# Supplementary material
Source: publisher figshare collection journal article supplement (https://acs.figshare.com/ndownloader/files/18112817)

## **Supporting Information**

“Catalytic asymmetric radical-polar crossover hydroalkoxylation”

Christopher A. Discolo\*, Eric E. Touney\*, and Sergey V. Pronin

Department of Chemistry, University of California

Irvine, California 92697-2025, United States

### **Contents:**

|                                              |                    |
|----------------------------------------------|--------------------|
| <b>Materials and methods</b>                 | <b>Page SI-2</b>   |
| <b>Preparation of Co(II) salen complexes</b> | <b>Page SI-3</b>   |
| <b>Preparation of starting materials</b>     | <b>Page SI-21</b>  |
| <b>Radical-polar crossover protocols</b>     | <b>Page SI-31</b>  |
| <b>Eyring analysis</b>                       | <b>Page SI-44</b>  |
| <b>Additional correlations observed</b>      | <b>Page SI-48</b>  |
| <b>Derivatization of enriched epoxide 11</b> | <b>Page SI-49</b>  |
| <b>References</b>                            | <b>Page SI-53</b>  |
| <b>Spectra</b>                               | <b>Page SI-54</b>  |
| <b>Chiral GC and SFC traces</b>              | <b>Page SI-124</b> |

**Materials and methods.** All reactions were carried out in flame-dried glassware under positive pressure of dry nitrogen unless otherwise noted. Reaction solvents including tetrahydrofuran (THF, Fisher, HPLC Grade), dichloromethane (DCM, Fisher, HPLC Grade), dimethylformamide (DMF, Fisher, HPLC Grade), and toluene (Fisher, HPLC Grade), were dried by percolation through a column packed with neutral alumina and a column packed with a supported copper catalyst for scavenging oxygen (Q5) under positive pressure of argon. Acetone was dried over anhydrous powdered  $\text{CaSO}_4$  overnight, distilled into a two-neck round bottom, and then transferred by cannula into a storage Schlenk. Solvents for extraction, thin layer chromatography (TLC), and flash column chromatography were purchased from Fischer (ACS Grade) and VWR (ACS Grade) and used without further purification. Chloroform- $d$  and acetone- $d_6$  for  $^1\text{H}$  and  $^{13}\text{C}$  NMR analysis were purchased from Cambridge Isotope Laboratories and used without further purification. Commercially available reagents were used without further purification unless otherwise noted. Reactions were cooled in a Thermo Scientific EK90 immersion cooler. Reactions were monitored by thin layer chromatography (TLC) using precoated silica gel plates (EMD Chemicals, Silica gel 60 F<sub>254</sub>). Flash column chromatography was performed over silica gel (Acros Organics, 60 Å, particle size 0.04-0.063 mm). Infrared (IR) spectra were obtained on a Nicolet iS5 FT-IR spectrometer with an iD5 ATR, and are reported in terms of frequency of absorption ( $\text{cm}^{-1}$ ). GC/FID analysis was performed on Agilent 7820A system with helium as carrier gas. Enantiomeric ratio for enantioselective reactions was determined by chiral SFC analysis using an Agilent Technologies HPLC (1200 series) system and Aurora A5 Fusion. Optical rotations were collected on a JASCO P-1010 polarimeter.  $^1\text{H}$  NMR and  $^{13}\text{C}$  NMR spectra were recorded on Bruker DRX-500 (BBO probe), Bruker DRX-500 (TCI cryoprobe), Bruker AVANCE600 (TBI probe), and Bruker AVANCE600 (BBFO cryoprobe) spectrometers using residual solvent peaks as internal standards ( $\text{CHCl}_3$  @ 7.26 ppm  $^1\text{H}$  NMR, 77.00 ppm  $^{13}\text{C}$  NMR;  $\text{C}_6\text{H}_6$  @ 7.16 ppm  $^1\text{H}$  NMR, 128.00 ppm  $^{13}\text{C}$  NMR;  $(\text{CD}_3)_2\text{CO}$  @ 2.05 ppm  $^1\text{H}$  NMR, 29.84 ppm  $^{13}\text{C}$  NMR;  $(\text{CD}_3)_2\text{SO}$  @ 2.50 ppm  $^1\text{H}$  NMR, 39.52 ppm  $^{13}\text{C}$  NMR). High-resolution mass spectra (HRMS) were recorded on Waters LCT Premier TOF spectrometer with ESI and CI sources.

**Scheme S2.** general approach to the synthesis of cobalt (II) catalysts **8-11**

**A.** preparation of naphthalene salicylaldehyde

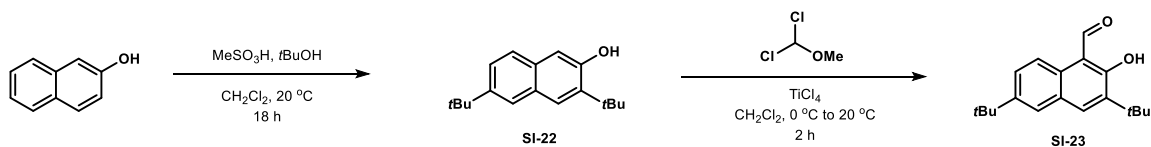

**B.** preparation of salen and cobalt complexation

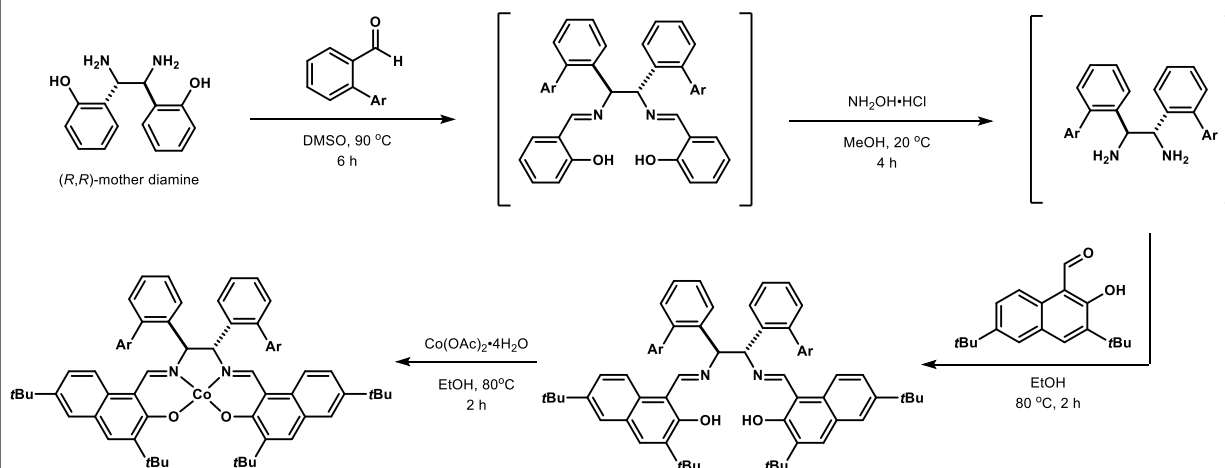

**Preparation of 3,6-di- $t$ -butyl-2-naphthol, SI-22.**

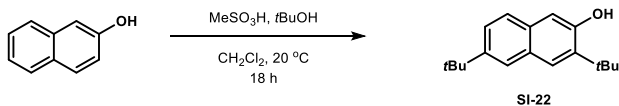

To a solution of 2-naphthol (7.2 g, 50 mmol, 1.0 equiv) and  $t\text{BuOH}$  (14 mL, 150 mmol, 3.0 equiv) in  $\text{CH}_2\text{Cl}_2$  (170 mL, 0.30 M w.r.t. 2-naphthol) in a 1 L roundbottom flask was added  $\text{MeSO}_3\text{H}$  (22 mL, 350 mmol, 7.0 equiv) dropwise with external cooling by a water bath and stirred for 18 h at room temperature following addition. The reaction mixture was poured onto ice water (500 mL) with vigorous stirring and then warmed to room temperature. The aqueous layer was extracted with  $\text{CH}_2\text{Cl}_2$  (3 x 100 mL), washed with  $\text{H}_2\text{O}$  and brine, dried over  $\text{MgSO}_4$ , filtered and concentrated under reduced pressure. The crude product was purified by flash  $\text{SiO}_2$  chromatography (gradient elution 10%  $\text{CH}_2\text{Cl}_2$ /hexanes to 40%  $\text{CH}_2\text{Cl}_2$ /hexanes) to yield 3,6-di- $t$ -butyl-2-naphthol as a white crystalline solid (5.2 g, 40% yield). The spectral data were identical to those reported in the literature.<sup>1</sup>

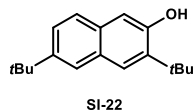

$^1\text{H}$  NMR (500 MHz,  $\text{CDCl}_3$ ,  $25^\circ\text{C}$ ):

$\delta$  7.68 (s, 2H)

7.56 (d,  $J = 8.9$  Hz, 1H)

7.47 (dd,  $J = 8.6, 2.0$  Hz, 1H)

6.98 (s, 1H), 4.97 (s, 1H)

1.50 (s, 9H), 1.39 (s, 9H)

### Preparation of naphthalene salicylaldehyde **SI-23**.

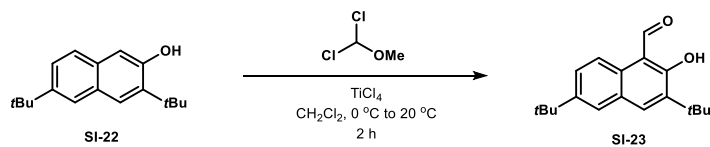

To a flame-dried, N<sub>2</sub>-purged 250 mL roundbottom flask was added **SI-22** (4.4 g, 17.1 mmol, 1.0 equiv) and dichloromethylmethyl ether (1.5 mL, 17.1 mmol, 1.0 equiv) in CH<sub>2</sub>Cl<sub>2</sub> (86 mL, 0.2 M w.r.t **SI-22**) and the flask was cooled to 0 °C in an ice bath. TiCl<sub>4</sub> (3.8 mL, 34.2 mmol, 2.0 equiv) was added dropwise to the reaction mixture at 0 °C. The ice bath was warmed to room temperature and stirred for 2 h. The reaction mixture was poured onto ice water (200 mL), and the aqueous layer was extracted with CH<sub>2</sub>Cl<sub>2</sub> (3 x 100 mL). The combined organic layers were washed with brine, dried over MgSO<sub>4</sub>, filtered, and concentrated under reduced pressure. The crude material was purified by flash silica chromatography (20% CH<sub>2</sub>Cl<sub>2</sub>/Hexanes) to yield 3.16 g (65% yield) of salicylaldehyde **SI-23**. The spectral data was identical to those reported in the literature.<sup>2</sup>

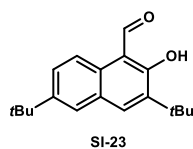

<sup>1</sup>H NMR (500 MHz, CDCl<sub>3</sub>, 25 °C):

δ 14.02 (s, 1H)

10.80 (s, 1H)

8.23 (d, J = 8.8 Hz, 1H)

7.92 (s, 1H)

7.71 (d, J = 2.1 Hz, 1H)

7.65 (dd, J = 8.8, 2.1 Hz, 1H)

1.51 (s, 9H)

1.41 (s, 9H)



**General Procedure I: Preparation of 2-arylbenzaldehydes SI-24-26.**

To a flame dried 50 mL round bottom flask was added 2-bromobenzaldehyde (1.0 equiv), aryl boronic acid (1.2 equiv), Pd(PPh<sub>3</sub>)<sub>2</sub>Cl<sub>2</sub> (0.050 equiv), triphenylphosphine (0.10 equiv), and Na<sub>2</sub>CO<sub>3</sub> (1.2 equiv). The flask was fitted with a septum and the atmosphere replaced with N<sub>2</sub>. Degassed EtOH (0.2 M w.r.t. benzaldehyde) and degassed H<sub>2</sub>O (2.0 M w.r.t. benzaldehyde) were added and the suspension stirred. The flask was equipped with a reflux condenser and the reaction was heated at 95 °C overnight. After allowing the reaction to cool to rt, the reaction was diluted with H<sub>2</sub>O and the resulting mixture was extracted with Et<sub>2</sub>O (3x). The organic layers were washed with brine and dried over MgSO<sub>4</sub>. The crude material was purified by flash silica chromatography to yield 2-arylbenzaldehyde.

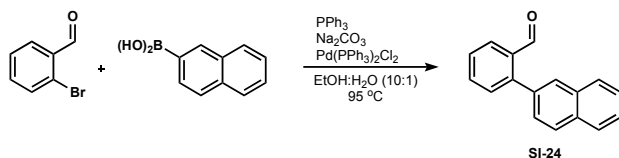

**Benzaldehyde SI-24.** Benzaldehyde SI-24 was prepared according to **General Procedure I** using 2-bromobenzaldehyde (0.23 mL, 2.0 mmol), 2-naphthylboronic acid (412.8 mg, 2.4 mmol), Pd(PPh<sub>3</sub>)<sub>2</sub>Cl<sub>2</sub> (70.2 mg, 0.1 mmol), triphenylphosphine (52.5 mg, 0.2 mmol), and Na<sub>2</sub>CO<sub>3</sub> (254.4 mg, 2.4 mmol), and purified by flash silica chromatography (gradient elution: 100% hexanes to 5% v/v EtOAc/hexanes) to yield 455.0 mg (98% yield) of **SI-24** as a white solid. The spectral data matched those reported in the literature.<sup>3</sup>

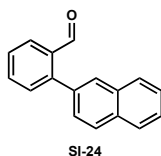**Benzaldehyde SI-24**

<sup>1</sup>H NMR (500 MHz, CDCl<sub>3</sub>, 25 °C):

δ 10.04 (d, *J* = 0.8 Hz, 1H)

8.08 (ddd, *J* = 7.8, 1.4, 0.5 Hz, 1H)

7.95 (d, *J* = 8.4 Hz, 1H)

7.93-7.88 (m, 2H)

7.83 (d, *J* = 1.2 Hz, 1H)

7.68 (ddd, *J* = 7.7, 7.3, 1.4 Hz, 1H)

7.57-7.52 (m, 5H)

TLC: R<sub>f</sub> = 0.46 (10% EtOAc/Hex)

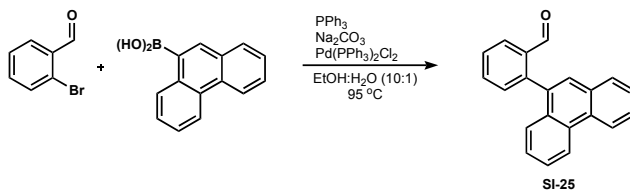

**Benzaldehyde SI-25.** Benzaldehyde SI-X was prepared according to **General Procedure I** using 2-bromobenzaldehyde (0.12 mL, 1.0 mmol), 9-phenanthrenylboronic acid (266.5 mg, 1.2 mmol), Pd(PPh<sub>3</sub>)<sub>2</sub>Cl<sub>2</sub> (35.1 mg, 0.05 mmol), triphenylphosphine (26.2 mg, 0.1 mmol), and Na<sub>2</sub>CO<sub>3</sub> (127.2 mg, 1.2 mmol), and purified by flash silica chromatography (gradient elution: 100% hexanes to 5% v/v EtOAc/hexanes) to yield 248.5 mg (88% yield) of **SI-25** as a white solid. The spectral data matched those reported in the literature.<sup>4</sup>

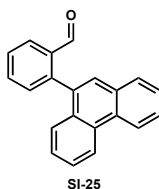

**Benzaldehyde SI-25**

<sup>1</sup>H NMR (500 MHz, CDCl<sub>3</sub>, 25 °C):

|                                       |                   |
|---------------------------------------|-------------------|
| δ 9.74 (d, <i>J</i> = 0.8 Hz, 1H)     | 7.71 (s, 1H)      |
| 8.80 (d, <i>J</i> = 8.6 Hz, 1H)       | 7.70-7.68 (m, 1H) |
| 8.76 (dd, <i>J</i> = 8.3, 0.5 Hz, 1H) | 7.68-7.65 (m, 1H) |
| 8.17-8.15 (m, 1H)                     | 7.64-7.61 (m, 1H) |
| 7.91-7.90 (m, 1H)                     | 7.55-7.53 (m, 2H) |
| 7.75-7.72 (m, 2H)                     | 7.53-7.51 (m, 1H) |

TLC: R<sub>f</sub> = 0.41 (10% EtOAc/Hex)

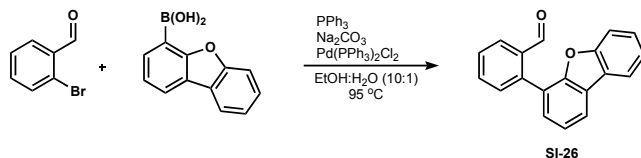

**Benzaldehyde SI-26.** Benzaldehyde SI-X was prepared according to **General Procedure I** using 2-bromobenzaldehyde (0.58 mL, 5.0 mmol), 4-(dibenzofuranyl)boronic acid (1.2721 g, 6.0 mmol), Pd(PPh<sub>3</sub>)<sub>2</sub>Cl<sub>2</sub> (175.4 mg, 0.25 mmol), triphenylphosphine (131.1 mg, 0.5 mmol), and Na<sub>2</sub>CO<sub>3</sub> (635.9 mg, 6.0 mmol), and purified by flash silica chromatography (gradient elution: 100% hexanes to 5% v/v EtOAc/hexanes) to yield 1.235 g (91% yield) of **SI-26** as a white solid.

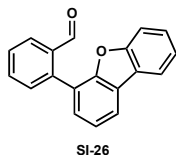

**Benzaldehyde SI-26**

<sup>1</sup>H NMR (500 MHz, CDCl<sub>3</sub>, 25 °C):

|                                       |                                       |                                             |
|---------------------------------------|---------------------------------------|---------------------------------------------|
| δ 9.91 (d, <i>J</i> = 0.7 Hz, 1H)     | 8.01 (dd, <i>J</i> = 7.7, 0.6 Hz, 1H) | 7.52-7.47 (m, 2H)                           |
| 8.15 (dd, <i>J</i> = 7.8, 0.8 Hz, 1H) | 7.75 (td, <i>J</i> = 7.5, 1.2 Hz, 1H) | 7.45 (ddt, <i>J</i> = 6.7, 4.9, 1.7 Hz, 2H) |
| 8.04 (dd, <i>J</i> = 7.4, 1.5 Hz, 1H) | 7.64-7.59 (m, 2H)                     | 7.39-7.36 (m, 1H)                           |

<sup>13</sup>C NMR (126 MHz, CDCl<sub>3</sub>, 25 °C):

|         |        |        |        |
|---------|--------|--------|--------|
| δ 191.9 | 133.91 | 127.64 | 122.3  |
| 156.3   | 131.5  | 124.6  | 120.96 |
| 153.8   | 128.9  | 124.0  | 120.89 |
| 140.0   | 128.6  | 123.17 | 112.0  |
| 134.06  | 127.69 | 123.14 |        |

HRMS (ESI) calculated for C<sub>19</sub>H<sub>12</sub>O<sub>2</sub> [M+Na]<sup>+</sup>: 295.0735, found: 295.0731

TLC: R<sub>f</sub> = 0.43 (10% EtOAc/Hex)

## General Procedure II: Preparation of Salen Ligands **SI-27-30**

### A. Diaza-Cope

The procedure for the diaza-Cope was adapted from the Chin group's report on diaza-Cope transformations with sterically challenging benzaldehydes.<sup>5</sup> (*R,R*)-Mother diamine (0.10 mmol, 24 mg, 1.0 equiv) and 2-arylbenzaldehyde (0.24 equiv, 2.4 equiv) in DMSO (0.50 mL, 0.20 M w.r.t. mother diamine) was added to a vial and stirred at 90 °C for 6 hours. The reaction mixture was diluted with CH<sub>2</sub>Cl<sub>2</sub> and transferred to a separatory funnel. The organic layer was washed with H<sub>2</sub>O (3 x 10 mL) and brine, dried with Na<sub>2</sub>SO<sub>4</sub>, filtered, and concentrated under reduced pressure. The crude diaza-Cope product was taken on to the next step without purification.

### B. Salicylaldehyde deprotection

Crude diaza-Cope product (1.0 equiv) and NH<sub>2</sub>OH•HCl (35 mg, 0.50 mmol, 5.0 equiv) in MeOH (1.0 mL, 0.10 M w.r.t. diaza-Cope product) was added to a vial and stirred at room temperature for 4 hours. 1 M NaOH (10 mL) was added to the reaction mixture and the aqueous layer was extracted with CH<sub>2</sub>Cl<sub>2</sub> (5 x 10 mL), dried with Na<sub>2</sub>SO<sub>4</sub>, filtered, and concentrated under reduced pressure. The crude diamine was taken on to the next step without purification.

### C. Salen Formation

Crude diamine (1.0 equiv) and naphthalene salicylaldehyde **SI-23** (0.20 mmol, 2.0 equiv) in EtOH (0.50 mL, 0.20 M w.r.t. diamine) was added to a vial and stirred at 60 °C for 4 hours. The reaction mixture was allowed to cool to room temperature, concentrated under reduced pressure, and purified by flash SiO<sub>2</sub> chromatography to afford salen as a yellow solid.

**Ligand SI-27.** Ligand **SI-27** was prepared according to General Procedure II with 2-phenylbenzaldehyde (44 mg, 0.24 mmol) and purified by flash silica chromatography (20% CH<sub>2</sub>Cl<sub>2</sub>/Hex) to afford ligand **SI-27** as a yellow solid (49 mg, 56% yield over three steps.)

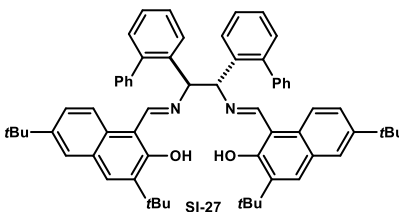

#### Salen SI-27

<sup>1</sup>H NMR (600 MHz, CDCl<sub>3</sub>, 25 °C):

|                                        |                                       |
|----------------------------------------|---------------------------------------|
| δ 14.90 (s, 1H)                        | 7.25 (dtd, J = 14.8, 7.2, 3.5 Hz, 4H) |
| 8.76 (s, 1H)                           | 7.06 (dd, J = 6.6, 1.6 Hz, 2H)        |
| 7.55 (d, J = 8.8 Hz, 1H)               | 7.04 (d, J = 31.2 Hz, 3H)             |
| 7.47 (td, J = 13.9, 7.5 Hz, 4H)        | 5.11 (s, 1H)                          |
| 7.43 (s, 1H), 7.37 (d, J = 1.9 Hz, 1H) | 1.33 (s, 10H)                         |
| 7.30 (dd, J = 8.8, 2.1 Hz, 1H)         | 1.31 (s, 9H).                         |

<sup>13</sup>C NMR (151 MHz, CDCl<sub>3</sub>, 25 °C):

|         |        |       |
|---------|--------|-------|
| δ 169.0 | 131.9  | 125.4 |
| 160.8   | 130.1  | 124.1 |
| 145.2   | 128.22 | 117.7 |
| 142.4   | 128.13 | 107.8 |
| 140.7   | 127.6  | 72.1  |
| 140.3   | 127.4  | 31.3  |
| 135.3   | 126.3  | 29.4  |

LRMS (ESI) calc. for C<sub>64</sub>H<sub>68</sub>N<sub>2</sub>O<sub>2</sub>Na [M+Na]<sup>+</sup>: 919.5, found: 919.6

TLC R<sub>f</sub> = 0.56 (35% v/v CH<sub>2</sub>Cl<sub>2</sub> in hexanes)

[α]<sub>D</sub><sup>23</sup> = −6.6 ° (c = 1.8, CHCl<sub>3</sub>)

**Ligand SI-28.** Ligand **SI-28** was prepared according to General Procedure II with **SI-24** (56 mg, 0.24 mmol) and purified by flash silica chromatography (20% CH<sub>2</sub>Cl<sub>2</sub>/Hex) to afford ligand **SI-28** as a yellow solid (52 mg, 51% yield over three steps.)

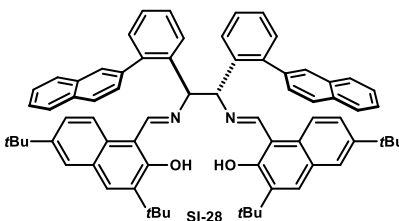

**Salen SI-28**

<sup>1</sup>H NMR (600 MHz, CDCl<sub>3</sub>, 25 °C):

|                                |                                |
|--------------------------------|--------------------------------|
| δ 13.06 (s, 1H)                | 7.24 (d, J = 7.8 Hz, 1H)       |
| 8.16 (s, 1H)                   | 7.20 (td, J = 7.7, 1.2 Hz, 1H) |
| 7.98-7.96 (m, 1H)              | 7.12 (d, J = 7.6 Hz, 1H)       |
| 7.88 (d, J = 8.2 Hz, 1H)       | 7.10-7.02 (m, 3H)              |
| 7.80 (s, 1H)                   | 6.80 (d, J = 8.2 Hz, 1H)       |
| 7.59 (dd, J = 6.2, 3.1 Hz, 1H) | 6.76 (t, J = 7.4 Hz, 1H)       |
| 7.57-7.52 (m, 1H)              | 5.05 (s, 1H).                  |

<sup>13</sup>C NMR (151 MHz, CDCl<sub>3</sub>, 25 °C):

|         |        |       |
|---------|--------|-------|
| δ 165.6 | 131.7  | 126.2 |
| 160.7   | 130.0  | 118.7 |
| 141.9   | 128.7  | 118.5 |
| 138.1   | 127.96 | 116.7 |
| 136.1   | 127.87 | 74.2  |
| 132.44  | 127.0  |       |
| 132.40  | 126.5  |       |

LRMS (ESI) calc. for C<sub>72</sub>H<sub>72</sub>N<sub>2</sub>O<sub>2</sub>Na [M+Na]<sup>+</sup>: 1019.6, found: 1019.6.

TLC R<sub>f</sub> = 0.61 (35% v/v CH<sub>2</sub>Cl<sub>2</sub> in hexanes)

[α]<sub>D</sub><sup>25</sup> = -130.6 ° (c = 1.3, CHCl<sub>3</sub>)

**Ligand SI-29.** Ligand **SI-29** was prepared according to General Procedure II with **SI-25** (68 mg, 0.24 mmol) and purified by flash silica chromatography (20% CH<sub>2</sub>Cl<sub>2</sub>/Hex) to afford ligand **SI-29** as a yellow solid (51 mg, 47% yield over three steps). NOTE: It was observed that **SI-29** is produced as a mixture of four atropisomers. This procedure was used to isolate a single (major) atropisomer of **SI-29** for characterization purposes. Control experiments determined that mixture of atropisomers is equally efficient in the hydrofunctionalization process (i.e. same yield and enantioenrichment).

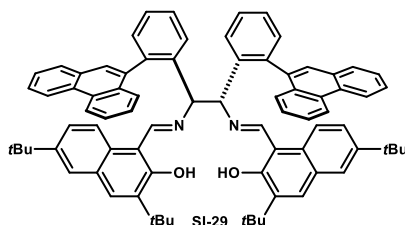

#### Salen SI-29

<sup>1</sup>H NMR (600 MHz, CDCl<sub>3</sub>, 25 °C):

|                                      |                   |
|--------------------------------------|-------------------|
| δ 14.72 (s, 1H)                      | 7.30 (s, 2H)      |
| 8.91 (t, J = 9.0 Hz, 2H)             | 7.24-7.21 (m, 2H) |
| 8.02 (d, J = 3.2 Hz, 1H)             | 7.18-7.13 (m, 2H) |
| 7.85-7.82 (m, 2H), 7.79-7.76 (m, 1H) | 7.05-7.01 (m, 2H) |
| 7.62 (td, J = 7.6, 1.2 Hz, 1H)       | 4.55 (s, 1H)      |
| 7.44 (td, J = 7.4, 1.2 Hz, 1H)       | 1.33 (s, 9H)      |
| 7.34 (d, J = 2.0 Hz, 1H)             | 0.96 (s, 9H)      |

<sup>13</sup>C NMR (151 MHz, CDCl<sub>3</sub>, 25 °C):

|        |       |       |
|--------|-------|-------|
| 167.2  | 130.1 | 123.7 |
| 161.1  | 129.8 | 123.2 |
| 145.1  | 129.3 | 122.8 |
| 139.7  | 129.1 | 118.5 |
| 139.6  | 128.7 | 107.6 |
| 137.3  | 128.5 | 74.6  |
| 136.33 | 127.8 | 34.6  |
| 131.3  | 127.0 | 34.2  |
| 131.2, | 126.8 | 31.3  |
| 131.1  | 126.7 | 28.9  |
| 130.4  | 126.2 |       |
| 130.2  | 124.9 |       |

LRMS (ESI) calc. for C<sub>80</sub>H<sub>76</sub>N<sub>2</sub>O<sub>2</sub>Na [M+Na]<sup>+</sup>: 1119.6, found: 1119.7.

TLC R<sub>f</sub> = 0.65 (35% v/v CH<sub>2</sub>Cl<sub>2</sub> in hexanes)

[α]<sub>D</sub><sup>25</sup> = -62.5 ° (c = 0.80, CHCl<sub>3</sub>)

**Ligand SI-30.** Ligand **SI-30** was prepared according to General Procedure II with **SI-26** (65 mg, 0.24 mmol) and purified by flash silica chromatography (20% CH<sub>2</sub>Cl<sub>2</sub>/Hex) to afford ligand **SI-30** as a yellow solid (45 mg, 42% yield over three steps.)

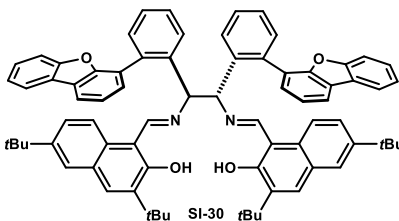

**Salen SI-30**

<sup>1</sup>H NMR (600 MHz, DMSO-d<sub>6</sub>, 100 °C):

|                                 |                           |
|---------------------------------|---------------------------|
| δ 14.68 (s, 1H)                 | 7.08 (d, J = 51.2 Hz, 3H) |
| 8.56 (s, 1H)                    | 6.87 (d, J = 5.3 Hz, 2H)  |
| 8.15 (dd, J = 25.7, 7.7 Hz, 2H) | 5.15 (s, 1H)              |
| 7.44-7.37 (m, 3H)               | 1.31 (s, 9H)              |
| 7.32 (t, J = 7.3 Hz, 2H)        | 1.21 (s, 9H)              |
| 7.21 (d, J = 6.6 Hz, 2H)        |                           |

<sup>13</sup>C NMR (600 MHz, DMSO-d<sub>6</sub>, 100 °C):

|         |        |       |
|---------|--------|-------|
| δ 169.1 | 127.7  | 119.7 |
| 159.8   | 127.41 | 117.2 |
| 154.8   | 127.40 | 110.8 |
| 152.3   | 126.9  | 106.5 |
| 144.0   | 126.4  | 70.66 |
| 139.8   | 125.1  | 70.64 |
| 136.1   | 123.87 | 53.9  |
| 135.5   | 123.75 | 33.9  |
| 130.8   | 123.31 | 33.2  |
| 129.9   | 123.20 | 30.4  |
| 129.4   | 122.4  | 28.7  |
| 128.17  | 122.1  |       |
| 128.17  | 120.2  |       |

LRMS (ESI) calc. for C<sub>76</sub>H<sub>72</sub>N<sub>2</sub>O<sub>4</sub>Na [M+Na]<sup>+</sup>: 1099.5, found: 1099.6.

TLC R<sub>f</sub> = 0.52 (35% v/v CH<sub>2</sub>Cl<sub>2</sub> in hexanes)

[α]<sub>D</sub><sup>25</sup> = 163 ° (c = 1.0, CHCl<sub>3</sub>)



### General Procedure III: Determination of Diamine Enantiopurity via Imidazolidinone

To a solution of crude diamine (0.05 mmol, 1.0 equiv) and triphosgene (22 mg, 0.075 mmol, 1.5 equiv) in  $\text{CH}_2\text{Cl}_2$  (350  $\mu\text{L}$ , 0.10 M w.r.t. diamine) was added triethylamine (21  $\mu\text{L}$ , 0.15 mmol, 3.0 equiv) at 0 °C. Following addition, the reaction was allowed to warm to room temperature and stirred until completion by TLC analysis. The reaction mixture was diluted with  $\text{CH}_2\text{Cl}_2$  (5 mL), washed with  $\text{H}_2\text{O}$  (10 mL), then brine (10 mL). The organic layer was dried over  $\text{Na}_2\text{SO}_4$ , filtered, and concentrated under reduced pressure. The crude material was purified by flash silica chromatography to afford imidazolidinone as a white solid. The enantioenrichment of the purified imidazolidinones was determined using chiral phase SFC. NOTE: Racemic standards were prepared by performing diaza-Cope, salicylaldehyde deprotection, and imidazolidinone formation with racemic mother diamine.

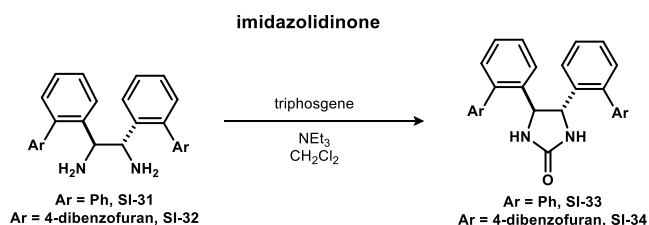

**Imidazolidinone SI-33:** Imidazolidinone **SI-33** was prepared according to General Procedure III using diamine **SI-31** (18 mg, 0.050 mmol) and purified by flash silica chromatography (60% v/v CH<sub>2</sub>Cl<sub>2</sub> in hexanes) to afford **SI-32** as a white solid (10 mg, 51% yield).

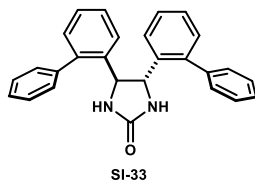

**Imidazolidinone SI-33**

<sup>1</sup>H NMR (600 MHz, CDCl<sub>3</sub>, 25 °C):

|                                  |               |
|----------------------------------|---------------|
| δ 7.47 (dd, J = 7.6, 1.3 Hz, 1H) | 7.09 (s, 1H)  |
| 7.33-7.27 (m, 1H)                | 6.58 (s, 2H)  |
| 7.21 (t, J = 7.5 Hz, 1H)         | 4.88 (s, 1H)  |
| 7.13 (dd, J = 7.5, 1.4 Hz, 1H)   | 4.64 (s, 1H). |

<sup>13</sup>C NMR (151 MHz, CDCl<sub>3</sub>, 25 °C):

|         |        |        |
|---------|--------|--------|
| δ 161.9 | 129.8  | 127.71 |
| 142.2   | 128.9  | 127.5  |
| 139.7   | 128.3  | 126.8  |
| 136.0   | 127.91 | 61.8   |

LRMS (ESI) calc. for C<sub>27</sub>H<sub>22</sub>N<sub>2</sub>ONa [M+Na]<sup>+</sup>: 413.2, found: 413.2.

TLC R<sub>f</sub> = 0.20 (50% v/v EtOAc in hexanes)

Chiral SFC: CHIRALPAK AD, 30% *i*PrOH, 2.0 mL/min, 210 nm, 44 °C, nozzle pressure = 200 bar CO<sub>2</sub>, t<sub>R</sub> = 4.8, 5.9 min.

[α]<sub>D</sub><sup>25</sup> = −23.1 ° (c = 0.80, CHCl<sub>3</sub>); 97% ee.

**Imidazolidinone SI-34:** Imidazolidinone **SI-34** was prepared according to General Procedure III using diamine **SI-32** (27 mg, 0.050 mmol) and purified by flash silica chromatography (60% v/v CH<sub>2</sub>Cl<sub>2</sub> in hexanes) to afford **SI-34** as a white solid (17 mg, 55% yield).

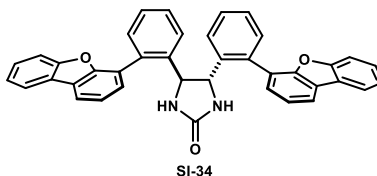

#### Imidazolidinone SI-34

<sup>1</sup>H NMR (600 MHz, DMSO-d<sub>6</sub>, 100 °C):

|                                |                          |
|--------------------------------|--------------------------|
| δ 8.09 (d, J = 7.6 Hz, 1H)     | 7.17 (t, J = 7.2 Hz, 1H) |
| 7.99 (dd, J = 7.7, 1.2 Hz, 1H) | 7.11-7.00 (m, 2H)        |
| 7.51 (d, J = 8.0 Hz, 1H)       | 6.84 (s, 1H)             |
| 7.46 (td, J = 7.7, 1.3 Hz, 1H) | 6.39 (s, 1H)             |
| 7.40-7.37 (m, 1H)              | 4.60 (s, 1H)             |
| 7.26 (d, J = 7.8 Hz, 1H)       |                          |

<sup>13</sup>C NMR (151 MHz, DMSO-d<sub>6</sub>, 100 °C):

|         |        |       |
|---------|--------|-------|
| δ 161.3 | 127.6  | 122.3 |
| 155.1   | 126.7  | 122.0 |
| 152.4   | 126.4  | 120.4 |
| 138.2   | 126.1  | 119.3 |
| 134.8   | 123.5  | 111.2 |
| 129.4   | 123.24 | 61.2  |
| 127.9   | 123.10 |       |

LRMS (ESI) calc. for C<sub>39</sub>H<sub>26</sub>N<sub>2</sub>O<sub>3</sub>Na [M+Na]<sup>+</sup>: 593.2, found: 593.2.

TLC R<sub>f</sub> = 0.36 (50% v/v EtOAc in hexanes)

Chiral SFC: CHIRALPAK AD, 30% iPrOH, 2.0 mL/min, 210 nm, 40 °C, nozzle pressure = 200 bar CO<sub>2</sub>, t<sub>R</sub> = 16.9, 24.3 min.

[α]<sub>D</sub><sup>25</sup> = 34.7 ° (c = 1.6, CHCl<sub>3</sub>); 96% ee.

#### General Procedure IV: Determination of Diamine Enantiopurity via Diaza-Cope

(*R,R*)-Mother diamine (0.10 mmol, 24 mg, 1.0 equiv) and 2-arylbenzaldehyde (0.24 equiv, 2.4 equiv) in DMSO (0.50 mL, 0.20 M w.r.t. mother diamine) was added to a vial and stirred at 90 °C for 6 hours. The reaction mixture was diluted with CH<sub>2</sub>Cl<sub>2</sub> and transferred to a separatory funnel. The organic layer was washed with H<sub>2</sub>O (3 x 10 mL) and brine, dried with Na<sub>2</sub>SO<sub>4</sub>, filtered, and concentrated under reduced pressure. The crude material was purified by flash silica chromatography (40% v/v CH<sub>2</sub>Cl<sub>2</sub> in hexanes) to afford diaza-Cope product as a white solid. The enantioenrichment of the purified diaza-Cope product was determined using chiral phase SFC. NOTE: Racemic standards were prepared by performing diaza-Cope with racemic mother diamine.

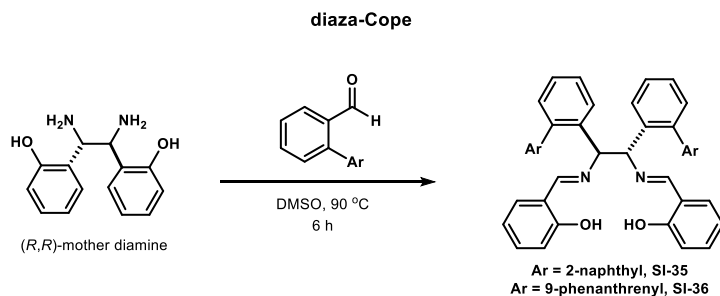

**Diaza-Cope Product SI-35.** Diaza-Cope product **SI-35** was prepared according to General Procedure IV using **SI-24** (60 mg, 0.24 mmol) and purified by flash silica chromatography (40% v/v CH<sub>2</sub>Cl<sub>2</sub> in hexanes) to afford diaza-Cope product **SI-35** as a white solid (45 mg, 67% yield.)

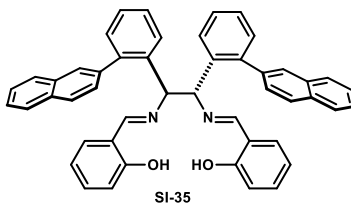

**Diaza-Cope product SI-35**

<sup>1</sup>H NMR (600 MHz, CDCl<sub>3</sub>, 25 °C):

|                                |                                |
|--------------------------------|--------------------------------|
| δ 13.06 (s, 1H)                | 7.20 (td, J = 7.7, 1.2 Hz, 1H) |
| 8.16 (s, 1H)                   | 7.12 (d, J = 7.6 Hz, 1H)       |
| 7.98-7.96 (m, 1H)              | 7.09 (d, J = 8.4 Hz, 1H)       |
| 7.88 (d, J = 8.2 Hz, 1H)       | 7.05-7.02 (m, 1H)              |
| 7.80 (s, 1H)                   | 6.80 (d, J = 8.2 Hz, 1H)       |
| 7.59 (dd, J = 6.2, 3.1 Hz, 1H) | 6.76 (t, J = 7.4 Hz, 1H)       |
| 7.57-7.52 (m, 1H)              | 5.05 (s, 1H)                   |
| 7.26-7.23 (m, 1H)              |                                |

<sup>13</sup>C NMR (151 MHz, CDCl<sub>3</sub>, 25 °C):

|         |        |       |
|---------|--------|-------|
| δ 165.6 | 131.7  | 126.2 |
| 160.7   | 130.0  | 118.7 |
| 141.9   | 128.7  | 118.5 |
| 138.1   | 127.96 | 116.7 |
| 136.1   | 127.87 | 74.2  |
| 132.44  | 127.0  |       |
| 132.40  | 126.5  |       |

LRMS (ESI) calc. for C<sub>48</sub>H<sub>36</sub>N<sub>2</sub>O<sub>2</sub>Na [M+Na]<sup>+</sup>: 695.3, found: 695.3.

TLC R<sub>f</sub> = 0.13 (40% v/v CH<sub>2</sub>Cl<sub>2</sub> in hexanes)

Chiral SFC: CHIRALPAK AD, 20% *i*PrOH, 2.0 mL/min, 254 nm, 40 °C, nozzle pressure = 200 bar CO<sub>2</sub>, t<sub>R</sub> = 8.1, 11.8 min.

[α]<sub>D</sub><sup>25</sup> = −71.7 ° (c = 2.0, CHCl<sub>3</sub>); 95% ee.

**Diaza-Cope Product SI-36.** Diaza-Cope product **SI-36** was prepared according to General Procedure IV using **SI-25** (67 mg, 0.24 mmol) and purified by flash silica chromatography (40% v/v CH<sub>2</sub>Cl<sub>2</sub> in hexanes) to afford diaza-Cope product **SI-36** as a white solid (34 mg, 44% yield).

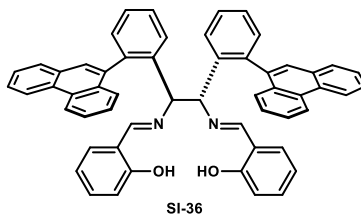

**Diaza-Cope product SI-36**

<sup>1</sup>H NMR (600 MHz, CDCl<sub>3</sub>, 25 °C):

|                                      |                                      |
|--------------------------------------|--------------------------------------|
| δ 12.89 (s, 1H)                      | 7.17 (ddd, J = 8.2, 6.9, 1.1 Hz, 1H) |
| 8.85 (dd, J = 8.1, 5.9 Hz, 2H)       | 7.11 (tdd, J = 7.6, 3.7, 1.4 Hz, 2H) |
| 7.83 (d, J = 7.6 Hz, 1H)             | 7.07 (dd, J = 7.9, 1.1 Hz, 1H)       |
| 7.80 (td, J = 7.7, 1.4 Hz, 1H)       | 7.03 (d, J = 7.5 Hz, 1H)             |
| 7.77-7.75 (m, 1H)                    | 6.84 (s, 1H)                         |
| 7.64 (ddd, J = 8.3, 6.9, 1.3 Hz, 1H) | 6.73 (dd, J = 7.6, 1.6 Hz, 1H)       |
| 7.41 (td, J = 7.3, 1.3 Hz, 1H)       | 6.69-6.66 (m, 2H)                    |
| 7.27 (s, 1H)                         | 4.45 (s, 1H).                        |
| 7.24 (dd, J = 7.4, 1.1 Hz, 1H)       |                                      |

<sup>13</sup>C NMR (151 MHz, CDCl<sub>3</sub>, 25 °C):

|         |        |        |
|---------|--------|--------|
| δ 165.8 | 130.14 | 126.54 |
| 160.6   | 130.12 | 126.42 |
| 139.6   | 129.27 | 123.2  |
| 137.6   | 129.08 | 122.8  |
| 136.2   | 129.05 | 118.5  |
| 132.1   | 128.3  | 118.1  |
| 131.5   | 127.6  | 116.5  |
| 131.25  | 127.2  | 75.3   |
| 131.17  | 126.92 |        |
| 130.32  | 126.84 |        |

LRMS (ESI) calc. for C<sub>56</sub>H<sub>40</sub>N<sub>2</sub>O<sub>2</sub>Na [M+Na]<sup>+</sup>:795.3, found:795.3.

TLC R<sub>f</sub> = 0.15 (40% v/v CH<sub>2</sub>Cl<sub>2</sub> in hexanes)

Chiral SFC: CHIRALPAK AD, 20% *i*PrOH, 2.0 mL/min, 210 nm, 40 °C, nozzle pressure = 200 bar CO<sub>2</sub>, t<sub>R</sub> = 15.1, 31.5 min.

[α]<sub>D</sub><sup>25</sup> = −126 ° (c = 1.0, CHCl<sub>3</sub>); 99% ee.

#### General Procedure V: Preparation of Co(II) Salen Complexes 4-8

A vial was charged with  $\text{Co}(\text{OAc})_2 \cdot 4\text{H}_2\text{O}$  (25 mg, 0.10 mmol, 1.0 equiv) and salen (0.10 mmol, 1.0 equiv) and purged with  $\text{N}_2$ . EtOH (500  $\mu\text{L}$ , 0.20 M w.r.t. salen) was degassed by sparging with Ar under sonication for 5 minutes and then added to the reaction vial. The reaction mixture was heated to 80  $^\circ\text{C}$  with vigorous stirring for 2 hours at which point the Co(II) salen had precipitated out of solution as a bright red solid. The solid transferred to a fine glass frit and washed with MeOH (3 x 10 mL).  $\text{CH}_2\text{Cl}_2$  (15 mL) was then added to the fine glass frit to dissolve the bright red solid, filtered through into a clean flask, and then concentrated under reduced pressure to afford the Co(II) salen as a bright red powder.

**Co(II) salen complex 5.** Co(II) salen complex **5** was prepared according to General Procedure V with salen **SI-27** (90 mg, 0.10 mmol) to afford Co(II) salen complex **5** as a bright red powder (92 mg, 96% yield).

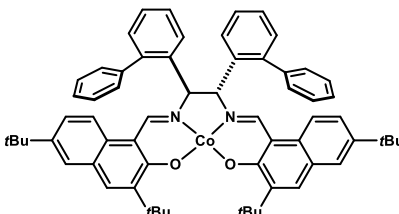

#### Co(II) salen complex 5

IR: 3057.98, 2955.83, 2860.67, 1594.55, 1569.99, 1538.49, 1497.48, 1478.37, 1409.33, 1388.18, 1380.67, 745.53, 700.62  $\text{cm}^{-1}$

LRMS (ES) calculated for  $\text{C}_{64}\text{H}_{67}\text{CoN}_2\text{O}_2$   $[\text{M}+\text{H}]^+$  calc: 954.5, found 954.5:

**Co(II) salen complex 6.** Co(II) salen complex **6** was prepared according to General Procedure V with salen **SI-28** (100 mg, 0.10 mmol) to afford Co(II) salen complex **6** as a bright red powder (103 mg, 98% yield).

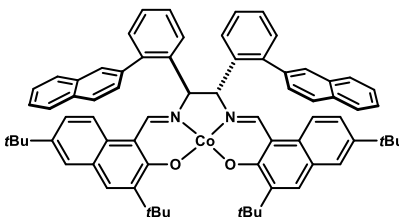

IR: 3052.02, 2956.77, 2866.92, 1595.10, 1538.75, 1496.33, 1432.16, 1381.06, 1338.43, 757.36, 742.69, 691.94  $\text{cm}^{-1}$

LRMS (ES) calculated for  $\text{C}_{72}\text{H}_{71}\text{CoN}_2\text{O}_2$   $[\text{M}+\text{H}]^+$  calc: 1054.5, found 1054.5:

**Co(II) salen complex 7.** Co(II) salen complex **7** was prepared according to General Procedure V with salen **SI-29** (110 mg, 0.10 mmol) to afford Co(II) salen complex **7** as a bright red powder (105 mg, 91% yield).

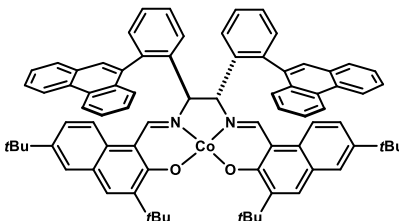

IR: 2955.36, 1594.44, 1537.54, 1380.48, 1338.29, 1261.84, 815.49, 746.88, 725.89  $\text{cm}^{-1}$

LRMS (ES) calculated for  $\text{C}_{80}\text{H}_{75}\text{CoN}_2\text{O}_2$   $[\text{M}+\text{H}]^+$  calc: 1154.6, found 1154.6.

**Co(II) salen complex 8.** Co(II) salen complex **8** was prepared according to General Procedure V with salen **SI-30** (108 mg, 0.10 mmol) to afford Co(II) salen complex **8** as a bright red powder (106 mg, 93% yield).

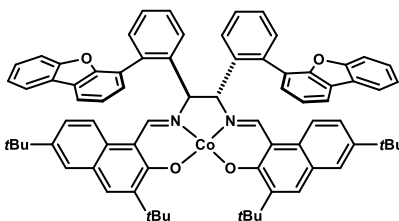

IR: 3705.87, 3680.15, 2966.13, 2922.03, 2864.92, 1537.86, 1380.04, 1186.19, 1055.94, 1014.08, 750.96  $\text{cm}^{-1}$

LRMS (ES) calculated for  $\text{C}_{76}\text{H}_{71}\text{CoN}_2\text{O}_2$   $[\text{M}+\text{H}]^+$  calc: 1134.5, found 1134.5:



## Preparation of starting materials

### General procedure VI: Synthesis of allylic alcohols

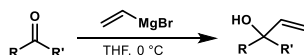

**Allylic alcohols.** A solution of vinylmagnesium bromide (2.0 equiv.) in THF (0.6 M w.r.t. Grignard reagent) was cooled to 0 °C. A solution of ketone (1.0 equiv.) in THF (0.6 M w.r.t. ketone, final reaction concentration 0.2 M) was added slowly. After 1 h, the reaction was quenched by the addition of saturated aqueous NH<sub>4</sub>Cl (30 mL). The resulting mixture was extracted with Et<sub>2</sub>O 3x 30 mL. The organics were washed with brine and dried over MgSO<sub>4</sub>. The desired allylic alcohols were purified by flash column chromatography.

**Allylic alcohol SI-37.** Allylic alcohol **SI-37** was prepared according to General Procedure VI with N-tosylnortropinone<sup>6</sup> (100 mg, 0.36 mmol) and vinylmagnesium bromide (720  $\mu$ L, 0.72 mmol, 1.0 M solution in THF) in THF (1.8 mL) to afford allylic alcohol **SI-37** as a white crystalline solid (61 mg, 55% yield).

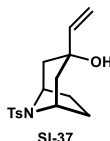

#### Allylic alcohol SI-37

<sup>1</sup>H NMR (600 MHz, CDCl<sub>3</sub>, 25 °C):

|                                   |                   |
|-----------------------------------|-------------------|
| $\delta$ 7.75 (d, J = 8.2 Hz, 2H) | 2.42 (s, 3H)      |
| 7.28 (s, 2H)                      | 2.15-2.06 (m, 4H) |
| 5.79 (dd, J = 17.2, 10.6 Hz, 1H)  | 1.66-1.63 (m, 2H) |
| 5.17 (d, J = 17.2 Hz, 1H)         | 1.47-1.45 (m, 2H) |
| 4.99 (d, J = 10.6 Hz, 1H)         | 1.14 (s, 1H).     |
| 4.25 (s, 2H)                      |                   |

<sup>13</sup>C NMR (151 MHz, CDCl<sub>3</sub>, 25 °C):

|                |       |      |
|----------------|-------|------|
| $\delta$ 158.5 | 129.6 | 56.1 |
| 147.0          | 127.3 | 44.7 |
| 143.3          | 111.2 | 27.8 |
| 137.3          | 71.6  | 21.5 |

LRMS (ESI) calc. for C<sub>16</sub>H<sub>21</sub>NO<sub>3</sub>SNa [M+Na]<sup>+</sup>: 330.1, found: 330.1.

TLC R<sub>f</sub> = 0.50 (50% v/v EtOAc in hexanes)

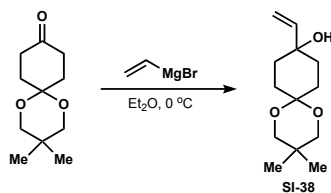

**Allylic alcohol SI-38.** A solution of vinylmagnesium bromide (5.0 mL, 1.0 M in THF, 5.0 mmol) in Et<sub>2</sub>O (10 mL) was cooled to 0 °C. A solution of 1,4-cyclohexanedione mono(2,2-dimethyltrimethylene ketal) (594.8 mg, 3.0 mmol) in Et<sub>2</sub>O (5.0 mL) was added slowly. After 1 h, the reaction was quenched by the addition of sat. aq. NH<sub>4</sub>Cl (10 mL). The resulting mixture was extracted with Et<sub>2</sub>O 3x 30 mL. The organics were washed with brine and dried over MgSO<sub>4</sub>. The crude material was purified by flash silica chromatography (gradient elution: 100% hexanes to 60% v/v Et<sub>2</sub>O/hexanes) to yield 620.5 mg (91% yield) of **SI-38** as a white solid.

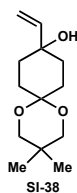

Allylic alcohol **SI-38**

<sup>1</sup>H NMR (500 MHz, CDCl<sub>3</sub>, 25 °C):

|                                           |                                        |
|-------------------------------------------|----------------------------------------|
| δ 5.96 (dd, <i>J</i> = 17.4, 10.8 Hz, 1H) | 2.04-2.01 (m, 2H)                      |
| 5.27 (dd, <i>J</i> = 17.3, 0.4 Hz, 1H)    | 1.87-1.81 (m, 2H)                      |
| 5.05 (dd, <i>J</i> = 10.8, 0.2 Hz, 1H)    | 1.72 (td, <i>J</i> = 13.0, 3.8 Hz, 2H) |
| 3.54 (s, 2H), 3.47 (s, 2H)                | 1.55 (d, <i>J</i> = 13.2 Hz, 2H)       |

<sup>13</sup>C NMR (126 MHz, CDCl<sub>3</sub>, 25 °C):

|       |       |      |
|-------|-------|------|
| 145.5 | 70.13 | 27.9 |
| 111.9 | 70.07 | 22.8 |
| 97.3  | 33.8  |      |
| 71.4  | 30.3  |      |

LRMS (ESI) calculated for C<sub>13</sub>H<sub>22</sub>O<sub>3</sub> [M+Na]<sup>+</sup>: 249.1468, found: 249.4133

TLC: R<sub>f</sub> = 0.17 (50% Et<sub>2</sub>O/Hex)

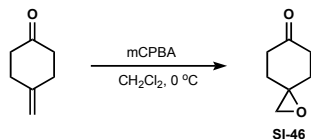

**Epoxyketone SI-46.** *m*CPBA (3.36 g, 19.46 mmol) was added in three equal portions over 15 min to a solution of 4-methylenecyclohexan-1-one<sup>7</sup> (1.07 g, 9.73 mmol) in CH<sub>2</sub>Cl<sub>2</sub> (32.4 mL, 0.3M) cooled to 0 °C. After 2.5 h the reaction was quenched with 15 mL sat aq. Na<sub>2</sub>S<sub>2</sub>O<sub>3</sub> and the mixture was extracted 3x with CH<sub>2</sub>Cl<sub>2</sub> (25 mL each). The organic layers were washed with sat aq. NaHCO<sub>3</sub>, brine, and then dried over MgSO<sub>4</sub>. The crude material was purified by flash silica chromatography (gradient elution: 100% pentane to 50% v/v Et<sub>2</sub>O/pentane) to yield 962.6 mg (78% yield) of epoxyketone **SI-46**.

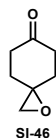

Epoxyketone **SI-46**

<sup>1</sup>H NMR (500 MHz, CDCl<sub>3</sub>, 25 °C):

δ 2.80 (s, 2H)

2.64 (ddd, *J* = 15.3, 10.7, 5.4 Hz, 2H)

2.41 (dt, *J* = 14.0, 5.0 Hz, 2H)

2.16-2.10 (m, 2H)

1.75 (dt, *J* = 12.6, 5.8 Hz, 2H)

<sup>13</sup>C NMR (126 MHz, CDCl<sub>3</sub>, 25 °C):

δ 209.9

56.9

54.1

38.9

32.3

HRMS (CI) calculated for C<sub>7</sub>H<sub>10</sub>O<sub>2</sub> [M]<sup>+</sup>: 126.0681, found: 126.0680

TLC: R<sub>f</sub> = 0.15 (50% Et<sub>2</sub>O/Hex)

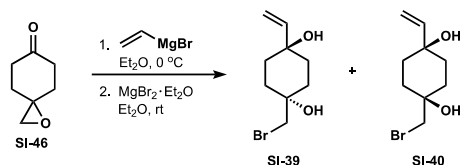

**Bromohydrins SI-39 and SI-40.** Vinylmagnesium bromide (1.0 M in THF, 8.0 mL, 8.0 mmol) was added slowly to a solution of **SI-46** (962.6 mg, 7.69 mmol) in Et<sub>2</sub>O (34 mL, 0.23 M) cooled to 0 °C. After 1.5 h the reaction was quenched with sat. aq. NH<sub>4</sub>Cl and the mixture was extracted with Et<sub>2</sub>O 3x (50 mL each). The organic layers were washed with brine and dried over Na<sub>2</sub>SO<sub>4</sub>. The crude material was purified by flash silica chromatography (gradient elution: 100% hexanes to 20% v/v Et<sub>2</sub>O/hexanes) to yield 420.1 mg (35% yield) of an inseparable mixture of diastereomeric allylic alcohols. The mixture of allylic alcohols (100.0 mg, 0.648 mmol) was dissolved in THF (6.5 mL, 0.1 M) at 0 °C and MgBr<sub>2</sub>·Et<sub>2</sub>O (837.2 mg, 3.24 mmol) was added in a single portion.<sup>8</sup> After 10 min the reaction was allowed to warm to rt and then stirred for a further 18 h. The reaction was quenched with H<sub>2</sub>O and the mixture extracted with Et<sub>2</sub>O 3x (25 mL each). The organics were washed with brine and dried over Na<sub>2</sub>SO<sub>4</sub>. The crude material was purified by flash silica chromatography (gradient elution: 100% hexanes to 60% v/v EtOAc/hexanes) to yield 61.1 mg (40% yield) of **SI-39** and 64.7 mg (42% yield) of **SI-40** as white solids. The diastereomeric bromohydrins were distinguished on the basis of NOESY analysis and an observation that diastereomer **SI-39** undergoes formation of corresponding [2.2.2]-oxabicyclic product (in addition to the expected epoxide) upon exposure to NaH in THF.

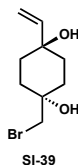

#### Bromohydrin **SI-39**

<sup>1</sup>H NMR (500 MHz, CDCl<sub>3</sub>, 25 °C):

|                                           |                                        |
|-------------------------------------------|----------------------------------------|
| δ 5.99 (dd, <i>J</i> = 17.4, 10.7 Hz, 1H) | 1.79 (td, <i>J</i> = 13.1, 3.3 Hz, 3H) |
| 5.26 (d, <i>J</i> = 17.4 Hz, 1H)          | 1.68 (d, <i>J</i> = 12.9 Hz, 2H)       |
| 5.05 (d, <i>J</i> = 10.8 Hz, 1H)          | 1.49 (d, <i>J</i> = 13.0 Hz, 2H)       |
| 3.49 (s, 2H)                              | 1.14 (s, 1H)                           |
| 1.93-1.87 (m, 2H)                         |                                        |

<sup>13</sup>C NMR (126 MHz, CDCl<sub>3</sub>, 25 °C):

|         |      |
|---------|------|
| δ 146.0 | 47.4 |
| 111.6   | 32.5 |
| 71.2    | 30.7 |
| 69.1    |      |

HRMS (CI) calculated for C<sub>9</sub>H<sub>15</sub>BrO<sub>2</sub> [M]<sup>+</sup>: 234.0255, found: 234.0248

TLC: R<sub>f</sub> = 0.21 (30% EtOAc/Hex)

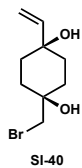

**Bromohydrin SI-40**

$^1\text{H}$  NMR (500 MHz,  $\text{CDCl}_3$ , 25 °C):

|                                             |                                   |
|---------------------------------------------|-----------------------------------|
| $\delta$ 5.97 (dd, $J$ = 17.4, 10.8 Hz, 1H) | 1.91 (dd, $J$ = 10.7, 5.9 Hz, 2H) |
| 5.31 (d, $J$ = 17.4 Hz, 1H)                 | 1.82 (t, $J$ = 11.7 Hz, 2H)       |
| 5.15 (d, $J$ = 10.7 Hz, 1H)                 | 1.62 (dd, $J$ = 11.6, 7.0 Hz, 4H) |
| 3.52 (s, 2H)                                | 1.51 (bs, 1H)                     |
| 2.04 (bs, 1H)                               |                                   |

$^{13}\text{C}$  NMR (126 MHz,  $\text{CDCl}_3$ , 25 °C):

|                |      |
|----------------|------|
| $\delta$ 143.2 | 44.7 |
| 113.7          | 34.0 |
| 71.2           | 32.3 |
| 69.5           |      |

HRMS (CI) calculated for  $\text{C}_9\text{H}_{15}\text{BrO}_2$   $[\text{M}]^+$ : 234.0255, found: 234.0258

TLC:  $R_f$  = 0.25 (60% EtOAc/Hex)

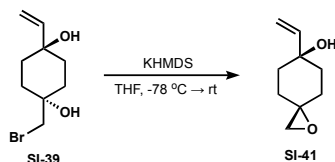

**Allylic alcohol SI-41.** KHMDS (0.5 M in PhMe, 1.7 mL, 0.85 mmol) was added slowly to a solution of bromohydrin **SI-39** (50.0 mg, 0.213 mmol) in THF (5.0 mL, 0.04 M) at  $-78\text{ }^{\circ}\text{C}$ . After 5 min, the reaction was removed from the cooling bath and warmed to rt. After 45 min the reaction was quenched by the addition of sat. aq.  $\text{NH}_4\text{Cl}$ . The resulting mixture was extracted with  $\text{Et}_2\text{O}$  3x 10 mL. The organics were washed with brine and dried over  $\text{Na}_2\text{SO}_4$ . The crude material was purified by flash silica chromatography (gradient elution: 100% hexanes to 30% v/v  $\text{Et}_2\text{O}$ /hexanes) to yield 27.3 mg (83% yield) of **SI-41** as a clear colorless oil.

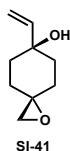

Allylic alcohol **SI-41**

$^1\text{H}$  NMR (500 MHz,  $\text{CDCl}_3$ ,  $25\text{ }^{\circ}\text{C}$ ):

|                                             |                                   |
|---------------------------------------------|-----------------------------------|
| $\delta$ 5.99 (dd, $J = 17.4, 10.8$ Hz, 1H) | 1.86 (td, $J = 13.3, 4.1$ Hz, 2H) |
| 5.27 (d, $J = 17.4$ Hz, 1H)                 | 1.64 (d, $J = 13.5$ Hz, 2H)       |
| 5.06 (d, $J = 10.8$ Hz, 1H)                 | 1.50 (s, 1H)                      |
| 2.66 (s, 2H)                                | 1.19 (d, $J = 13.6$ Hz, 2H)       |
| 2.24 (td, $J = 13.3, 4.1$ Hz, 2H)           |                                   |

$^{13}\text{C}$  NMR (126 MHz,  $\text{CDCl}_3$ ,  $25\text{ }^{\circ}\text{C}$ ):

|                |      |
|----------------|------|
| $\delta$ 145.8 | 54.1 |
| 111.8          | 34.8 |
| 71.0           | 28.4 |
| 58.0           |      |

LRMS (ESI) calculated for  $\text{C}_9\text{H}_{14}\text{O}_2$   $[\text{M}+\text{Na}]^+$ : 177.0892, found: 177.0894

TLC:  $R_f = 0.44$  (50%  $\text{EtOAc}$ /Hex)

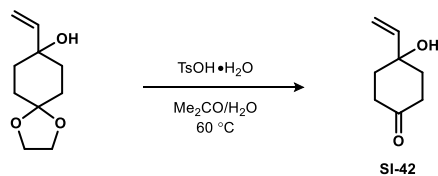

**Allylic Alcohol SI-42.** *p*-Toluenesulfonic acid monohydrate (361 mg, 1.92 mmol, 0.10 equiv) was added to a solution of 8-vinyl-1,4-dioxaspiro[4.5]decan-8-ol<sup>9</sup> (3.54 g, 19.2 mmol, 1.0 equiv) in Me<sub>2</sub>CO/H<sub>2</sub>O (1:1 v/v, 100 mL, 0.20 M w.r.t. allylic alcohol) and stirred for 5 minutes at 25 °C, then heated to 60 °C for 4 h. The reaction mixture was cooled to ambient temperature and the acetone was removed under reduced pressure. EtOAc (50 mL) and NaHCO<sub>3</sub> (sat. aq., 100 mL) was added to the reaction mixture and the aqueous layer was extracted with EtOAc (3 x 50 mL). The combined organic layers were dried over MgSO<sub>4</sub>, filtered, and concentrated under reduced pressure. The crude material was purified by flash column chromatography (40% v/v EtOAc/hexanes) to afford **SI-42** as a white crystalline solid (2.50 g, 93% yield). The spectral data for **SI-42** matched those reported in the literature.<sup>10</sup>

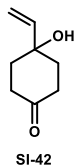

**Allylic Alcohol SI-42.**

<sup>1</sup>H NMR (600 MHz, CDCl<sub>3</sub>, 25 °C):

|                                    |                                       |
|------------------------------------|---------------------------------------|
| δ 6.02 (dd, J = 17.4, 10.7 Hz, 1H) | 2.29 (ddt, J = 14.8, 5.4, 2.4 Hz, 2H) |
| 5.35 (dd, J = 17.4, 0.8 Hz, 1H)    | 1.96 (dq, J = 9.3, 3.3 Hz, 4H)        |
| 5.16 (dd, J = 10.8, 0.8 Hz, 1H)    | 1.68-1.54 (m, 2H).                    |
| 2.79-2.74 (m, 2H)                  |                                       |

<sup>13</sup>C NMR (151 MHz, CDCl<sub>3</sub>, 25 °C):

|         |       |
|---------|-------|
| δ 211.4 | 70.6  |
| 144.1   | 37.07 |
| 113.0   | 36.95 |

LRMS (ESI) calculated for C<sub>8</sub>H<sub>12</sub>O<sub>2</sub> [M+Na]<sup>+</sup>: 163.1, found: 163.1

TLC: R<sub>f</sub> = 0.27 (40% EtOAc/Hex)

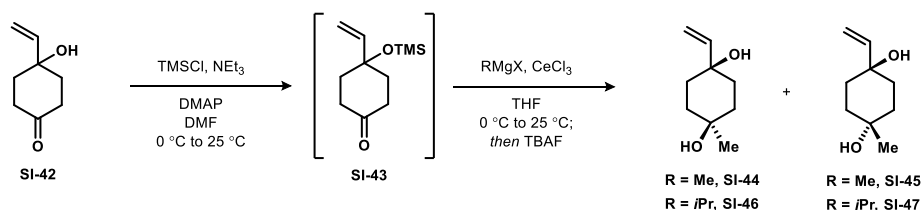

### General Procedure for Preparation of *trans*-cyclohexanediols.

**TMS Protection of SI-42.** Trimethylsilyl chloride (2.5 mL, 19.7 mmol, 1.1 equiv) was added dropwise to a solution of **SI-42** (2.50 g, 17.9 mmol, 1.0 equiv), triethylamine (3.7 mL, 26.9 mmol, 1.5 equiv), and DMAP (122 mg, 1.79 mmol, 0.10 equiv) in DMF (45 mL, 0.40 M w.r.t. **SI-42**) at 0 °C. The reaction was stirred at 0 °C for 30 min and then allowed to warm to ambient temperature and stirred for an additional 2 h. The reaction was cooled to 0 °C and quenched by the addition of a saturated aqueous solution of NaHCO<sub>3</sub> (100 mL). The reaction mixture was diluted with Et<sub>2</sub>O (150 mL) and the organic layer was washed with H<sub>2</sub>O (3 x 100 mL). The combined aqueous layer was extracted with Et<sub>2</sub>O (3 x 50 mL) and the organic layers were combined and washed with brine. The combined organic layer was dried over MgSO<sub>4</sub>, filtered, and concentrated under reduced pressure. The crude product was used without further purification.

**Grignard Addition into SI-43.** Anhydrous CeCl<sub>3</sub> (579 mg, 2.35 mmol, 1.0 equiv) was added to a solution of **SI-43** (500 mg, 2.35 mmol, 1.0 equiv) in anhydrous THF (10 mL, 0.25 M w.r.t. **SI-43**) and sonicated under positive pressure of argon for 30 minutes at ambient temperature. The reaction mixture was cooled to 0 °C and vigorously stirred for 15 minutes. Grignard reagent (1.5 equiv) was added rapidly in a single portion to the reaction mixture with vigorous stirring. The reaction was stirred at 0 °C for 30 min and then allowed to warm to ambient temperature and stirred for 1 h. The reaction was then poured onto a vigorously stirred solution of EtOAc (50 mL) and a 15% aqueous solution of NH<sub>4</sub>Cl (100 mL) at 0 °C. The aqueous layer was extracted with EtOAc (3 x 30 mL). The combined organic layer was washed with brine (50 mL), dried over MgSO<sub>4</sub>, filtered, and concentrated under reduced pressure to afford crude *cis*- and *trans*-cyclohexanediols in a ca. 1:1 ratio. The crude product was used without further purification.

**TMS Deprotection.** The crude product was treated with TBAF (7.0 mL, 1.0 M solution in THF, 3.0 equiv) and stirred at ambient temperature for 2 h. The reaction mixture was quenched by addition of saturated aqueous solution of NH<sub>4</sub>Cl (25 mL). The aqueous layer was extracted with EtOAc (3 x 30 mL) and the combined organic layer was dried with Na<sub>2</sub>SO<sub>4</sub>, filtered, and concentrated under reduced pressure. The crude product was purified by flash chromatography (40% v/v EtOAc/hexanes) to afford the *trans*-cyclohexanediol as a white crystalline solid. The relative stereochemistry was assigned by NOESY correlation.



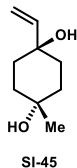

**Allylic Alcohol SI-45.** The General Procedure for Preparation of *trans*-cyclohexanediols was used to prepare **SI-45** using MeMgBr (1.2 mL, 3.0 M solution in Et<sub>2</sub>O). The crude product after TMS deprotection was purified by flash chromatography to afford **SI-45** as a white crystalline solid (130 mg, 0.83 mmol, 35% yield from **SI-42**).

<sup>1</sup>H NMR (600 MHz, CDCl<sub>3</sub>, 25 °C):

|                                    |                    |
|------------------------------------|--------------------|
| δ 5.98 (dd, J = 17.4, 10.8 Hz, 1H) | 1.90-1.79 (m, 4H), |
| 5.26 (dd, J = 17.4, 1.2 Hz, 1H)    | 1.52-1.43 (m, 4H)  |
| 5.04 (dd, J = 10.8, 1.2 Hz, 1H)    | 1.27 (s, 3H)       |

<sup>13</sup>C NMR (151 MHz, CDCl<sub>3</sub>, 25 °C):

|         |      |
|---------|------|
| δ 146.3 | 34.0 |
| 111.3   | 32.7 |
| 71.1    | 31.3 |
| 68.8    |      |

LRMS (ESI) calculated for C<sub>9</sub>H<sub>16</sub>O<sub>2</sub> [M+Na]<sup>+</sup>: 179.1, found: 179.1

TLC: R<sub>f</sub> = 0.20 (40% EtOAc/Hex)

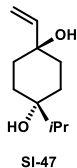

**Allylic Alcohol SI-47.** The General Procedure for Preparation of *trans*-cyclohexanediols was used to prepare **SI-47** using *i*PrMgCl (1.6 mL, 2.0 M solution in THF). The crude product after TMS deprotection was purified by flash chromatography to afford **SI-47** as a white crystalline solid (150 mg, 0.81 mmol, 34% yield from **SI-42**).

<sup>1</sup>H NMR (600 MHz, CDCl<sub>3</sub>, 25 °C):

|                                    |                                 |
|------------------------------------|---------------------------------|
| δ 5.98 (dd, J = 17.4, 10.8 Hz, 1H) | 1.79 (td, J = 13.6, 4.0 Hz, 2H) |
| 5.25 (dd, J = 17.4, 1.2 Hz, 1H)    | 1.62 (dq, J = 13.8, 6.9 Hz, 1H) |
| 5.02 (dd, J = 10.7, 1.2 Hz, 1H)    | 1.45 (dt, J = 14.7, 2.9 Hz, 4H) |
| 1.88 (td, J = 13.5, 4.0 Hz, 2H)    | 0.94 (d, J = 6.9 Hz, 6H)        |

<sup>13</sup>C NMR (151 MHz, CDCl<sub>3</sub>, 25 °C):

|         |      |
|---------|------|
| δ 146.6 | 38.5 |
| 111.1   | 32.5 |
| 72.5    | 29.0 |
| 71.3    | 16.8 |

LRMS (ESI) calculated for C<sub>11</sub>H<sub>20</sub>O<sub>2</sub> [M+Na]<sup>+</sup>: 179.1, found: 179.1

TLC: R<sub>f</sub> = 0.60 (40% EtOAc/Hex)

**General Procedure VII. catalytic asymmetric radical-polar crossover hydroalkoxylation of allylic alcohols.**

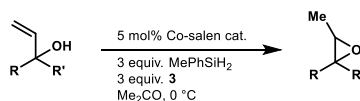

To an oven dried 2 dram vial was added Co-salen catalyst **8** (5.7 mg, 0.005 mmol, 0.05 equiv) and oxidant **3** (87 mg, 0.30 mmol, 3.0 equiv). The vial was then placed under an atmosphere of nitrogen. The allylic alcohol (0.10 mmol, 1.0 equiv) was added as a solution in dry acetone (0.10 M w.r.t. allylic alcohol). The resulting solution was sparged with argon and simultaneously subjected to sonication for 5 min. After cooling to -40 °C in an immersion cooler, MePhSiH<sub>2</sub> (41  $\mu$ L, 0.30 mmol, 3.0 equiv) was added at a rate of 1 drop/10 s. The reaction quickly developed a bright orange color. After 12-72 h, the reaction was quenched by the dropwise addition of pyridine as a degassed solution in dry acetone (0.1 M) and allowed to warm to ambient temperature following addition. The reaction was diluted with CH<sub>2</sub>Cl<sub>2</sub> (5 mL), washed with sat. aq. NH<sub>4</sub>Cl. The aqueous phase was extracted with CH<sub>2</sub>Cl<sub>2</sub> (3 x 5 mL) and the combined organic layer was washed with brine, dried over Na<sub>2</sub>SO<sub>4</sub>, filtered, and concentrated under reduced pressure. The products were isolated using flash column chromatography. NOTE: <sup>1</sup>H NMR yields of epoxides **2** and **15** in radical-polar crossover epoxidations were determined by using acetone-d<sub>6</sub> and obtaining <sup>1</sup>H NMR of the crude reaction mixture after quenching with pyridine.

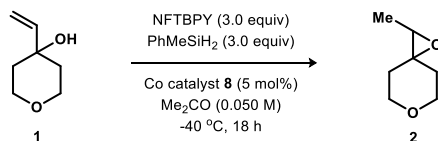

**Epoxide 2.** Epoxide **2** was prepared according to General Procedure VII with allylic alcohol **1** (13 mg, 0.10 mmol) to afford epoxide **2** in 69% yield by <sup>1</sup>H NMR with mesitylene as the internal standard. Spectral data match those reported in the literature.<sup>9</sup> Epoxide **2** is volatile and losses of 20-30% of the product are observed after purification by flash silica chromatography. NOTE: A racemic standard of epoxide **2** was prepared according to the previously reported procedure.<sup>9</sup>

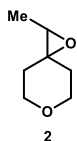

Chiral GC/FID: HP – chiral – 20B column, 6.88 psi, 0.50 mL/min, 80 °C, 75 min, t<sub>R</sub> = 70.2, 74.0 min.

[ $\alpha$ ]<sub>D</sub><sup>25</sup> = 10.8 ° (c = 0.90, CHCl<sub>3</sub>); 95% ee.

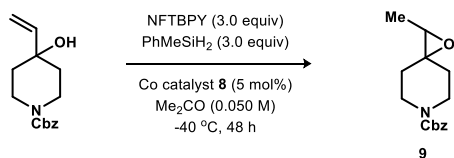

**Epoxide 9.** Epoxide **9** was prepared according to General Procedure VII with 1-carboxybenzyl-4-vinylpiperidin-4-ol<sup>11</sup> (28 mg, 0.10 mmol) and purified by flash chromatography (30% v/v EtOAc in hexanes) to afford epoxide **9** as a clear oil (18.5 mg, 71% yield). NOTE: A racemic standard of epoxide **9** was prepared according to the previously reported procedure for radical polar crossover epoxidation using racemic catalyst **4**.<sup>9</sup>

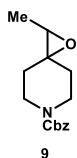

### Epoxide 9

<sup>1</sup>H NMR (500 MHz, CDCl<sub>3</sub>, 25 °C):

|                                      |                                  |
|--------------------------------------|----------------------------------|
| δ 7.35 (dd, J = 10.4, 3.2 Hz, 4H)    | 2.93 (q, J = 5.5 Hz, 1H)         |
| 7.32 (ddd, J = 8.5, 5.0, 3.6 Hz, 1H) | 1.79 (s, 2H)                     |
| 5.15 (s, 2H)                         | 1.47 (dd, J = 59.2, 12.0 Hz, 3H) |
| 3.83 (s, 2H)                         | 1.30 (d, J = 5.6 Hz, 3H)         |
| 3.49-3.41 (m, 2H)                    | 1.26 (s, 1H)                     |

<sup>13</sup>C NMR (126 MHz, CDCl<sub>3</sub>, 25 °C):

|         |        |       |
|---------|--------|-------|
| δ 155.2 | 127.88 | 42.50 |
| 136.7   | 67.2   | 42.47 |
| 128.5   | 60.5   | 13.4  |
| 128.01  | 59.6   |       |

LRMS (ESI) calc. for C<sub>15</sub>H<sub>19</sub>NO<sub>3</sub>Na [M+Na]<sup>+</sup>: 284.1, found: 284.1.

TLC R<sub>f</sub> = 0.36 (40% v/v EtOAc in hexanes)

Chiral SFC: CHIRALCEL OD-H, 5% *i*PrOH, 2.0 mL/min, 210 nm, 40 °C, nozzle pressure = 200 bar CO<sub>2</sub>, t<sub>R</sub> = 8.6, 9.4 min.

[α]<sub>D</sub><sup>25</sup> = +5.35 ° (c = 0.9, CHCl<sub>3</sub>); 89% ee.

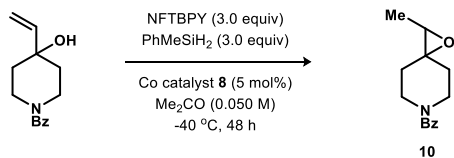

**Epoxide 10.** Epoxide **10** was prepared according to General Procedure VII with 1-benzoyl-4-vinylpiperidin-4-ol<sup>12</sup> (13 mg, 0.10 mmol) and purified by flash chromatography (60% v/v EtOAc in hexanes) to afford epoxide **10** as a clear oil (16.3 mg, 68% yield). NOTE: A racemic standard of epoxide **10** was prepared according to the previously reported procedure for radical polar crossover epoxidation using racemic catalyst **4**.<sup>9</sup>

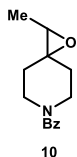

### Epoxide 10

<sup>1</sup>H NMR (600 MHz, DMSO-d<sub>6</sub>, 100 °C):

|                                  |                                              |
|----------------------------------|----------------------------------------------|
| δ 7.44 (td, J = 4.3, 2.3 Hz, 2H) | 1.76 (dddd, J = 22.6, 13.6, 8.9, 4.5 Hz, 2H) |
| 7.41-7.40 (m, 2H)                | 1.56-1.52 (m, 1H)                            |
| 3.65 (s, 2H)                     | 1.47-1.43 (m, 1H)                            |
| 3.50 (t, J = 10.4 Hz, 2H)        | 1.26 (t, J = 8.4 Hz, 4H).                    |
| 2.93 (q, J = 5.5 Hz, 1H)         |                                              |

<sup>13</sup>C NMR (151 MHz, DMSO-d<sub>6</sub>, 100 °C):

|         |       |      |
|---------|-------|------|
| δ 168.8 | 126.1 | 28.1 |
| 136.0   | 59.5  | 12.7 |
| 128.7   | 58.1  |      |
| 127.8   | 33.7  |      |

LRMS (ESI) calc. for C<sub>14</sub>H<sub>17</sub>NO<sub>2</sub>Na [M+Na]<sup>+</sup>: 254.1, found: 254.1.

TLC R<sub>f</sub> = 0.50 (EtOAc)

Chiral SFC: CHIRALCEL OJ-H, 1% *i*PrOH, 2.0 mL/min, 254 nm, 44 °C, nozzle pressure = 200 bar CO<sub>2</sub>, t<sub>R</sub> = 4.9, 5.3 min.

[α]<sub>D</sub><sup>25</sup> = -3.75 ° (c = 0.80, CHCl<sub>3</sub>); 87% ee.

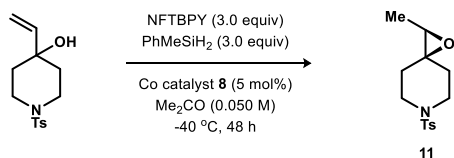

**Epoxide 11.** Epoxide **11** was prepared according to General Procedure VII with 1-tosyl-4-vinylpiperidin-4-ol<sup>13</sup> (30.4 mg, 0.10 mmol) and purified by flash chromatography (25% v/v EtOAc in hexanes) to afford epoxide **11** as a white crystalline solid (17.6 mg, 51% yield). X-ray quality crystals were obtained by slow evaporation of a solution of epoxide **11** in CH<sub>2</sub>Cl<sub>2</sub>. NOTE: A racemic standard of epoxide **11** was prepared according to the previously reported procedure for radical polar crossover epoxidation using racemic catalyst **4**.<sup>9</sup>

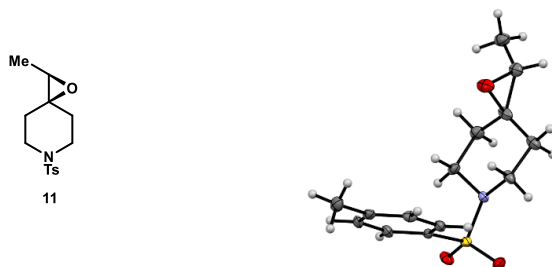

### Epoxide 11

<sup>1</sup>H NMR (600 MHz, CDCl<sub>3</sub>, 25 °C):

|                                              |                                             |
|----------------------------------------------|---------------------------------------------|
| δ 7.65 (d, J = 8.3 Hz, 2H)                   | 2.44 (s, 3H)                                |
| 7.32 (d, J = 7.9 Hz, 2H)                     | 2.05-1.95 (m, 2H)                           |
| 3.54 (ddtd, J = 24.3, 11.4, 4.7, 1.6 Hz, 2H) | 1.54 (dddd, J = 13.7, 4.6, 3.1, 1.7 Hz, 1H) |
| 2.88 (q, J = 5.5 Hz, 1H)                     | 1.37 (dddd, J = 13.6, 4.5, 3.1, 1.7 Hz, 1H) |
| 2.78 (dtd, J = 14.3, 11.2, 3.2 Hz, 2H)       | 1.24 (d, J = 5.5 Hz, 3H).                   |

<sup>13</sup>C NMR (151 MHz, CDCl<sub>3</sub>, 25 °C):

|         |       |      |
|---------|-------|------|
| δ 143.7 | 59.53 | 33.9 |
| 133.0   | 59.51 | 28.3 |
| 129.7   | 44.67 | 21.5 |
| 127.7   | 44.60 | 13.3 |

LRMS (ESI) calc. for C<sub>14</sub>H<sub>19</sub>NO<sub>3</sub>Na [M+Na]<sup>+</sup>: 304.1, found: 304.1.

TLC R<sub>f</sub> = 0.52 (40% v/v EtOAc in hexanes)

Chiral SFC: CHIRALPAK AD, 20% *i*PrOH, 2.0 mL/min, 210 nm, 40 °C, nozzle pressure = 200 bar CO<sub>2</sub>, t<sub>R</sub> = 4.1, 5.5 min.

[α]<sub>D</sub><sup>25</sup> = 1.88 ° (c = 1.13, CHCl<sub>3</sub>); 95% ee.

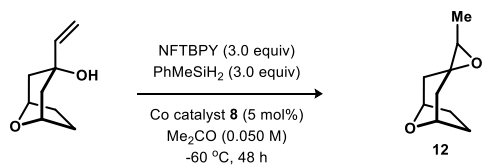

**Epoxide 12.** Epoxide **12** was prepared according to General Procedure VII with 3-vinyl-8-oxabicyclo[3.2.1]octan-3-ol<sup>9</sup> (15.4 mg, 0.10 mmol) and purified by flash chromatography to afford epoxide **12** as a clear oil (10.8 mg, 70% yield). Spectral data match those reported in the literature.<sup>9</sup>

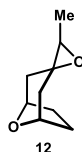

Chiral GC/FID: HP – chiral – 20B column, 6.88 psi, 0.50 mL/min, 105 °C, 120 min,  $t_R$  = 76.9, 78.7.

$[\alpha]_D^{25}$  = 6.1 ° (c = 0.30, CHCl<sub>3</sub>); 93% ee.





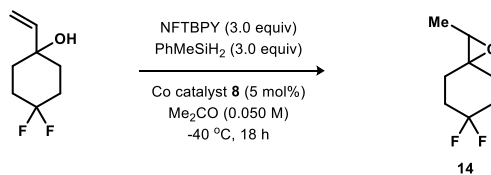

**Epoxide 14.** Epoxide **14** was prepared according to General Procedure VII with 4,4-difluoro-1-vinylcyclohexan-1-ol<sup>9</sup> (13 mg, 0.10 mmol) to afford epoxide **14** in 53% yield by <sup>1</sup>H NMR with mesitylene as the internal standard. Spectral data match those reported in the literature.<sup>9</sup> NOTE: Epoxide **14** is volatile and losses of 20-30% of the product are observed after purification by flash silica chromatography.

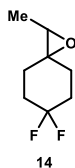

Chiral GC/FID: HP – chiral – 20B column, 6.88 psi, 0.50 mL/min, 80 °C, 75 min  $t_R$  = 53.0, 56.5.

$[\alpha]_D^{25} = 11.2^\circ$  (c = 0.90, CHCl<sub>3</sub>); 88% ee.

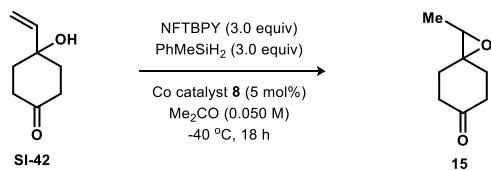

**Epoxide 15.** Epoxide **15** was prepared according to General Procedure VII with allylic alcohol **SI-42** (14.0 mg, 0.10 mmol) and purified by flash chromatography (20% v/v EtOAc in hexanes) to afford epoxide **15** as a clear oil (7.8 mg, 56% yield). NOTE: A racemic standard of epoxide **15** was prepared according to the previously reported procedure for radical polar crossover epoxidation using racemic catalyst **4**.<sup>9</sup>

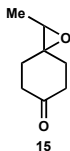

<sup>1</sup>H NMR (600 MHz, CDCl<sub>3</sub>, 25 °C):

|                            |                                       |
|----------------------------|---------------------------------------|
| δ 3.09 (q, J = 5.5 Hz, 1H) | 1.88 (dtd, J = 13.9, 5.8, 2.3 Hz, 1H) |
| 2.70-2.60 (m, 2H)          | 1.76 (dtd, J = 13.8, 5.7, 2.3 Hz, 1H) |
| 2.47-2.40 (m, 2H)          | 1.37 (d, J = 5.6 Hz, 3H)              |
| 2.11-2.02 (m, 2H)          |                                       |

<sup>13</sup>C NMR (151 MHz, CDCl<sub>3</sub>, 25 °C):

|         |       |
|---------|-------|
| δ 210.4 | 38.60 |
| 60.4    | 33.6  |
| 60.1    | 27.7  |
| 38.69   | 14.0  |

LRMS (ESI) calc. for C<sub>8</sub>H<sub>12</sub>O<sub>2</sub> [M+Na]<sup>+</sup>: 140.1, found: 140.1

TLC R<sub>f</sub> = 0.34 (40% EtOAc/Hex)

Chiral GC/FID: HP – chiral – 20B column, 6.88 psi, 0.50 mL/min, 100 °C, 120 min t<sub>R</sub> = 114.7, 116.1

[α]<sub>D</sub><sup>25</sup> = +13.2 ° (c = 0.40, CHCl<sub>3</sub>); 89% ee.

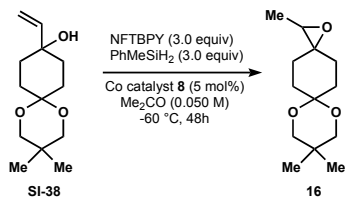

**Epoxide 16.** Epoxide **16** was prepared according to General Procedure VII with allylic alcohol **SI-38** (22.6 mg, 0.10 mmol) and purified by flash chromatography (20% v/v EtOAc in hexanes) to afford epoxide **16** as a clear oil (19.9 mg, 88% yield). NOTE: A racemic standard of epoxide **16** was prepared according to the previously reported procedure for radical polar crossover epoxidation using racemic catalyst **4**.<sup>9</sup>

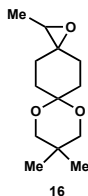

<sup>1</sup>H NMR (600 MHz, CDCl<sub>3</sub>, 25 °C):

|                                        |                                 |
|----------------------------------------|---------------------------------|
| δ 3.53 (s, 2H)                         | 1.58-1.53 (m, 1H)               |
| 3.49 (s, 2H)                           | 1.48-1.42 (m, 1H)               |
| 2.89 (q, <i>J</i> = 5.6 Hz, 1H)        | 1.28 (d, <i>J</i> = 5.6 Hz, 3H) |
| 2.01-1.87 (m, 4H)                      | 0.98 (s, 3H)                    |
| 1.72 (td, <i>J</i> = 11.7, 4.2 Hz, 2H) | 0.96 (s, 3H)                    |

<sup>13</sup>C NMR (151 MHz, CDCl<sub>3</sub>, 25 °C):

|        |       |       |
|--------|-------|-------|
| δ 97.3 | 30.9  | 22.77 |
| 70.32  | 30.35 | 22.72 |
| 70.13  | 30.25 | 13.7  |
| 61.8   | 30.10 |       |
| 59.7   | 24.6  |       |

HRMS (ESI) calc. for C<sub>13</sub>H<sub>22</sub>O<sub>3</sub> [M+Na]<sup>+</sup>: 249.1467, found: 249.1468

TLC R<sub>f</sub> = 0.47 (30% EtOAc/Hex)

Chiral GC/FID: HP – chiral – 20B column, 6.88 psi, 0.50 mL/min, 130 °C, 180 min t<sub>R</sub> = 163.4, 167.5.

[α]<sub>D</sub><sup>25</sup> = +8.3 ° (c = 1.0, CHCl<sub>3</sub>); 82% ee.

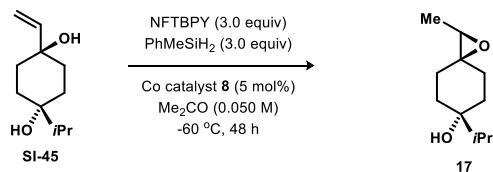

**Epoxide 17.** Epoxide **17** was prepared according to General Procedure VII with allylic alcohol **SI-45** (18.4 mg, 0.10 mmol) and purified by flash chromatography (10% v/v Me<sub>2</sub>CO in CH<sub>2</sub>Cl<sub>2</sub>) to afford epoxide **17** as a clear oil (9.4 mg, 51% yield). NOTE: A racemic standard of epoxide **17** was prepared according to the previously reported procedure for radical polar crossover epoxidation using racemic catalyst **4**.<sup>9</sup>

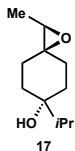

<sup>1</sup>H NMR (600 MHz, CDCl<sub>3</sub>, 25 °C):

|                                        |                                       |
|----------------------------------------|---------------------------------------|
| δ 2.91 (q, J = 5.6 Hz, 1H)             | 1.34 (ddt, J = 13.8, 4.5, 2.8 Hz, 1H) |
| 2.21 (td, J = 13.5, 4.6 Hz, 1H)        | 1.29 (d, J = 5.6 Hz, 3H),             |
| 2.06 (td, J = 13.4, 4.8 Hz, 1H)        | 1.10 (ddt, J = 13.7, 4.5, 2.7 Hz, 1H) |
| 1.74 (dtd, J = 24.4, 13.4, 4.5 Hz, 2H) | 0.98 (s, 1H)                          |
| 1.68-1.63 (m, 2H), 1.60-1.57 (m, 1H)   | 0.95 (d, J = 6.9 Hz, 6H)              |

<sup>13</sup>C NMR (151 MHz, CDCl<sub>3</sub>, 25 °C):

|        |       |
|--------|-------|
| δ 73.2 | 30.0  |
| 62.0   | 23.8  |
| 59.9   | 16.88 |
| 38.3   | 16.86 |
| 31.36  | 13.4  |

LRMS (ESI) calc. for C<sub>11</sub>H<sub>20</sub>O<sub>2</sub> [M+Na]<sup>+</sup>: 184.1, found: 184.1

TLC R<sub>f</sub> = 0.44 (40% EtOAc/Hex)

Chiral GC/FID: HP – chiral – 20B column, 6.88 psi, 0.50 mL/min, 110 °C, 180 min, then ramp to 200 °C at 10 °C per minute, t<sub>R</sub> = 188.4, 188.7

[α]<sub>D</sub><sup>25</sup> = +8.66° (c = 0.60, CHCl<sub>3</sub>); 86% ee.

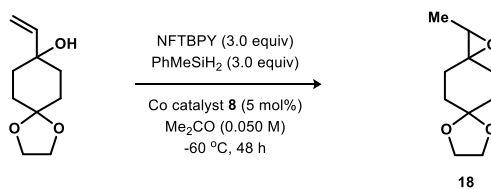

**Epoxide 18.** Epoxide **18** was prepared according to General Procedure VII with 8-vinyl-1,4-dioxaspiro[4.5]decan-8-ol<sup>9</sup> (18.4 mg, 0.10 mmol) and purified by flash chromatography to afford epoxide **18** as a clear oil (10.3 mg, 56% yield). Spectral data match those reported in the literature.<sup>9</sup>

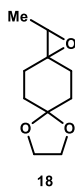

Chiral GC/FID: HP – chiral – 20B column, 6.88 psi, 0.50 mL/min, 110 °C, 180 min ramp to 150 °C, 40 min t<sub>R</sub> = 179.1, 181.4.

[ $\alpha$ ]<sub>D</sub><sup>25</sup> = 7.5 ° (c = 0.30, CHCl<sub>3</sub>); 92% ee.

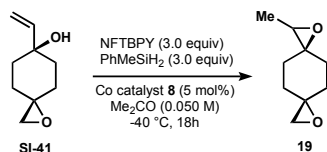

**Epoxide 19.** Prepared according to General Procedure VII using vinylcyclohexanol **SI-41** (15.4 mg, 0.10 mmol). The crude was chromatographed (gradient elution: 100% pentane to 15% v/v Et<sub>2</sub>O/pentane) to afford 7.5 mg (49% yield) of **19** as a clear colorless oil. NOTE: A racemic standard of epoxide **19** was prepared according to the previously reported procedure for radical polar crossover epoxidation using racemic catalyst **4**.<sup>9</sup>

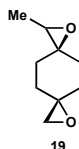

#### Epoxide **19**

<sup>1</sup>H NMR (500 MHz, CDCl<sub>3</sub>, 25 °C):

|                                   |                                 |
|-----------------------------------|---------------------------------|
| δ 2.96 (q, <i>J</i> = 5.6 Hz, 1H) | 1.62-1.57 (m, 2H)               |
| 2.71 (s, 2H)                      | 1.50-1.46 (m, 2H)               |
| 2.13-2.01 (m, 3H)                 | 1.33 (d, <i>J</i> = 5.6 Hz, 3H) |
| 2.01-1.95 (m, 1H)                 |                                 |

<sup>13</sup>C NMR (126 MHz, CDCl<sub>3</sub>, 25 °C):

|        |      |
|--------|------|
| δ 61.4 | 32.5 |
| 60.1   | 30.8 |
| 58.3   | 26.3 |
| 54.3   | 13.6 |

LRMS (ESI) calculated for C<sub>9</sub>H<sub>14</sub>O<sub>2</sub> [M+Na]<sup>+</sup>: 177.0892, found: 177.3611

TLC: R<sub>f</sub> = 0.41 (40% EtOAc/Hex)

Chiral GC/FID: HP – chiral – 20B column, 6.88 psi, 0.50 mL/min, 110 °C, 90 min t<sub>R</sub> = 61.6, 64.5.

[α]<sub>D</sub><sup>22</sup> = +10.3 (c = 0.5, CDCl<sub>3</sub>); 91% ee.

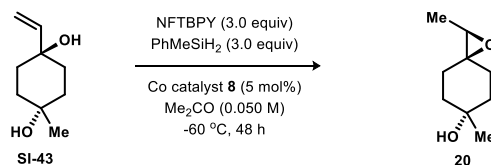

**Epoxide 20.** Epoxide **20** was prepared according to General Procedure VII with allylic alcohol **SI-43** (15.6 mg, 0.10 mmol) and purified by flash chromatography (40% v/v EtOAc in hexanes) to afford epoxide **20** as a clear oil (9.8 mg, 63% yield). NOTE: A racemic standard of epoxide **20** was prepared according to the previously reported procedure for radical polar crossover epoxidation using racemic catalyst **4**.<sup>9</sup>

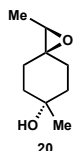

<sup>1</sup>H NMR (600 MHz, CDCl<sub>3</sub>, 25 °C):

|                                        |                                       |
|----------------------------------------|---------------------------------------|
| δ 2.91 (q, J = 5.6 Hz, 1H)             | 1.63 (dtd, J = 13.6, 4.4, 2.3 Hz, 1H) |
| 2.09 (ddd, J = 13.6, 12.3, 4.6 Hz, 1H) | 1.37 (dtd, J = 13.8, 4.4, 2.1 Hz, 1H) |
| 1.98 (ddd, J = 13.8, 11.9, 4.8 Hz, 1H) | 1.30 (s, 3H)                          |
| 1.75 (dtd, J = 24.7, 12.4, 4.5 Hz, 2H) | 1.29 (d, J = 5.6 Hz, 3H)              |
| 1.68 (dtd, J = 13.6, 4.6, 2.4 Hz, 1H)  | 1.20-1.16 (m, 1H)                     |

<sup>13</sup>C NMR (151 MHz, CDCl<sub>3</sub>, 25 °C):

|        |       |
|--------|-------|
| δ 69.5 | 30.57 |
| 61.7   | 30.43 |
| 59.9   | 24.2  |
| 36.50  | 13.5  |
| 36.49  |       |

LRMS (ESI) calc. for C<sub>9</sub>H<sub>16</sub>O<sub>2</sub> [M+Na]<sup>+</sup>: 156.1, found: 156.1

TLC R<sub>f</sub> = 0.24 (40% EtOAc/Hex)

Chiral GC/FID: HP – chiral – 20B column, 6.88 psi, 0.50 mL/min, 130 °C, 30 min t<sub>R</sub> = 17.8, 18.9

[α]<sub>D</sub><sup>25</sup> = +2.1 ° (c = 0.60, CHCl<sub>3</sub>); 86% ee.

## Eyring Data

NOTE: The following Eyring analysis is based on those employed in Jacobsen's seminal publication on cation- $\pi$  interactions in the context of thiourea-catalyzed cationic polycyclizations.<sup>14</sup>

### General Procedure VIII. Eyring analysis of dependence of enantioenrichment on temperature

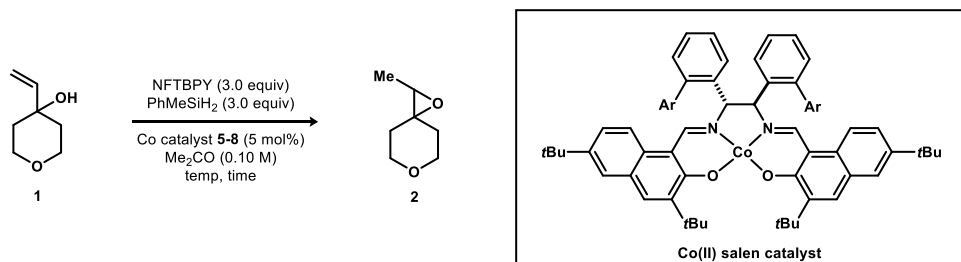

To an oven dried 2 dram vial was added Co-salen catalyst (0.00125 mmol, 0.050 equiv) and oxidant **3** (22 mg, 0.15 mmol, 3.0 equiv). The vial was then placed under an atmosphere of nitrogen. Allylic alcohol **1** (0.025 mmol, 1.0 equiv) was added as a solution in dry acetone (500  $\mu$ L, 0.10 M w.r.t. allylic alcohol). The resulting solution was sparged with argon and simultaneously subjected to sonication for 5 min. The reaction mixture was submerged in a bath at the specified temperature and allowed to equilibrate for 10 minutes. Then MePhSiH<sub>2</sub> (16  $\mu$ L, 0.075 mmol, 3.0 equiv) was added at a rate of 1 drop/10 s. The reaction quickly developed a bright orange color. Following addition, reactions at temperatures 19 °C and 4 °C were allowed to react for 1 h, reactions at temperature –10 to –20 °C were allowed to react for 4 h, and reactions at –30 to –40 °C were allowed to reaction for 12 h. After the specified amount of time, the reaction was quenched by the dropwise addition of pyridine as a degassed solution in dry acetone (0.1 M) and allowed to warm to ambient temperature following addition. The reaction was diluted with CH<sub>2</sub>Cl<sub>2</sub> (5 mL), washed with sat. aq. NH<sub>4</sub>Cl and brine, dried over Na<sub>2</sub>SO<sub>4</sub>, and filtered. An aliquot was taken out for chiral GC/FID analysis to determine enantioenrichment.



Overlaid Eyring Plot

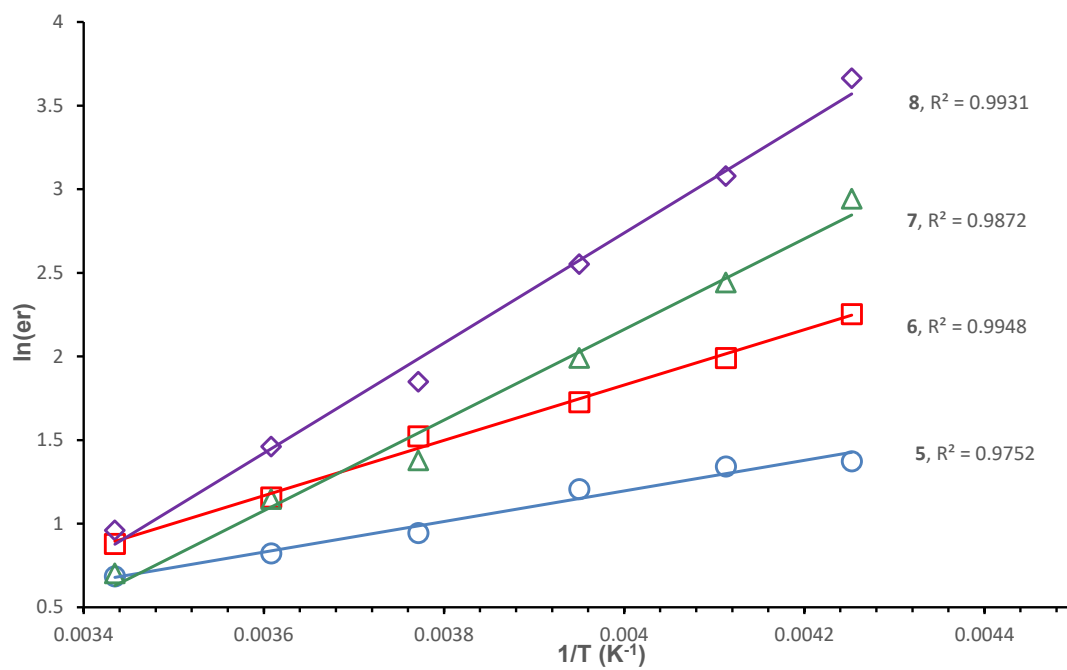

### Eyring data for phenyl-substituted Co(II) salen 5

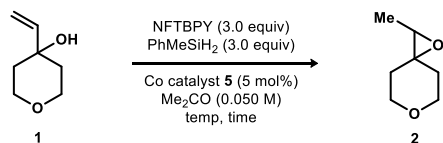

| Entry | T °C | er        |
|-------|------|-----------|
| 1     | 19   | 66.5:33.5 |
| 2     | 4    | 69.5:30.5 |
| 3     | -10  | 72.0:28.0 |
| 4     | -20  | 77.0:23.0 |
| 5     | -30  | 79.3:20.7 |
| 6     | -40  | 79.8:20.2 |

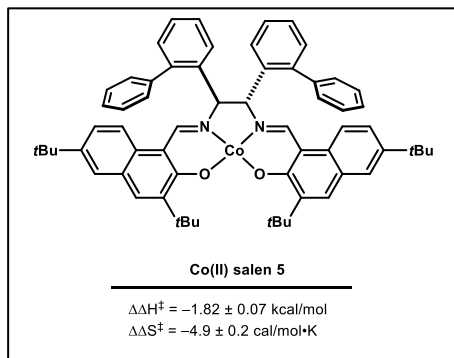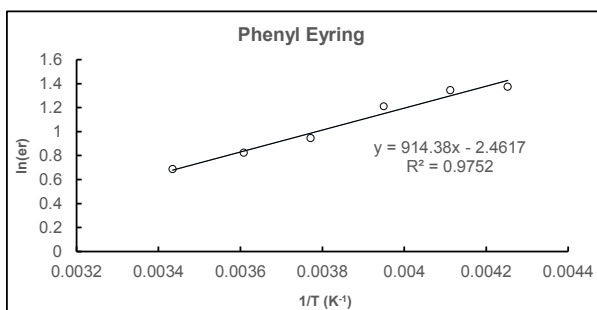

### Eyring data for 2-naphthyl-substituted Co(II) salen 6

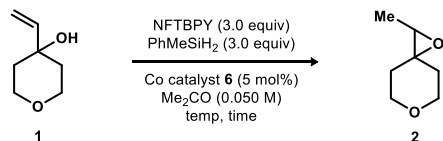

| Entry | T °C | er        |
|-------|------|-----------|
| 1     | 19   | 70.7:29.3 |
| 2     | 4    | 76.1:23.9 |
| 3     | -10  | 82.1:17.9 |
| 4     | -20  | 84.9:15.1 |
| 5     | -30  | 88.0:12.0 |
| 6     | -40  | 90.5:9.5  |

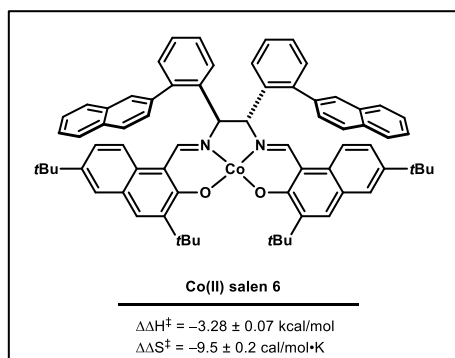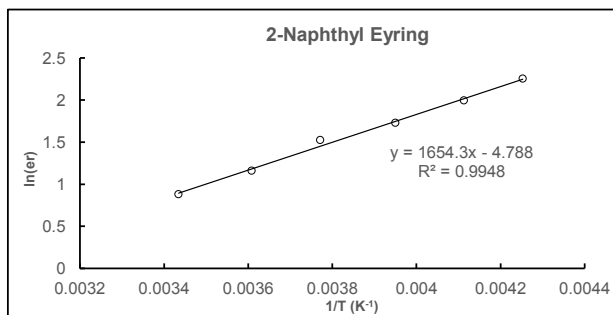

Eyring data for 9-phenanthrenyl-substituted Co(II) salen 7

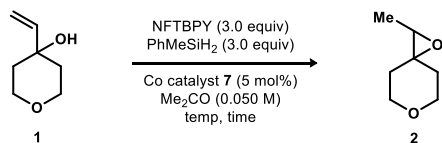

| Entry | T °C | er        |
|-------|------|-----------|
| 1     | 19   | 66.9:33.1 |
| 2     | 4    | 75.9:24.1 |
| 3     | -10  | 79.9:20.1 |
| 4     | -20  | 88.0:12.0 |
| 5     | -30  | 92.0:8.0  |
| 6     | -40  | 95.0:5.0  |

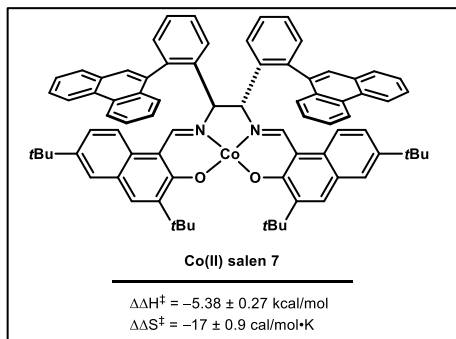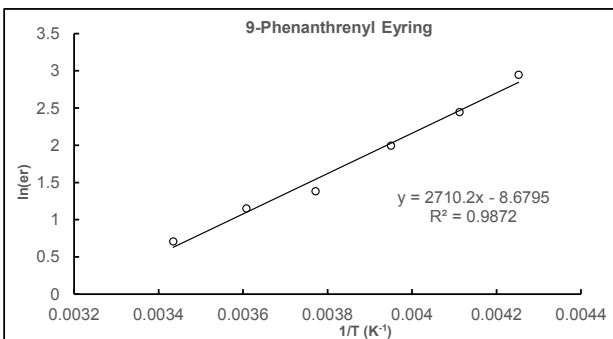

Eyring data for 4-dibenzofuran-substituted Co(II) salen 8

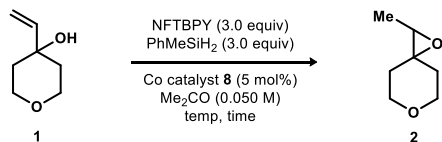

| Entry | T °C | er        |
|-------|------|-----------|
| 1     | 19   | 72.3:27.7 |
| 2     | 4    | 81.2:18.8 |
| 3     | -10  | 86.4:13.6 |
| 4     | -20  | 92.8:7.2  |
| 5     | -30  | 95.6:4.4  |
| 6     | -40  | 97.5:2.5  |

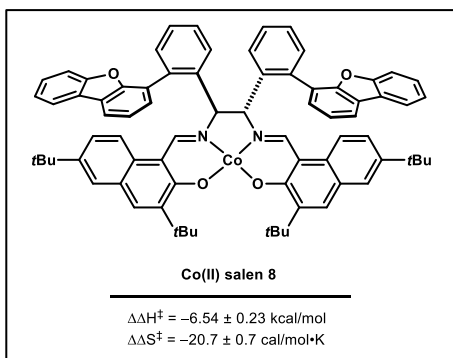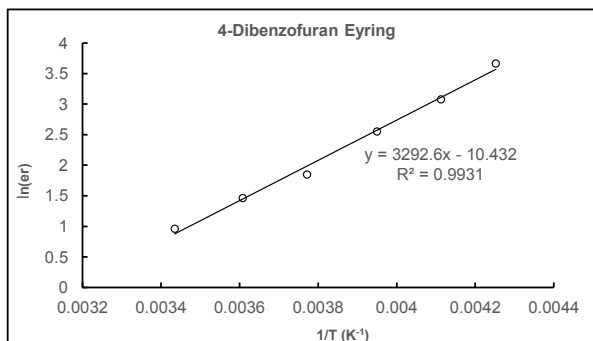

## Correlation of Polarizability and Quadrupole Moment of Aromatic Substituent and Enantioselectivity

NOTE: The following correlations between polarizability and quadrupole moment of arenes and enantioselectivity are based on those employed by the Jacobsen group in their seminal publication on cation- $\pi$  interactions in the context of thiourea-catalyzed cationic polycyclizations.<sup>14</sup> The values for polarizabilities and quadrupole moments were obtained from previous reports of computational calculations for arene properties.<sup>15</sup>

linear correlation of polarizability of catalyst Ar with enantioselectivity

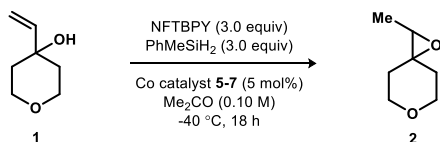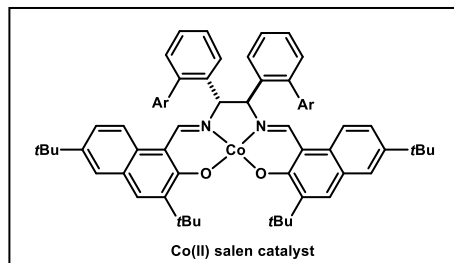

| arene        | polarizability | catalyst | er        |
|--------------|----------------|----------|-----------|
| benzene      | 61.9           | 5        | 79.8:20.2 |
| naphthalene  | 115.5          | 6        | 90.5:9.5  |
| phenanthrene | 173.2          | 7        | 95.0:5.0  |

Polarizabilities: Waite et al. *J. Chem. Phys.* **1982**, 77, 2536.

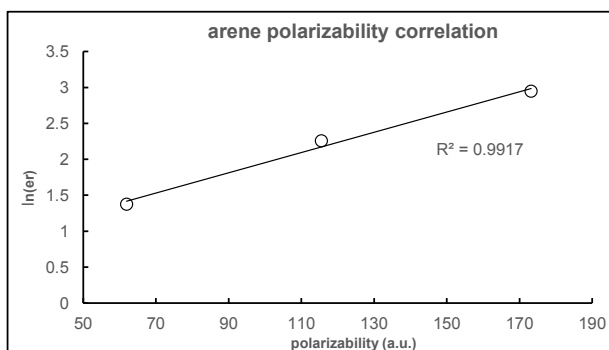

linear correlation of quadrupole moment of catalyst Ar with enantioselectivity

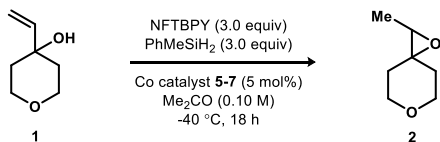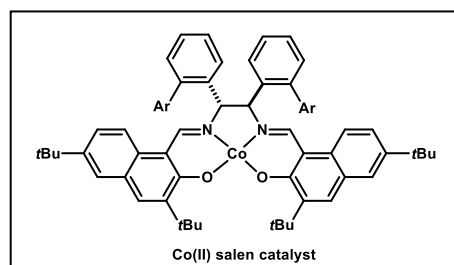

| arene        | quadrupole moment | catalyst | er        |
|--------------|-------------------|----------|-----------|
| benzene      | -8.45             | 5        | 79.8:20.2 |
| naphthalene  | -13.42            | 6        | 90.5:9.5  |
| phenanthrene | -18.48            | 7        | 95.0:5.0  |

Quadrupole moments: Boyd et al. *J. Phys. Chem. A.* **1997**, 101, 5374

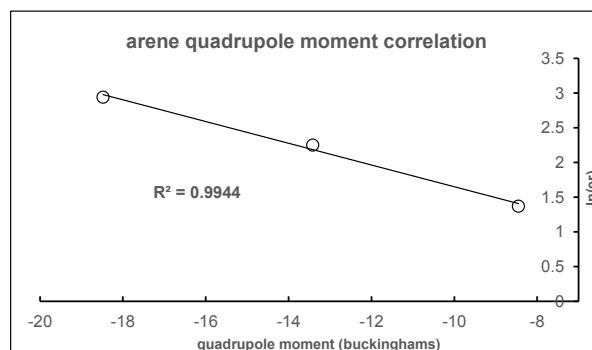

## Derivatization of Enriched Epoxide **11**.

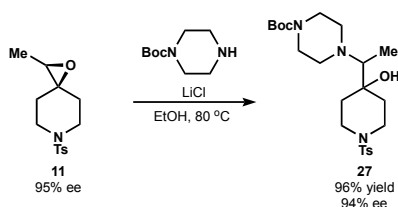

**Aminoalcohol 27.** Enriched epoxide **11** (5.0 mg, 0.018 mmol), 1-boc-piperazine (66.3 mg, 0.356 mmol) and LiCl (16.2 mg, 0.383 mmol) were dissolved in EtOH (0.3 mL) in a 1 dram vial. The vial was sealed with a Teflon cap and the reaction was stirred while heated to 80 °C for 20 h. After cooling to rt, the contents were diluted with DCM, transferred to a separatory funnel and extracted 3x (6 mL each) with DCM from 10 mL of H<sub>2</sub>O. The combined organic layers were dried over Na<sub>2</sub>SO<sub>4</sub>. The crude material was purified by flash silica chromatography (gradient elution: 100% hexanes to 20% v/v EtOAc/hexanes) to yield 8.0 mg (96% yield) of **27** as a tan solid. NOTE: Racemic **27** was prepared by subjecting racemic epoxide **11** to the above conditions.

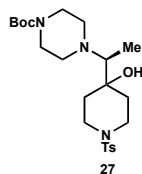

### Aminoalcohol **27**

<sup>1</sup>H NMR (500 MHz, CDCl<sub>3</sub>, 25 °C):

|                                   |                                        |                                        |
|-----------------------------------|----------------------------------------|----------------------------------------|
| δ 7.64 (d, <i>J</i> = 8.2 Hz, 2H) | 3.38 (d, <i>J</i> = 15.3 Hz, 4H)       | 1.83-1.73 (m, 2H)                      |
| 7.30 (d, <i>J</i> = 7.9 Hz, 2H)   | 2.65-2.59 (m, 4H)                      | 1.44 (s, 9H)                           |
| 4.27 (s, 1H)                      | 2.42 (s, 3H)                           | 1.36 (td, <i>J</i> = 22.9, 9.1 Hz, 3H) |
| 3.66-3.64 (m, 2H)                 | 2.37 (dd, <i>J</i> = 14.5, 7.3 Hz, 3H) | 1.01 (d, <i>J</i> = 7.1 Hz, 3H)        |

<sup>13</sup>C NMR (126 MHz, CDCl<sub>3</sub>, 25 °C):

|         |      |      |
|---------|------|------|
| δ 154.6 | 79.9 | 35.2 |
| 143.4   | 69.3 | 32.1 |
| 133.2   | 68.3 | 28.4 |
| 129.6   | 42.8 | 21.5 |
| 127.7   | 42.2 | 8.0  |

HRMS (ESI) calculated for C<sub>23</sub>H<sub>37</sub>N<sub>3</sub>O<sub>5</sub>S [M+H]<sup>+</sup>: 468.2532, found: 468.2534

TLC: R<sub>f</sub> = 0.47 (50% EtOAc/Hex)

Chiral SFC: CHIRALCEL OJ-H, 5% *i*PrOH, 2.0 mL/min, 240 nm, 44 °C, nozzle pressure = 200 bar CO<sub>2</sub>, t<sub>R</sub> = 9.2, 15.2 min.

[α]<sub>D</sub><sup>22</sup> = +43.1 (*c* = 1.0, CDCl<sub>3</sub>); 94% ee

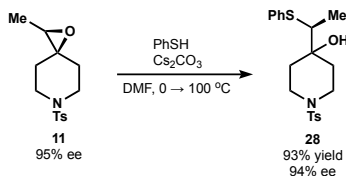

**Hydroxysulfide 28.** Enriched epoxide **11** (5.0 mg, 0.018 mmol) and  $\text{Cs}_2\text{CO}_3$  (57.8 mg, 0.178 mmol) were added to a flame dried Schlenk which was then evacuated and backfilled 3x with  $\text{N}_2$ .<sup>16</sup> Dry DMF was added and the suspension was degassed by freeze-pump-thaw. The mixture was cooled to 0 °C and PhSH (18.2  $\mu\text{L}$ , 0.178 mmol) was added dropwise. The reaction was then transferred to an oil bath and heated to 100 °C. After 2 h the reaction was removed from heat and quenched with sat. aq.  $\text{NH}_4\text{Cl}$ . The mixture was extracted with DCM 3x (6 mL each) and the organic layers dried over  $\text{Na}_2\text{SO}_4$ . The crude material was purified by flash silica chromatography (gradient elution: 100% hexanes to 15% v/v EtOAc/hexanes) to yield 6.5 mg (93% yield) of **28** as a white solid. NOTE: Racemic **28** was prepared by subjecting racemic epoxide **11** to the above conditions.

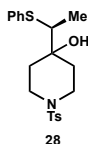

#### Hydroxysulfide **28**

$^1\text{H}$  NMR (500 MHz,  $\text{CDCl}_3$ , 25 °C):

|                                     |                                   |
|-------------------------------------|-----------------------------------|
| $\delta$ 7.64 (d, $J$ = 7.9 Hz, 2H) | 2.65-2.60 (m, 2H)                 |
| 7.40 (d, $J$ = 7.3 Hz, 2H)          | 2.43 (s, 3H)                      |
| 7.31 (d, $J$ = 8.3 Hz, 2H)          | 2.17 (s, 1H)                      |
| 7.28 (d, $J$ = 7.6 Hz, 2H)          | 1.85-1.77 (m, 2H)                 |
| 7.24 (t, $J$ = 7.3 Hz, 1H)          | 1.68 (dd, $J$ = 13.7, 1.8 Hz, 1H) |
| 3.65 (t, $J$ = 14.2 Hz, 2H)         | 1.63 (dd, $J$ = 13.3, 2.0 Hz, 1H) |
| 3.18 (q, $J$ = 7.0 Hz, 1H)          | 1.35 (d, $J$ = 7.1 Hz, 3H)        |

$^{13}\text{C}$  NMR (126 MHz,  $\text{CDCl}_3$ , 25 °C):

|                |       |      |      |
|----------------|-------|------|------|
| $\delta$ 143.5 | 129.7 | 71.2 | 34.8 |
| 135.2          | 129.2 | 57.4 | 32.4 |
| 133.3          | 127.7 | 42.4 | 21.6 |
| 131.9          | 127.4 | 42.0 | 17.2 |

HRMS (ESI) calculated for  $\text{C}_{20}\text{H}_{25}\text{NO}_3\text{S}_2$   $[\text{M}+\text{Na}]^+$ : 414.1174, found: 414.1167

TLC:  $R_f$  = 0.38 (30% EtOAc/Hex)

Chiral SFC: CHIRALCEL OD-H, 20% *i*PrOH, 2.0 mL/min, 254 nm, 44 °C, nozzle pressure = 200 bar  $\text{CO}_2$ ,  $t_R$  = 4.9, 7.1 min.

$[\alpha]_D^{22} = -28.7$  ( $c$  = 1.0,  $\text{CDCl}_3$ ); 94% ee

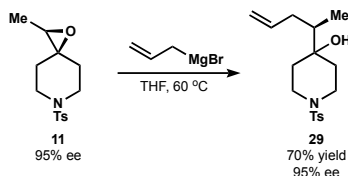

**Hydroxyalkene 29.** Allylmagnesium bromide (1.0 M in Et<sub>2</sub>O, 0.2 mL, 0.2 mmol) was added dropwise to a solution of **11** (9.0 mg, 0.032 mmol) in 0.4 mL of THF at rt. The reaction was stirred for a further 5 min at rt and then heated to 60 °C in an oil bath. After 20 min the reaction was removed from heat and quenched with sat. aq. NH<sub>4</sub>Cl. The mixture was extracted with DCM 3x (6 mL each) and the organic layers dried over Na<sub>2</sub>SO<sub>4</sub>. The crude material was purified by flash silica chromatography (gradient elution: 100% hexanes to 15% v/v EtOAc/hexanes) to yield 7.2 mg (70% yield) of **29** as a tan solid. NOTE: Racemic **29** was prepared by subjecting racemic epoxide **11** to the above conditions.

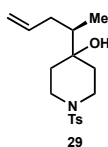

#### Hydroxyalkene **29**

<sup>1</sup>H NMR (500 MHz, CDCl<sub>3</sub>, 25 °C):

|                                              |                                             |
|----------------------------------------------|---------------------------------------------|
| δ 7.65 (d, <i>J</i> = 8.2 Hz, 2H)            | 2.32 (d, <i>J</i> = 13.0 Hz, 1H)            |
| 7.31 (d, <i>J</i> = 7.9 Hz, 2H)              | 1.84-1.70 (m, 3H)                           |
| 5.82-5.74 (m, 1H)                            | 1.58 (t, <i>J</i> = 2.2 Hz, 1H)             |
| 5.05-5.01 (m, 2H)                            | 1.54 (d, <i>J</i> = 2.2 Hz, 1H)             |
| 3.64-3.60 (m, 2H)                            | 1.48 (ddd, <i>J</i> = 9.6, 6.5, 3.3 Hz, 1H) |
| 2.59 (tdd, <i>J</i> = 11.9, 6.3, 2.2 Hz, 2H) | 0.92 (s, 1H)                                |
| 2.43 (s, 3H)                                 | 0.89 (d, <i>J</i> = 6.9 Hz, 3H)             |

<sup>13</sup>C NMR (126 MHz, CDCl<sub>3</sub>, 25 °C):

|         |       |      |
|---------|-------|------|
| δ 143.4 | 116.5 | 35.4 |
| 137.7   | 71.3  | 34.2 |
| 133.3   | 43.2  | 33.0 |
| 129.6   | 42.17 | 21.5 |
| 127.7   | 42.10 | 13.5 |

HRMS (ESI) calculated for C<sub>17</sub>H<sub>25</sub>NO<sub>3</sub>S [M+Na]<sup>+</sup>: 346.1453, found: 346.1462

TLC: R<sub>f</sub> = 0.41 (30% EtOAc/Hex)

Chiral SFC: CHIRALCEL OD-H, 3% *i*PrOH, 2.0 mL/min, 240 nm, 44 °C, nozzle pressure = 200 bar CO<sub>2</sub>, t<sub>R</sub> = 36.8, 40.0 min.

[α]<sub>D</sub><sup>23</sup> = -3.2 (*c* = 1.0, CDCl<sub>3</sub>); 95% ee

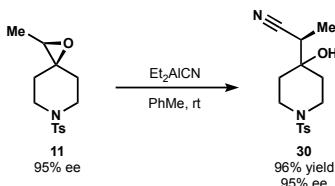

**Hydroxynitrile 30.** Et<sub>2</sub>AlCN (1.0 M in PhMe, 90 μL, 0.09 mmol) was added dropwise to a stirred solution of **11** (5.0 mg, 0.018 mmol) in 0.30 mL of dry PhMe at rt.<sup>17</sup> The reaction was stirred for 18 h and then quenched with sat. aq. NH<sub>4</sub>Cl. The mixture was extracted with DCM 3x (6 mL each) and the organic layers dried over Na<sub>2</sub>SO<sub>4</sub>. The crude material was purified by flash silica chromatography (gradient elution: 100% hexanes to 40% v/v EtOAc/hexanes) to yield 5.3 mg (96% yield) of **30** as a tan solid. NOTE: Racemic **30** was prepared by subjecting racemic epoxide **11** to the above conditions.

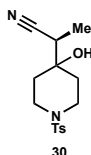

#### Hydroxynitrile **30**

<sup>1</sup>H NMR (500 MHz, CDCl<sub>3</sub>, 25 °C):

|                                   |                                        |
|-----------------------------------|----------------------------------------|
| δ 7.65 (d, <i>J</i> = 8.2 Hz, 2H) | 1.86 (td, <i>J</i> = 13.0, 4.6 Hz, 1H) |
| 7.33 (d, <i>J</i> = 7.9 Hz, 2H)   | 1.79 (dd, <i>J</i> = 13.8, 2.1 Hz, 1H) |
| 3.69 (d, <i>J</i> = 11.4 Hz, 2H)  | 1.73 (q, <i>J</i> = 9.2 Hz, 2H)        |
| 2.63-2.58 (m, 3H)                 | 1.41 (d, <i>J</i> = 0.2 Hz, 1H)        |
| 2.44 (s, 3H)                      | 1.31 (d, <i>J</i> = 7.2 Hz, 3H)        |

<sup>13</sup>C NMR (126 MHz, CDCl<sub>3</sub>, 25 °C):

|         |       |      |
|---------|-------|------|
| δ 143.8 | 120.4 | 34.7 |
| 133.1   | 69.4  | 33.0 |
| 129.8   | 41.7  | 21.6 |
| 127.7   | 38.2  | 12.0 |

HRMS (ESI) calculated for C<sub>15</sub>H<sub>20</sub>N<sub>2</sub>O<sub>3</sub>S [M+Na]<sup>+</sup>: 331.1092, found: 331.1086

TLC: R<sub>f</sub> = 0.24 (50% EtOAc/Hex)

Chiral SFC: CHIRALCEL OJ-H, 20% *i*PrOH, 2.0 mL/min, 254 nm, 44 °C, nozzle pressure = 200 bar CO<sub>2</sub>, t<sub>R</sub> = 2.2, 3.8 min.

[α]<sub>D</sub><sup>22</sup> = -3.9 (*c* = 1.0, CHCl<sub>3</sub>); 95% ee



## References

1. Arnold, D. A.; Natrajan, L. S.; Hall, J. L.; Bird, S. J.; Wilson, C. J. *Organomet. Chem.* **2002**, *647*, 205–215.
2. Damavandi, S.; Samadieh, M.; Ahmadjo, S.; Etemadinia, Z.; Zohuri, G. H. *Eur. Polym. J.* **2016**, *64*, 118–125.
3. Tummatorn, J.; Krajangsri, S.; Norseeda, K.; Thongsornkleeb, C.; Ruchirawat, S. *Org. Biomol. Chem.* **2008**, *106*, 1059–1062.
4. Xu, D.; Duan, Y.; Blair, I. A.; Pennig, T. M.; Harvey, R. G. *Org. Lett.* **2008**, *10*, 1059–1062.
5. Kim, H.; Nguyen, Y.; Lough, A. J.; Chin, J. *Angew. Chem. Int. Ed.* **2008**, *47*, 8678–8681.
6. Niu, J.; Willis, M. C. *Org. Chem. Front.* **2016**, *3*, 625–629.
7. Kabalka, G. W.; Wu, Z.; Yao, M.-L. *Appl. Organometal. Chem.* **2008**, *22*, 516–522.
8. Zipfel, H. F.; Carreira, E. M. *Chem. Eur. J.* **2015**, *21*, 12475–12480.
9. Touney, E. E.; Foy, N. J.; Pronin, S. V. *J. Am. Chem. Soc.* **2018**, *140*, 16982–16987.
10. Carreaux, F.; Posseme, F.; Carboni, B.; Arrieta, A.; Lecea, B.; Cossia, F. P. *J. Org. Chem.* **2002**, *67*, 9153–9161.
11. Zheng, H.; Lejkowski, M.; Hall, D. G. *Chem. Sci.* **2011**, *2*, 1305–1310.
12. Finkelstein, J. A.; Perchonock, C. D. *Tetrahedron Lett.* **1980**, *21*, 3323–3326.
13. Salomon, P.; Zard, S. Z. *Org. Lett.* **2014**, *16*, 2926–2929.
14. Knowles, R. R.; Lin, S.; Jacobsen, E. N. *J. Am. Chem. Soc.* **2010**, *132*, 5030–5032.
15. Polarizabilities: Waite, J.; Papadopoulos, M. G.; Nicolaides, C. A. *J. Chem. Phys.* **1982**, *77*, 2536. Quadrupole Moments: Heard, G. L.; Boyd, R. J. *J. Phys. Chem. A* **1997**, *101*, 5374–5377.
16. Zaimoku, H.; Taniguchi, T. *Chem. Eur. J.* **2014**, *20*, 9613–9619.
17. Neef, G.; Eckle, E.; Müller-Fahrnow, A. *Tetrahedron* **1993**, *49*, 833–840.

# NMR Spectra

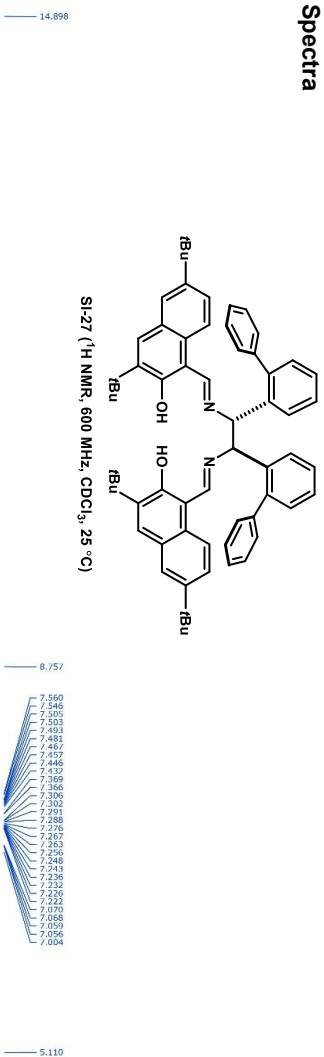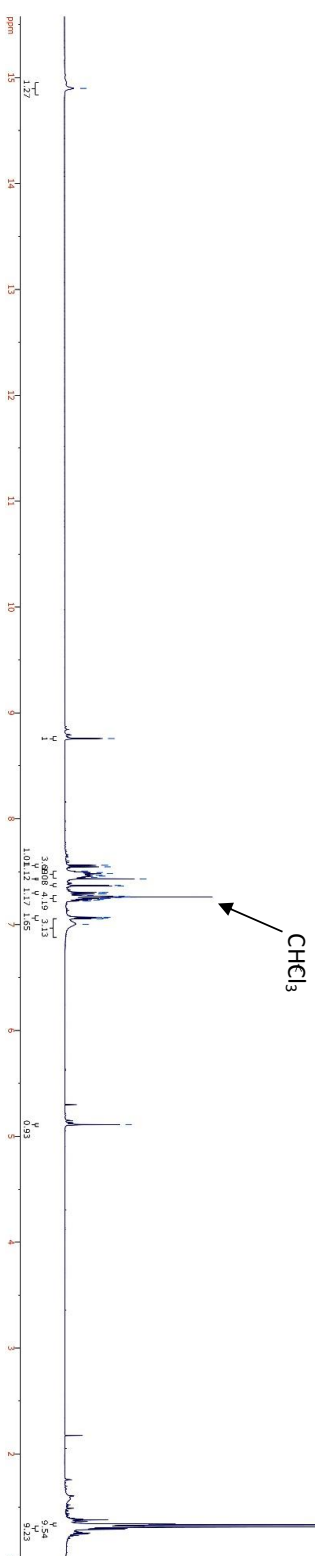

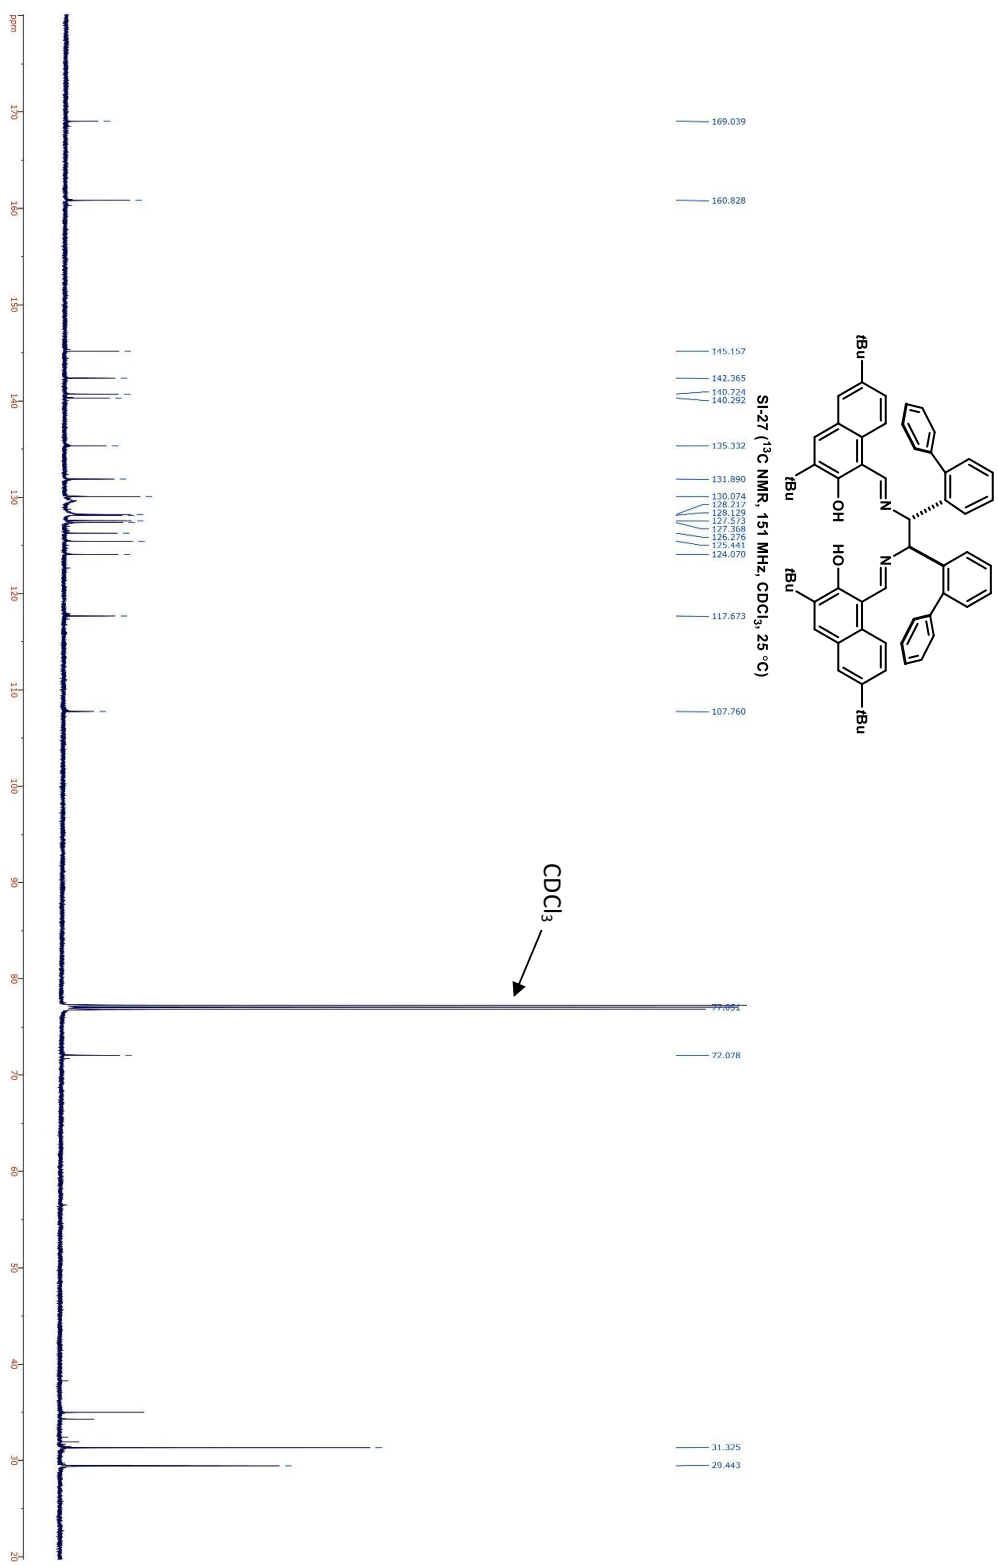

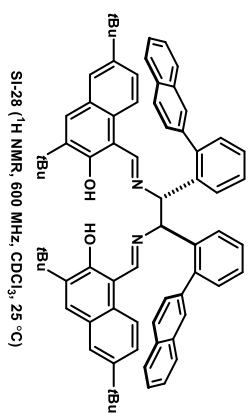

14.902

8.801  
8.026  
8.012  
7.947  
7.881  
7.801  
7.788  
7.781  
7.772  
7.627  
7.614  
7.512  
7.367  
7.472  
7.462  
7.454  
7.443  
7.375  
7.371  
7.315  
7.302  
7.290  
7.177  
7.164

5.161

3.326  
1.271

CHCl<sub>3</sub>

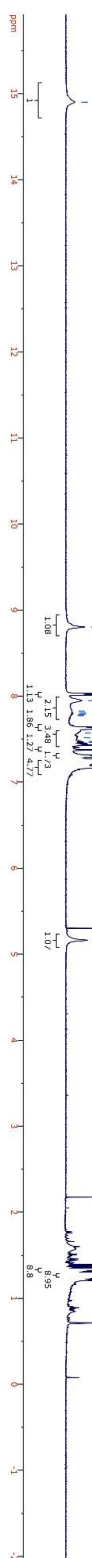

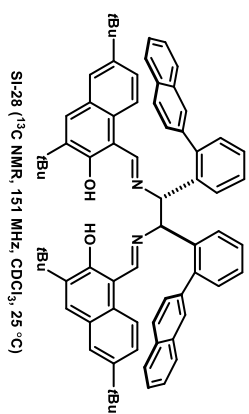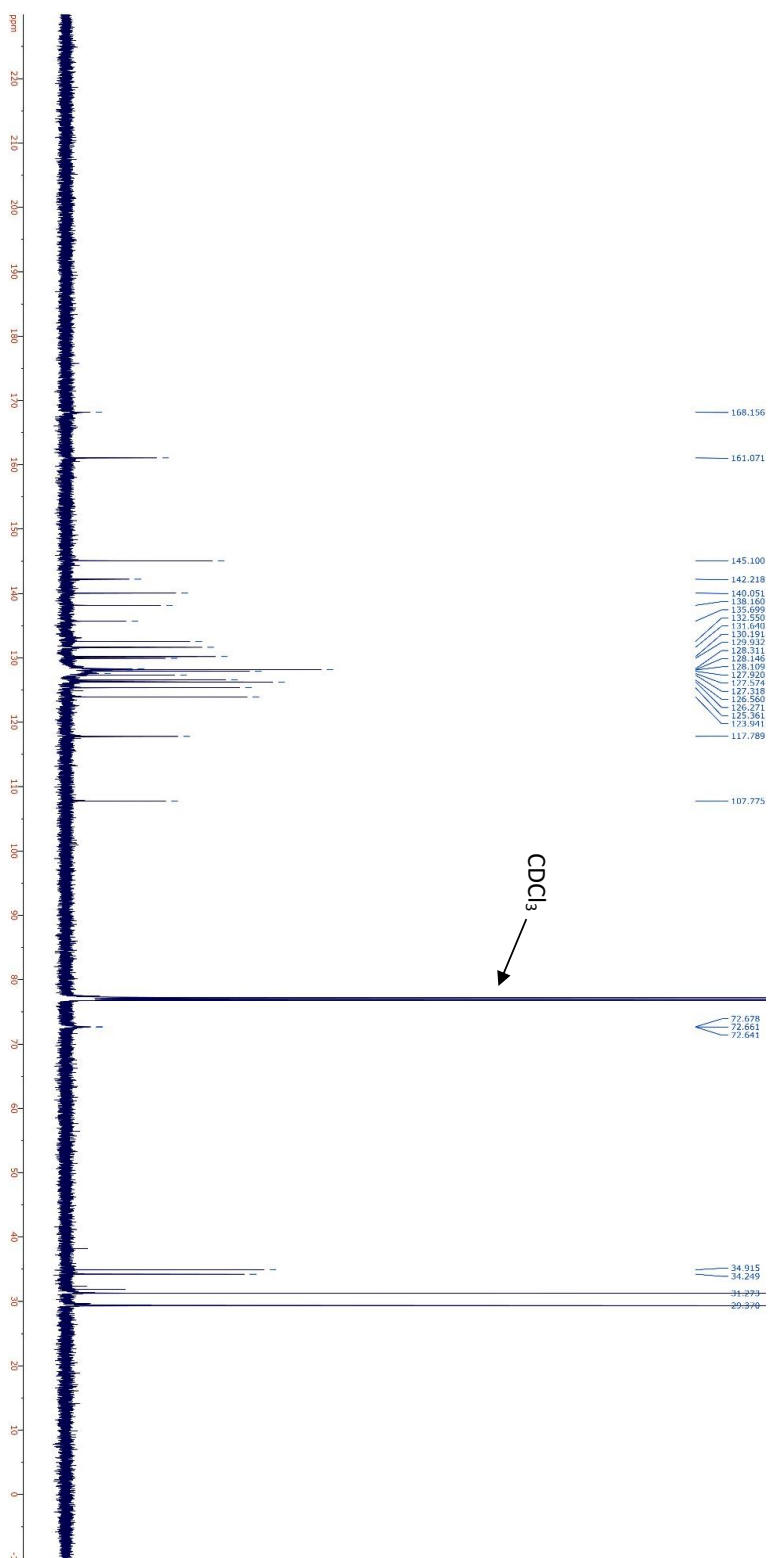

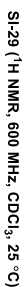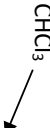

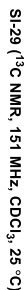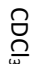

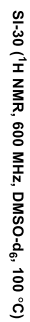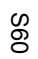



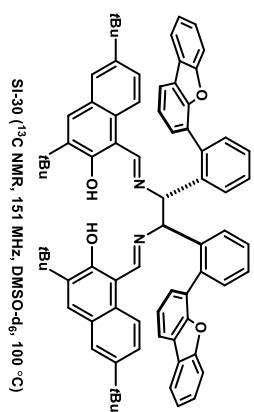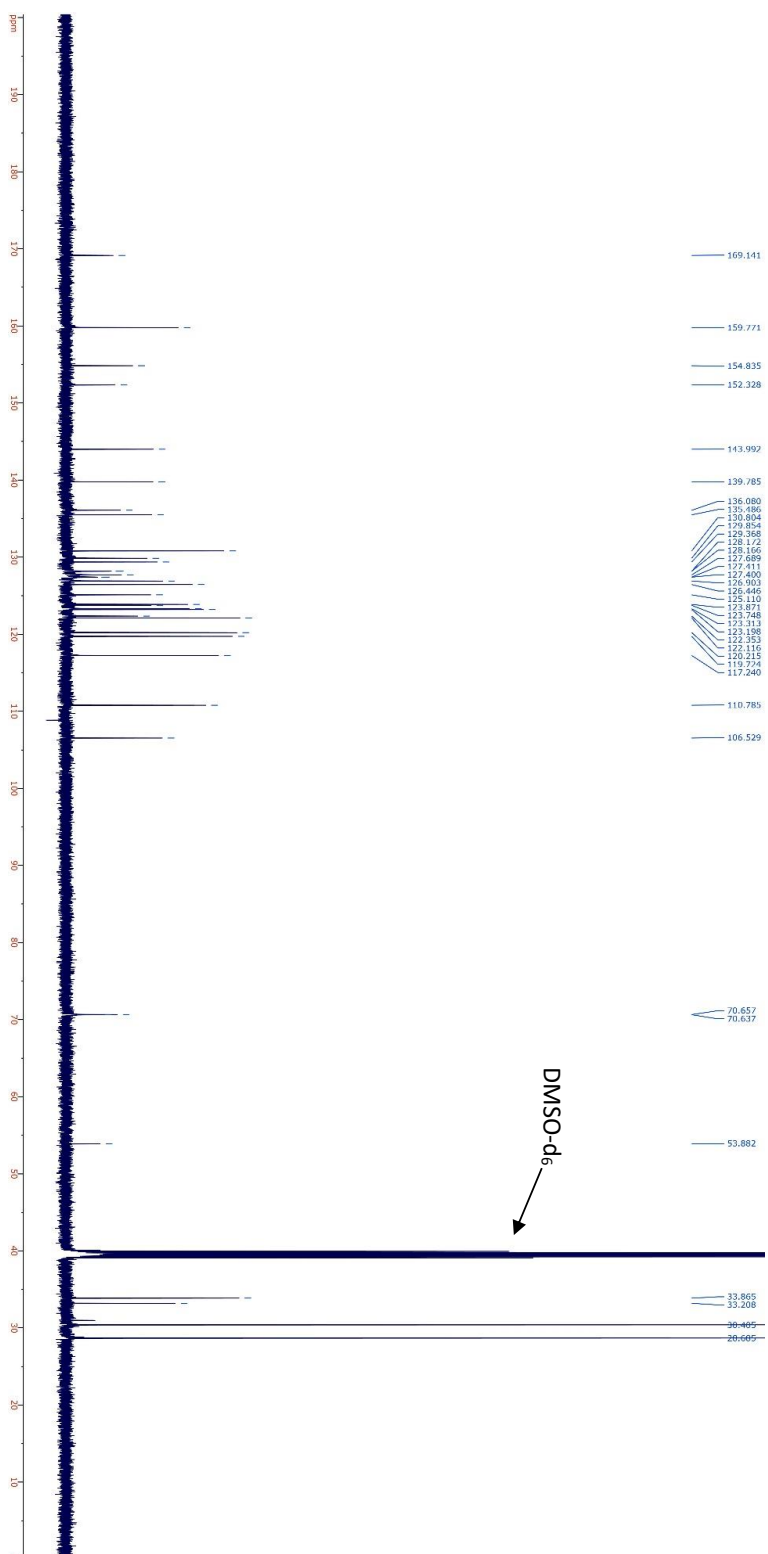

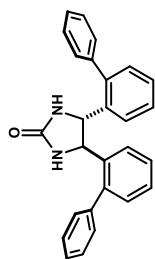

SI-33 ( $^1\text{H}$  NMR, 600 MHz,  $\text{CDCl}_3$ , 25  $^\circ\text{C}$ )

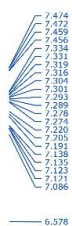

6.578

4.883

4.641

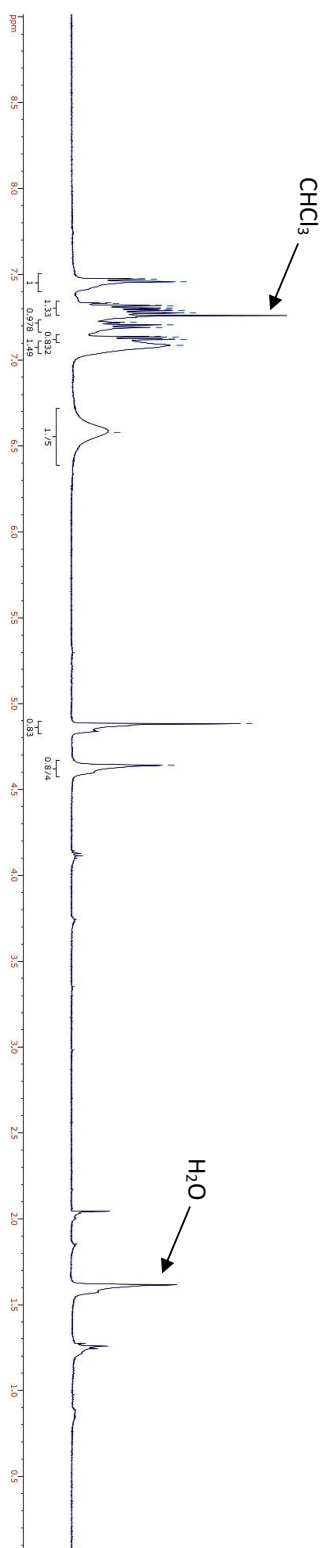

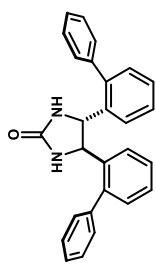

SI-33 ( $^{13}\text{C}$  NMR, 151 MHz,  $\text{CDCl}_3$ , 25 °C)

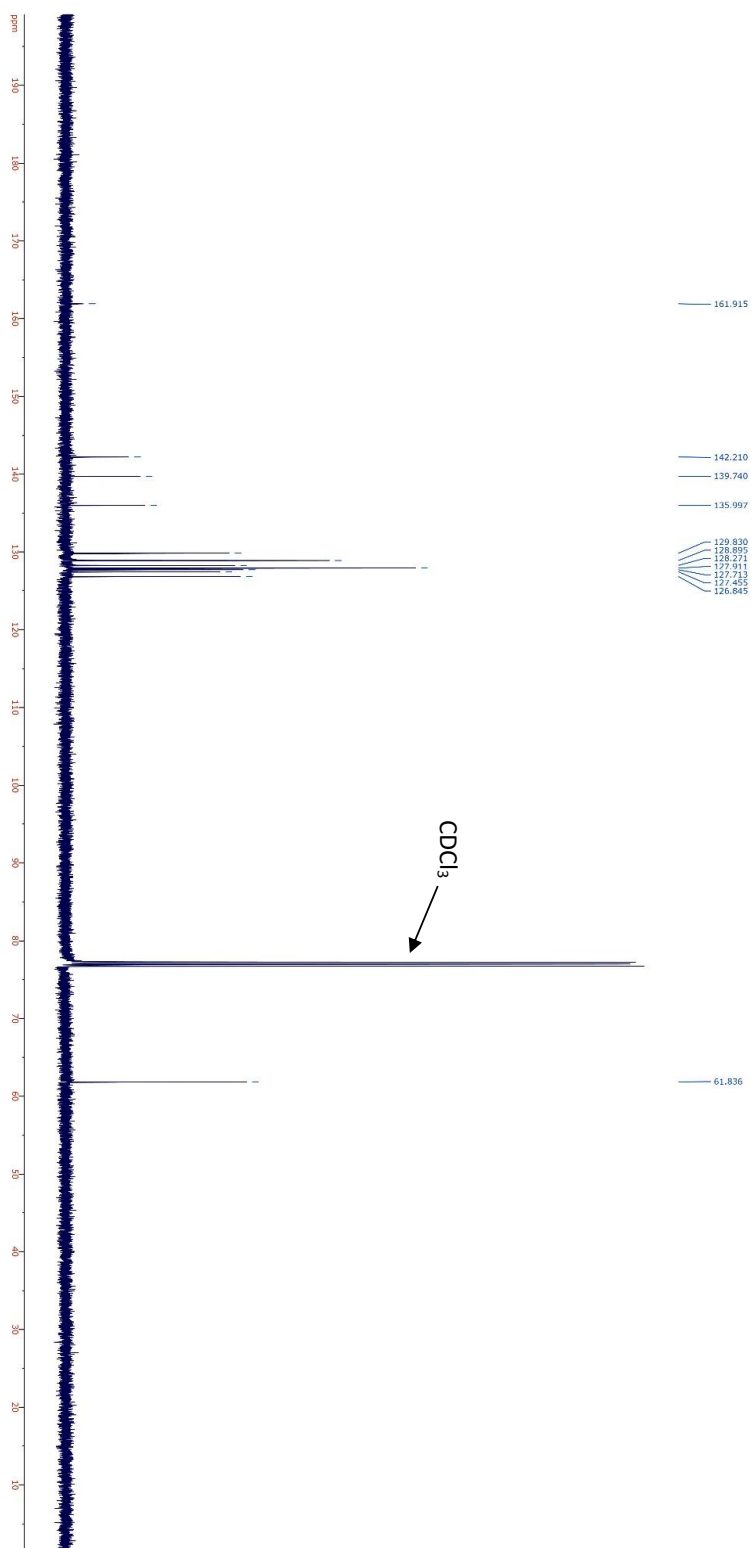

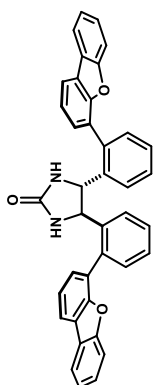

SI-34 (<sup>1</sup>H NMR, 600 MHz, DMSO-d<sub>6</sub>, 100 °C)

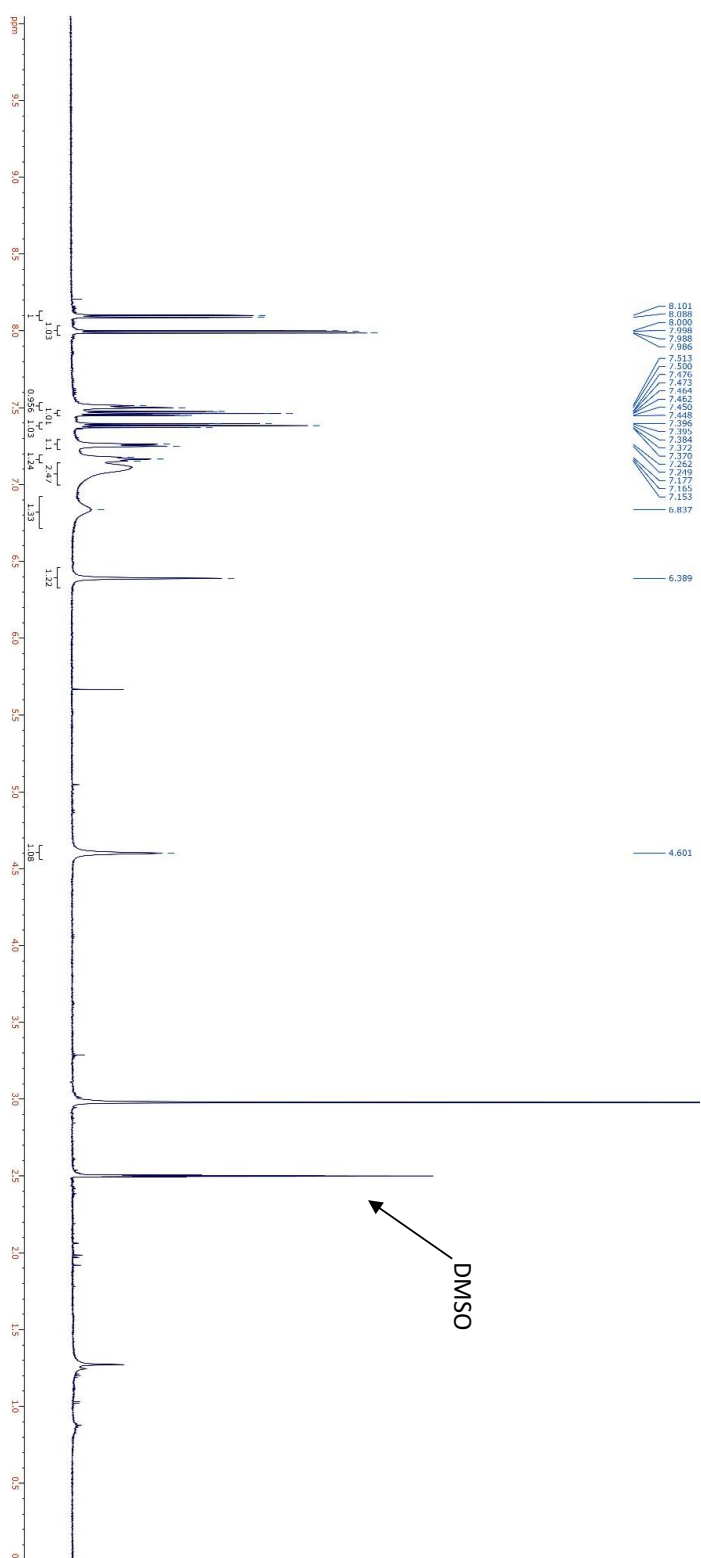

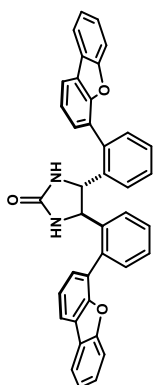

SI-34 ( $^{13}\text{C}$  NMR, 151 MHz,  $\text{DMSO-d}_6$ , 100 °C)

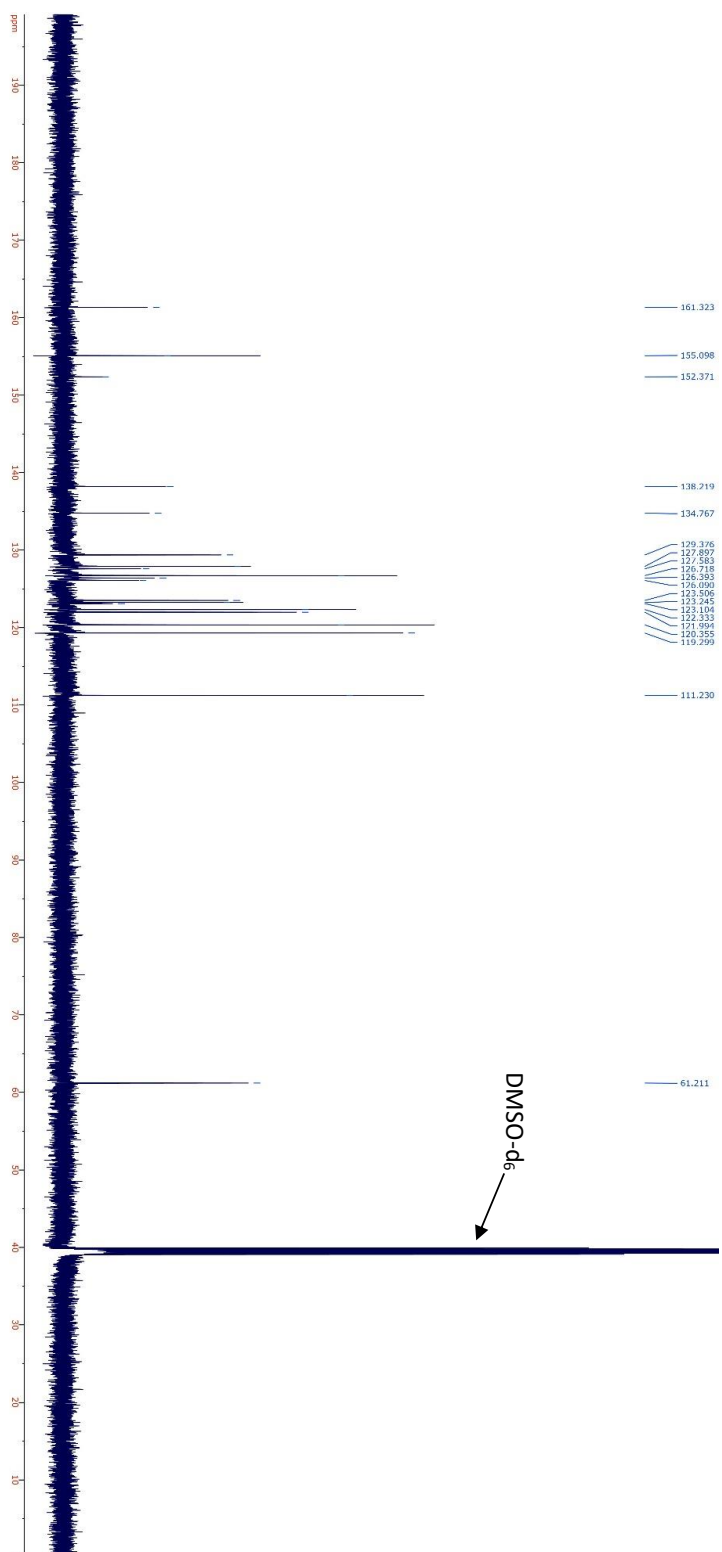

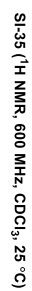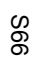

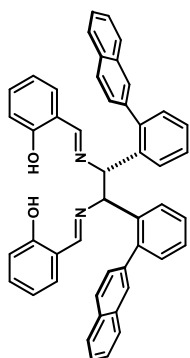

SI-35 ( $^{13}\text{C}$  NMR, 151 MHz,  $\text{CDCl}_3$ , 25  $^\circ\text{C}$ )

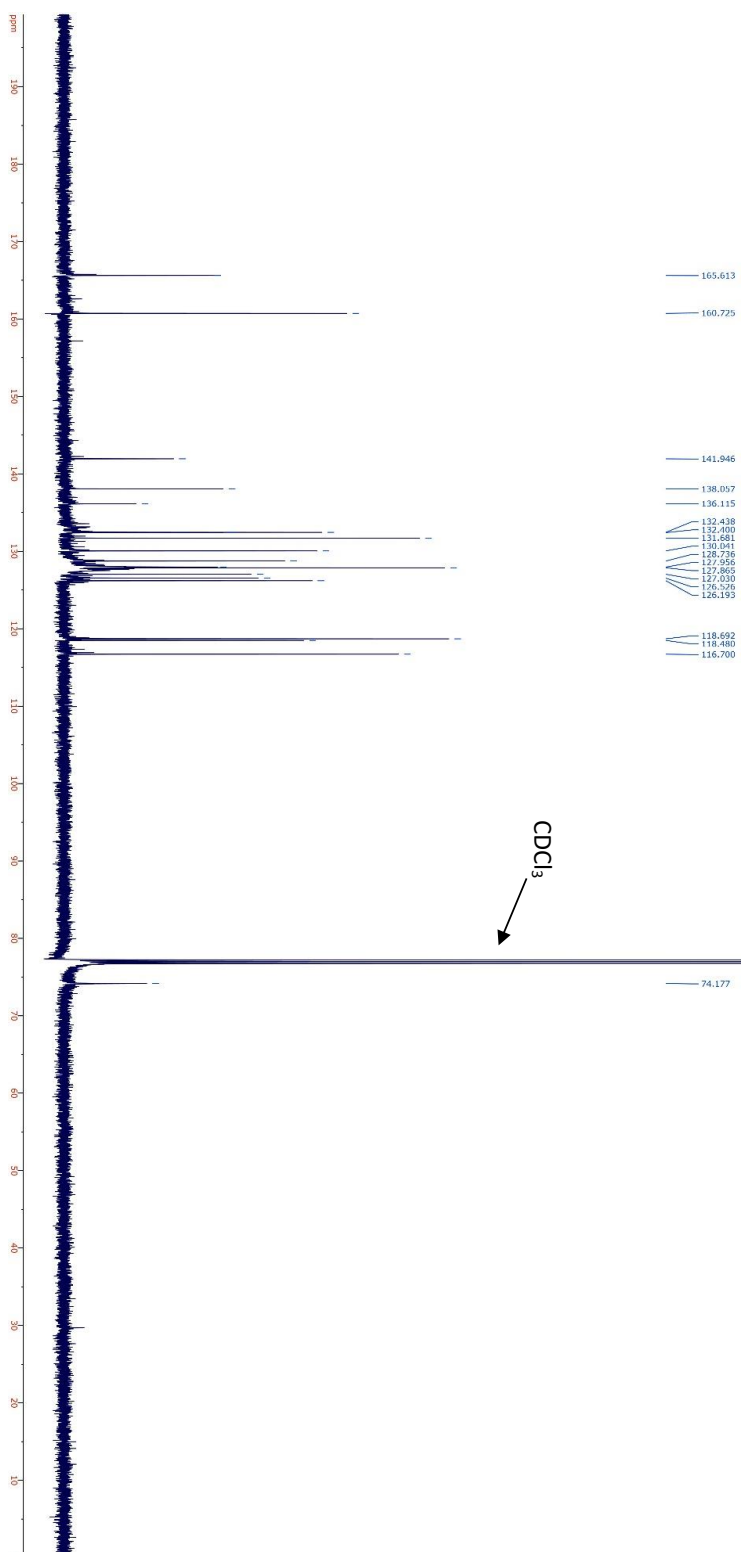

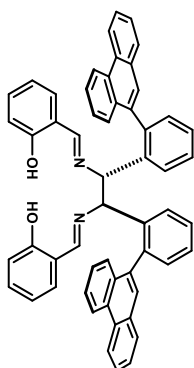

SI-36 ( $^1\text{H}$  NMR, 600 MHz,  $\text{CDCl}_3$ , 25  $^\circ\text{C}$ )

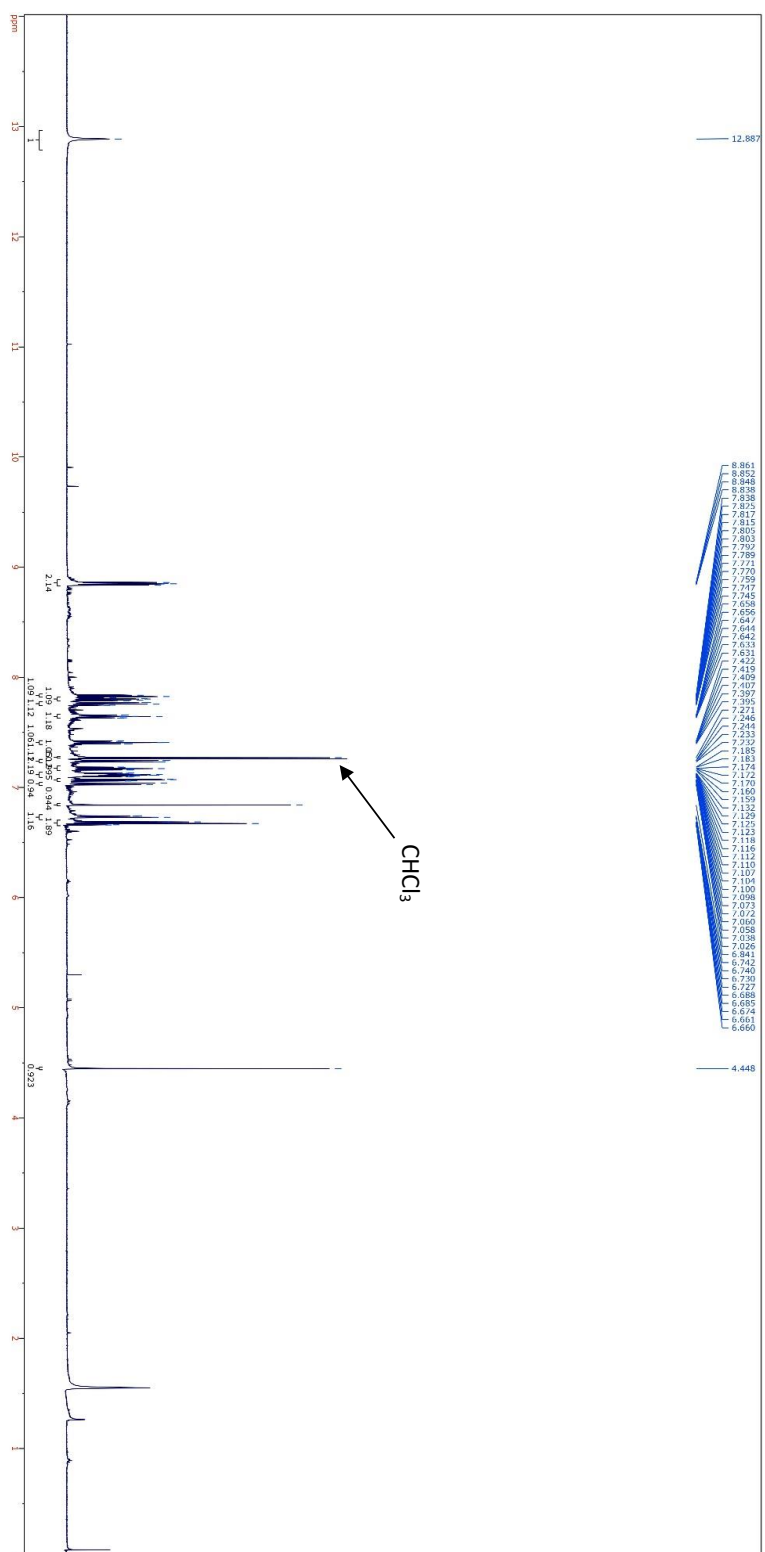



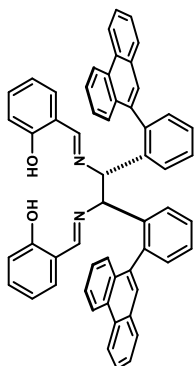

SI-36 ( $^{13}\text{C}$  NMR, 151 MHz,  $\text{CDCl}_3$ , 25  $^\circ\text{C}$ )

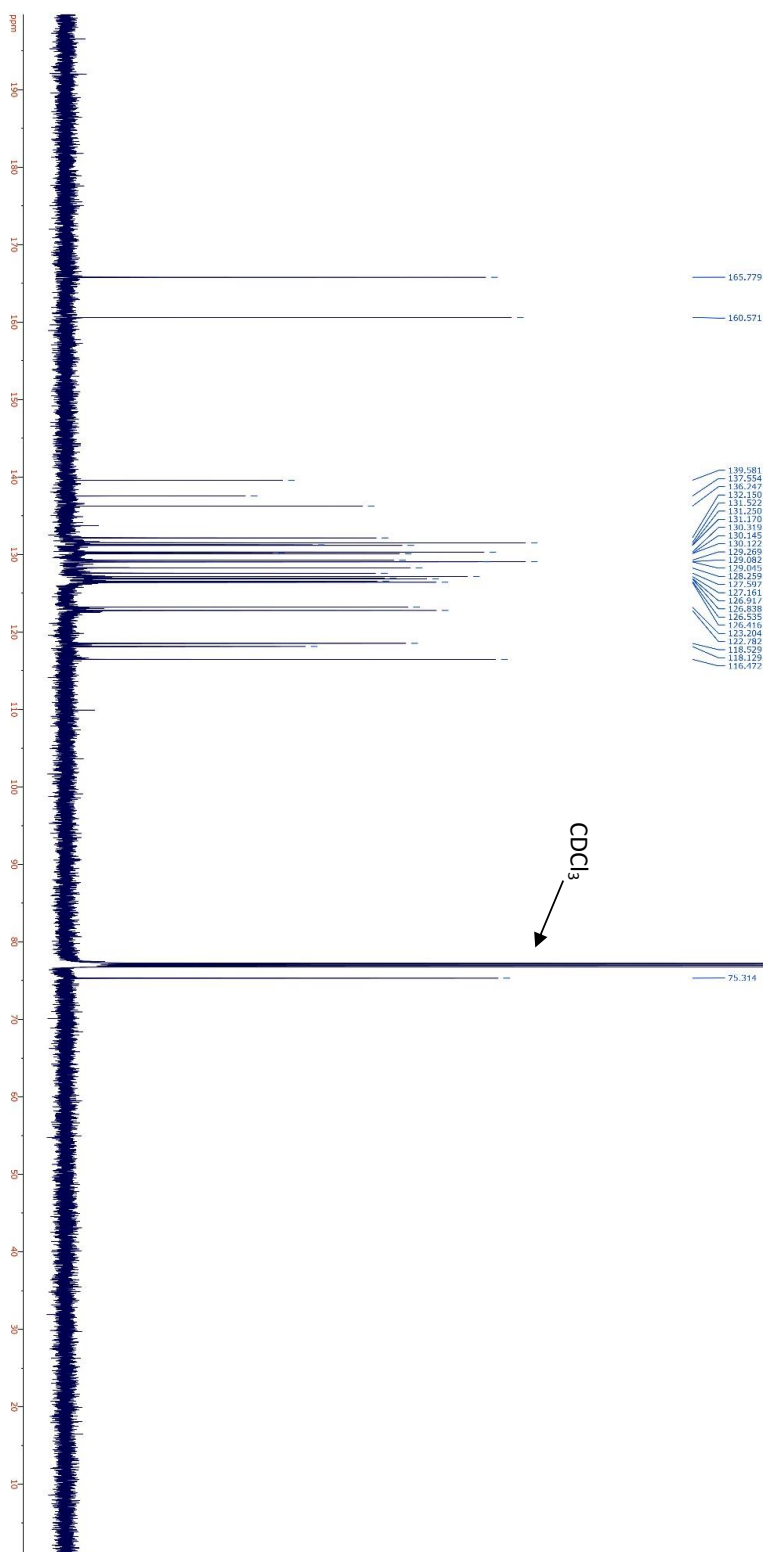

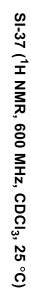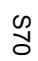

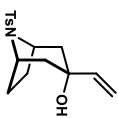

SI-37 ( $^{13}\text{C}$  NMR, 151 MHz,  $\text{CDCl}_3$ , 25 °C)

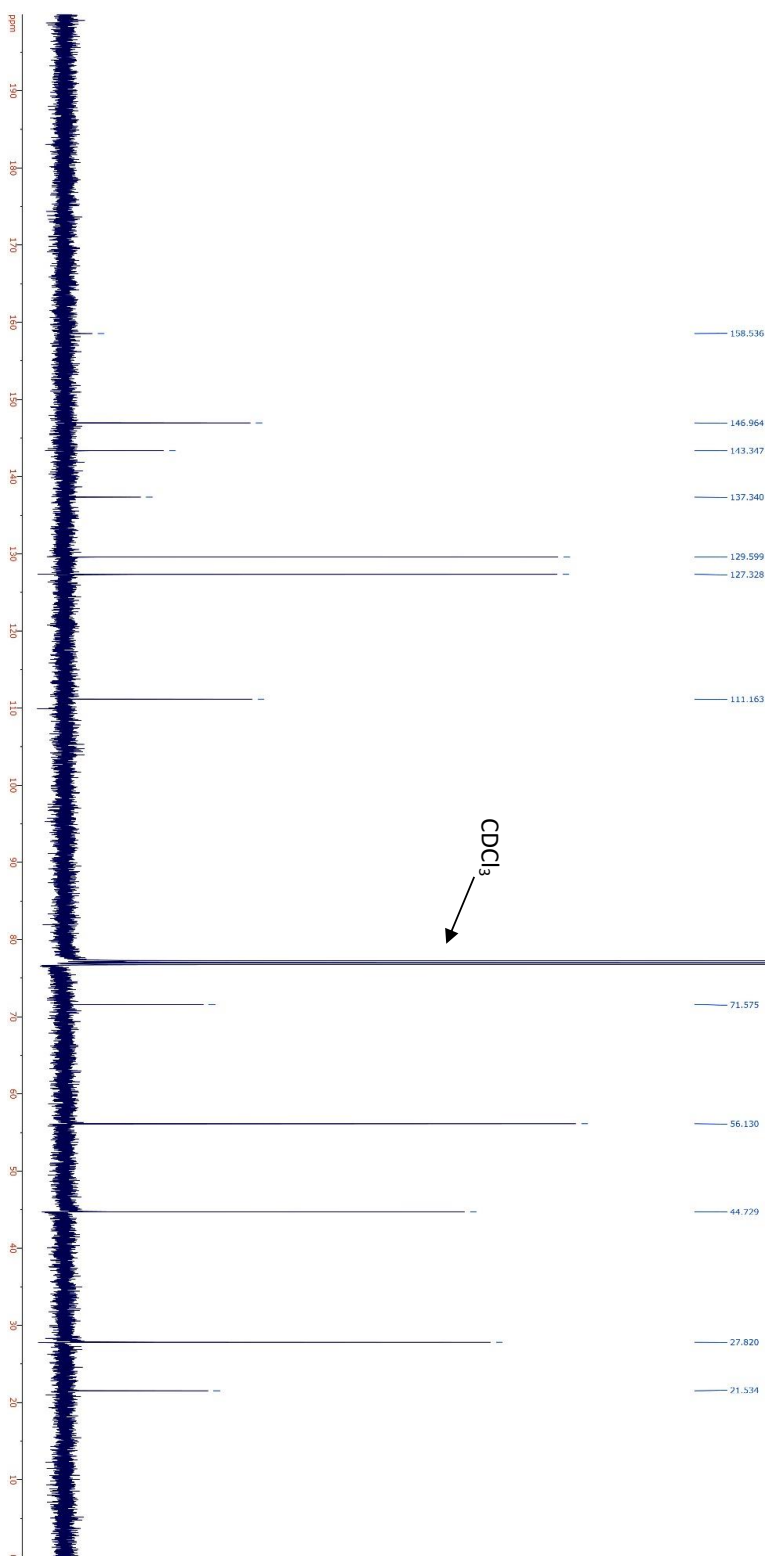

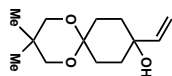

SI-38 ( $^1\text{H}$  NMR, 500 MHz,  $\text{CDCl}_3$ , 25  $^\circ\text{C}$ )

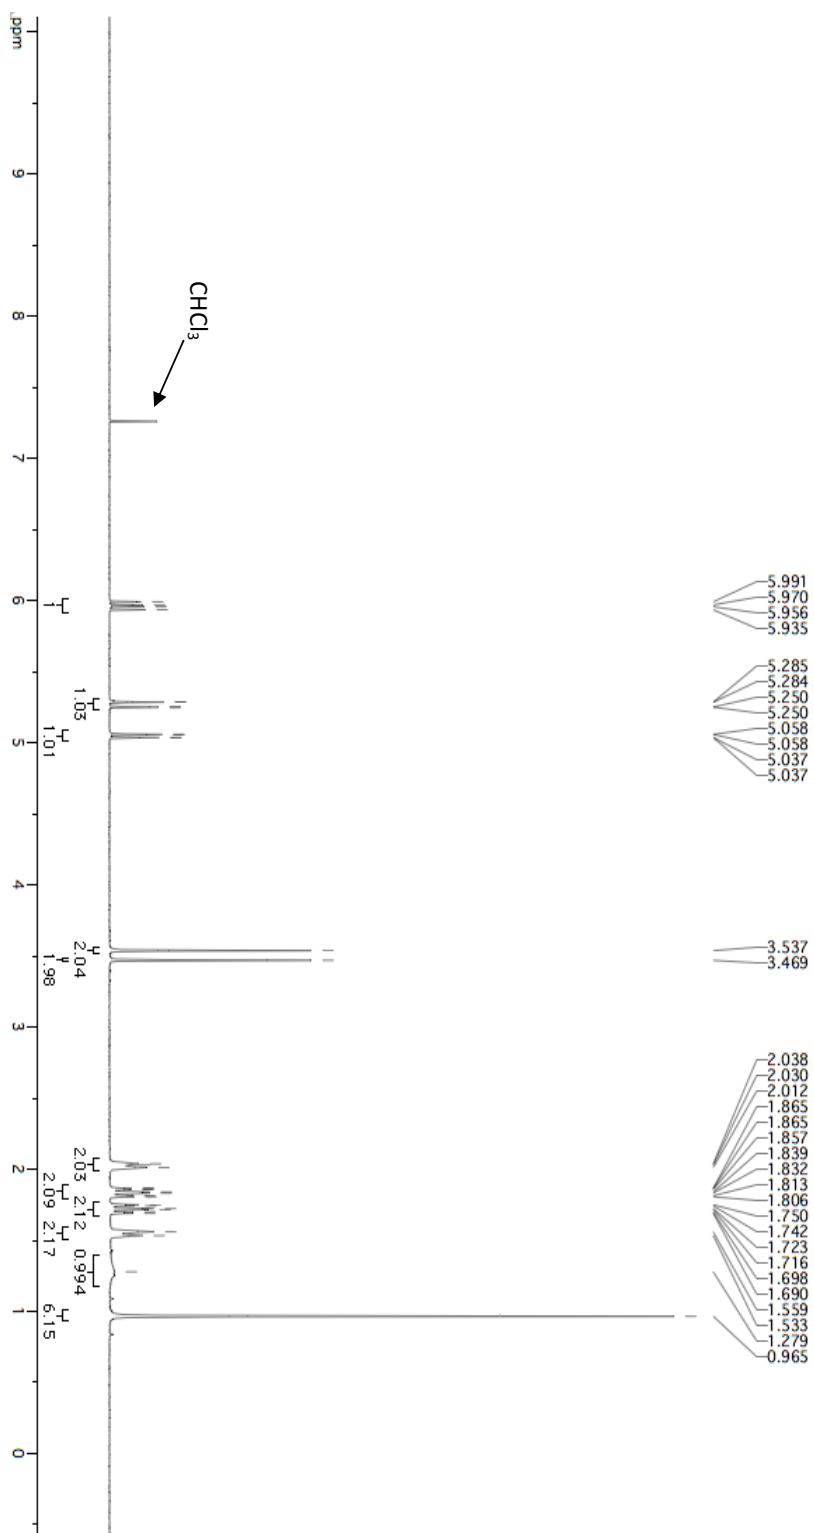

S72

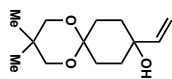

SI-38 (<sup>13</sup>C NMR, 126 MHz, CDCl<sub>3</sub>, 25 °C)

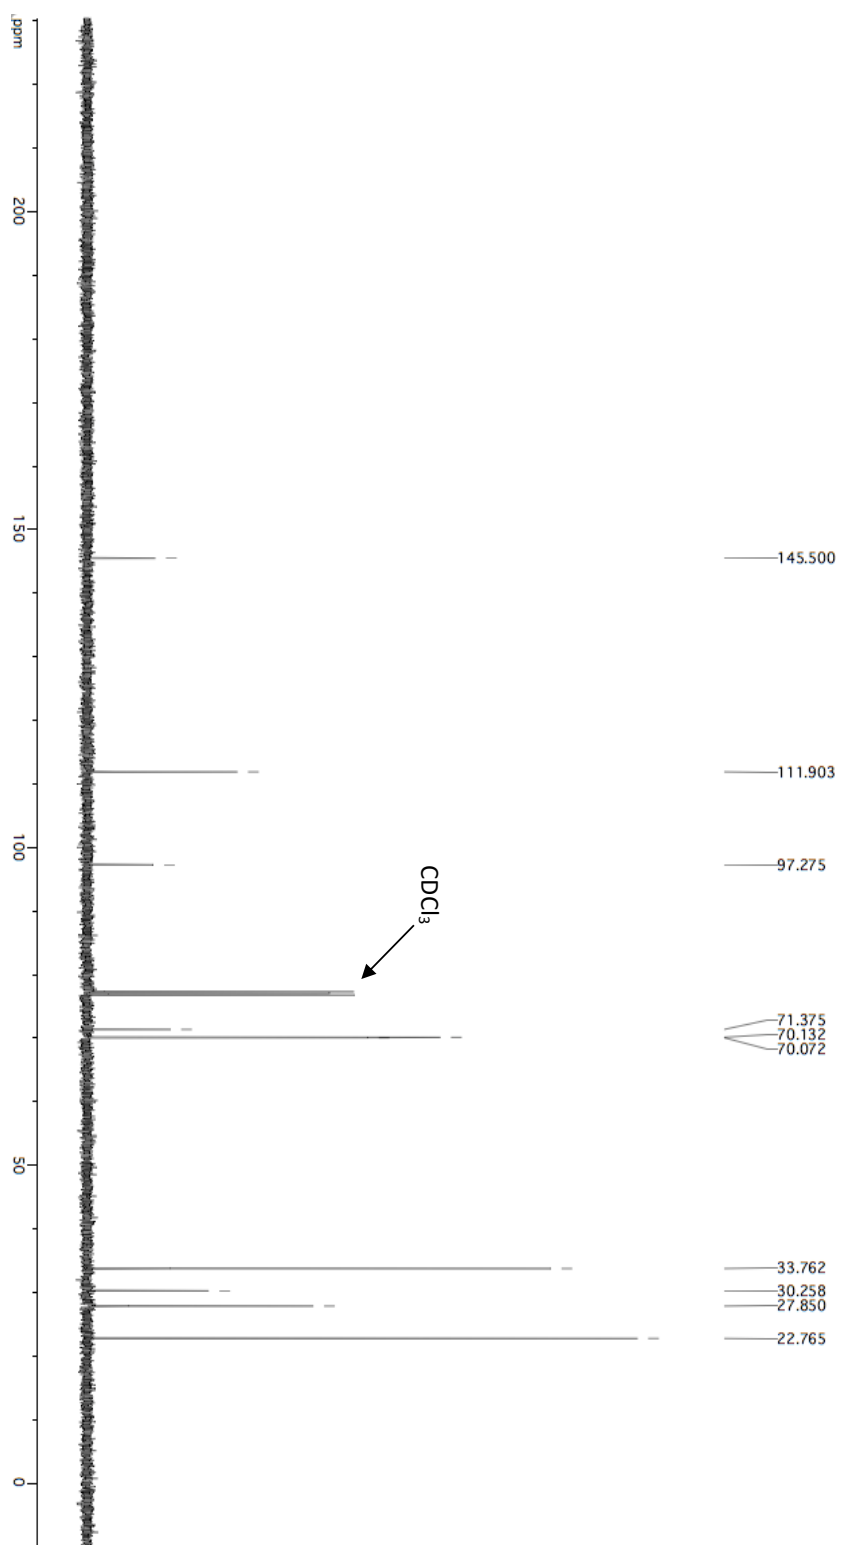

S73

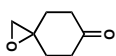

SI-46 ( $^1\text{H}$  NMR, 500 MHz,  $\text{CDCl}_3$ , 25  $^\circ\text{C}$ )

2.798  
2.671  
2.659  
2.648  
2.639  
2.630  
2.619  
2.607  
2.436  
2.427  
2.416  
2.409  
2.398  
2.389  
2.161  
2.150  
2.133  
2.129  
2.124  
2.111  
2.100  
1.770  
1.760  
1.747  
1.733  
1.724

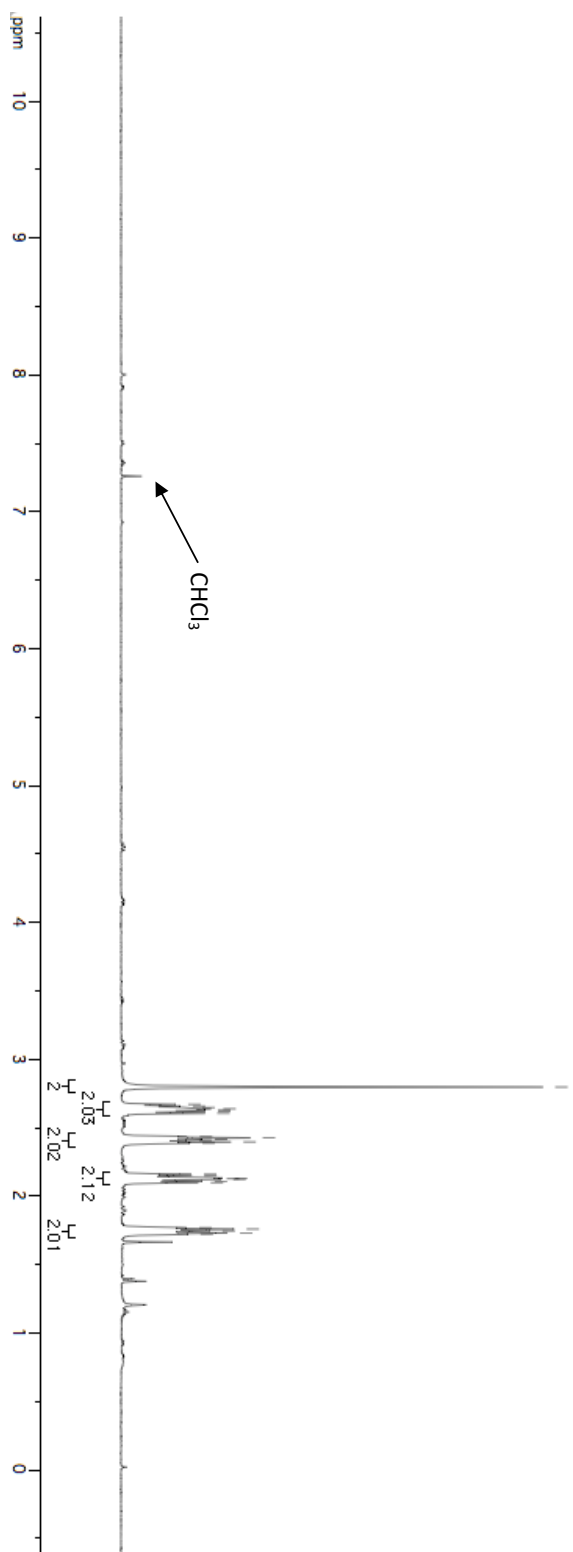

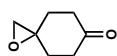

SI-46 ( $^{13}\text{C}$  NMR, 126 MHz,  $\text{CDCl}_3$ , 25  $^\circ\text{C}$ )

209.868

56.892  
54.135

38.866  
32.301

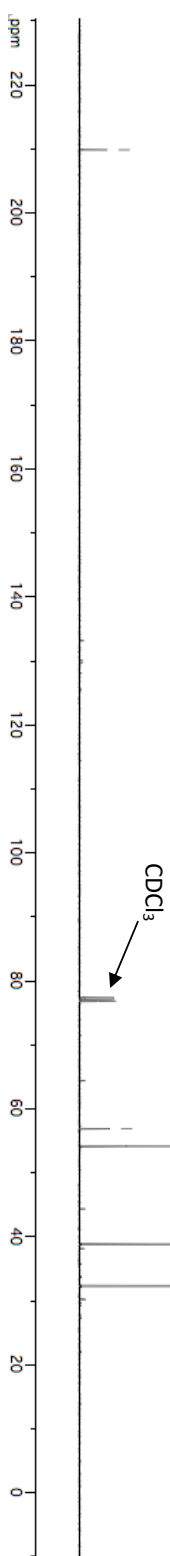

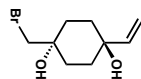

SI-39 ( $^1\text{H}$  NMR, 500 MHz,  $\text{CDCl}_3$ , 25  $^\circ\text{C}$ )

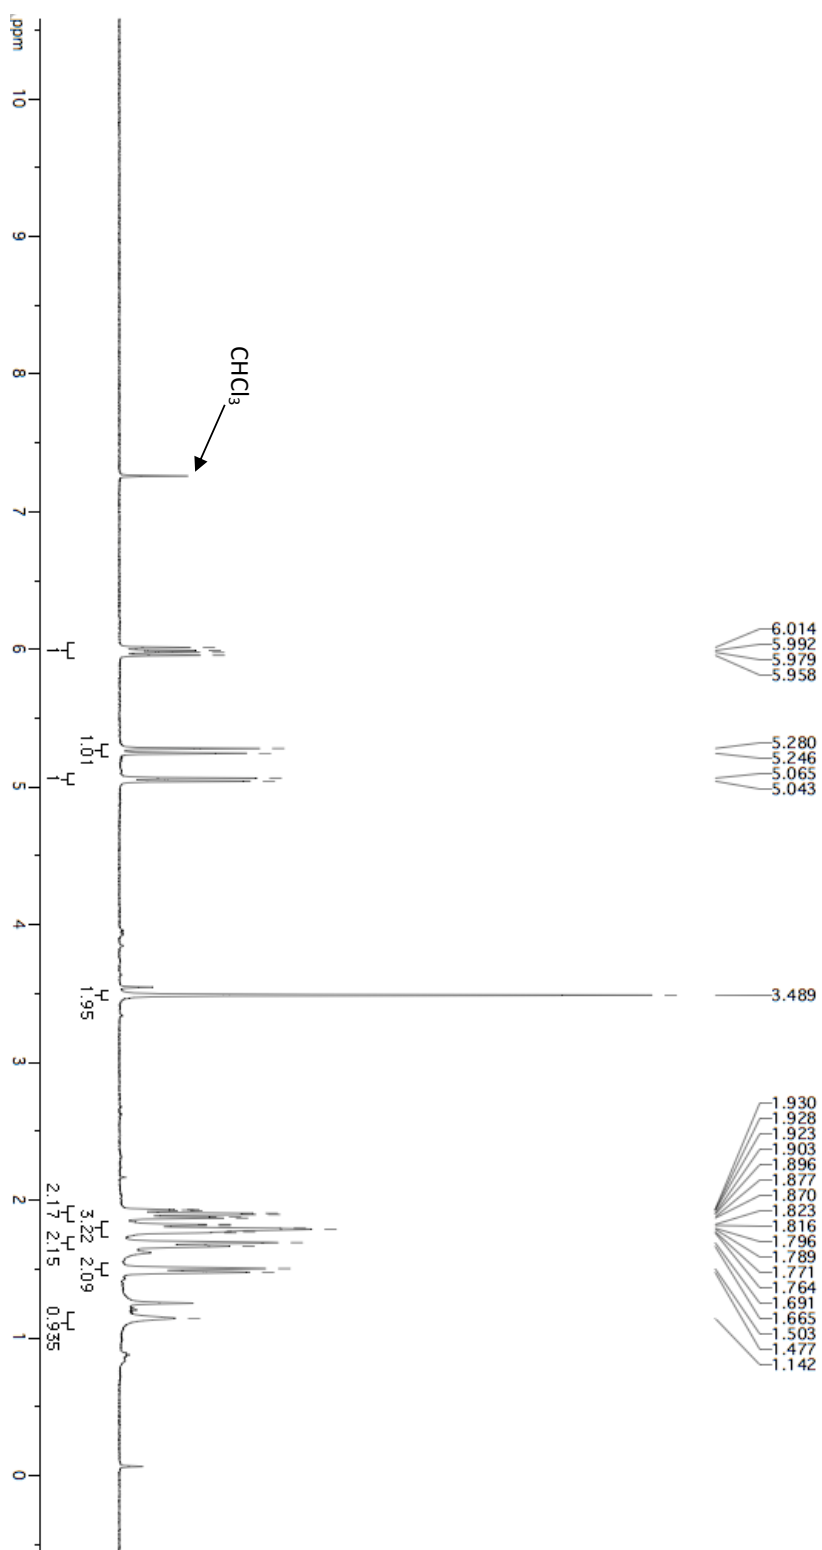



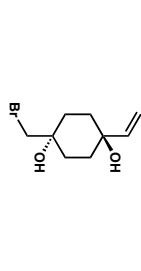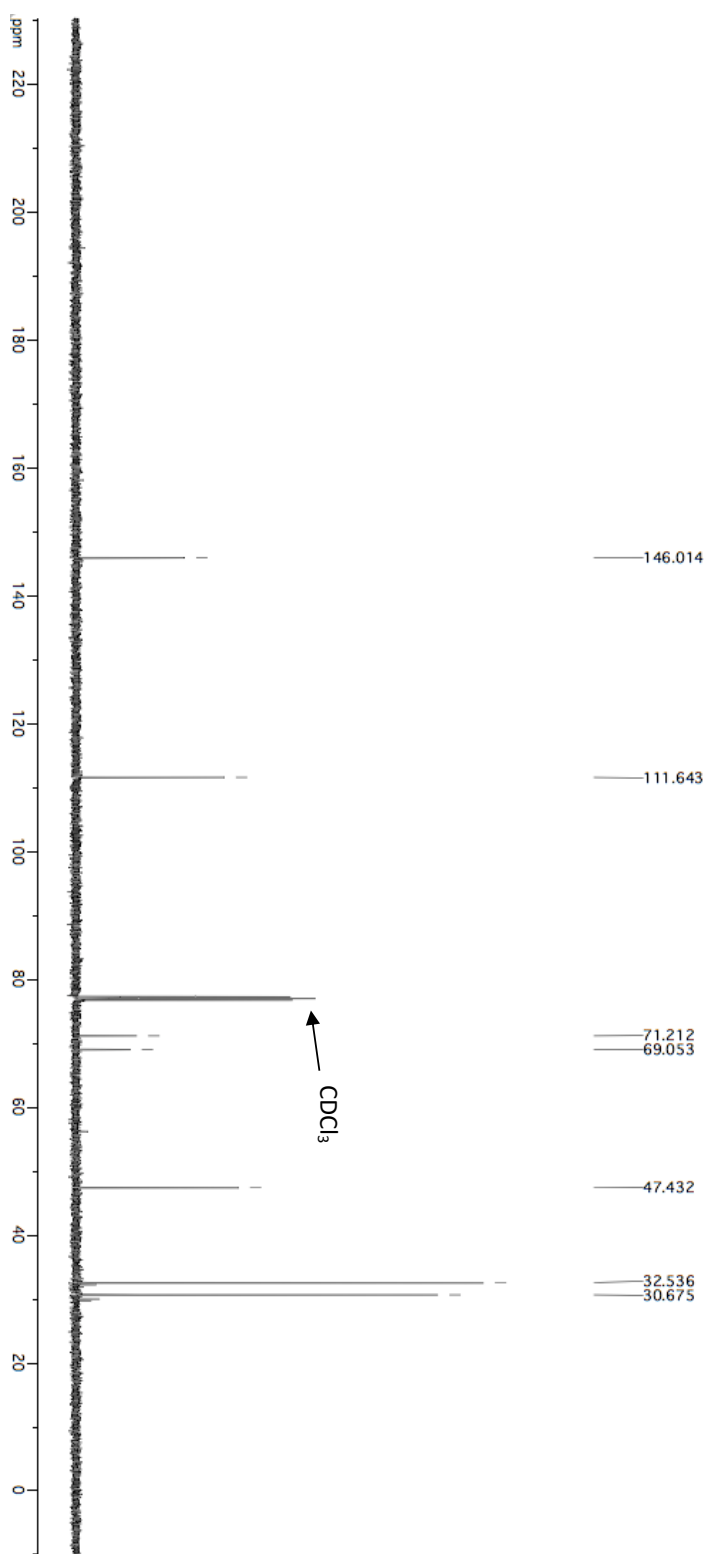

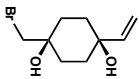

SI-40 ( $^1\text{H}$  NMR, 500 MHz,  $\text{CDCl}_3$ , 25  $^\circ\text{C}$ )

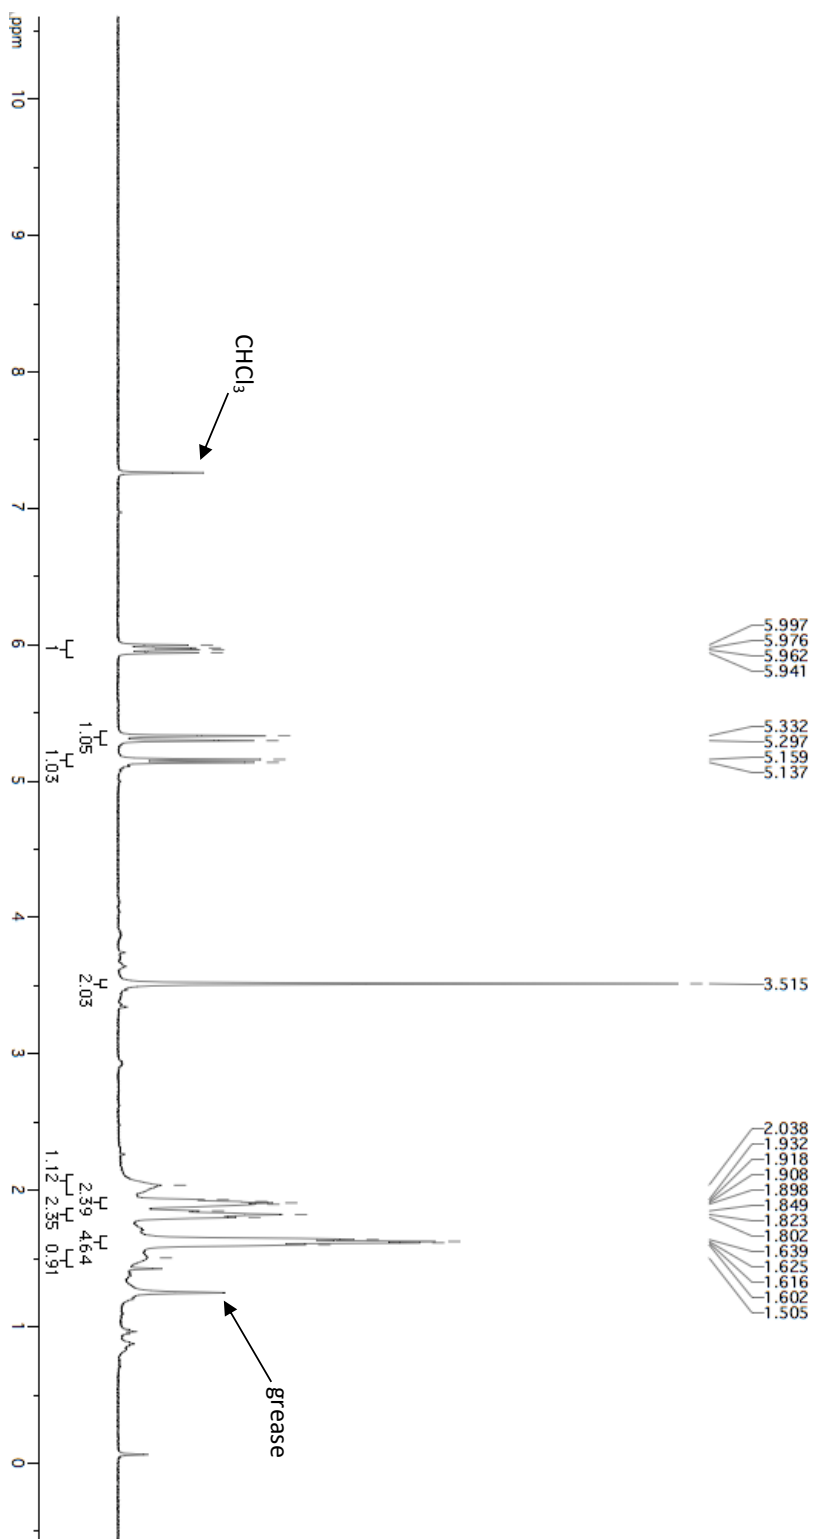

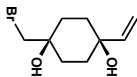

SI-40 ( $^{13}\text{C}$  NMR, 126 MHz,  $\text{CDCl}_3$ , 25  $^\circ\text{C}$ )

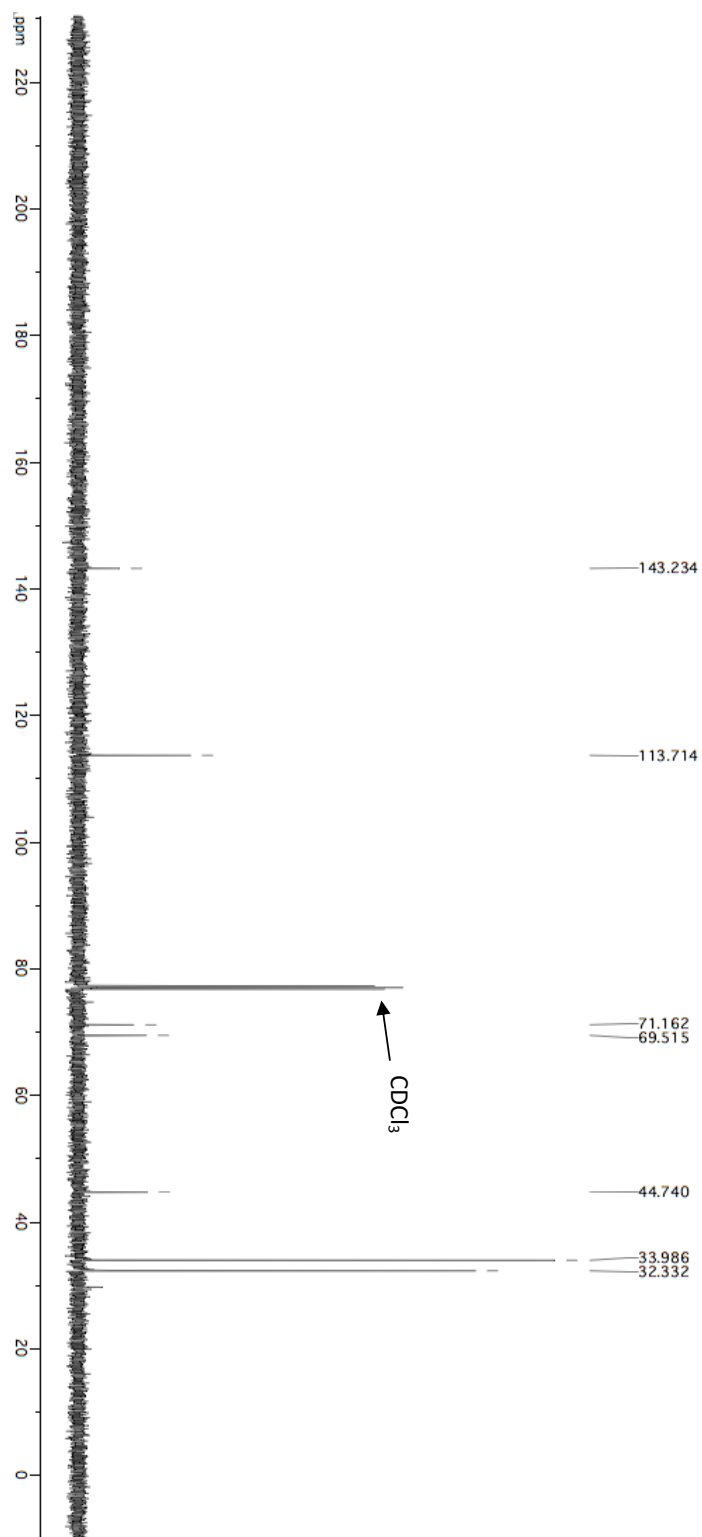

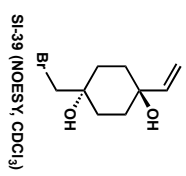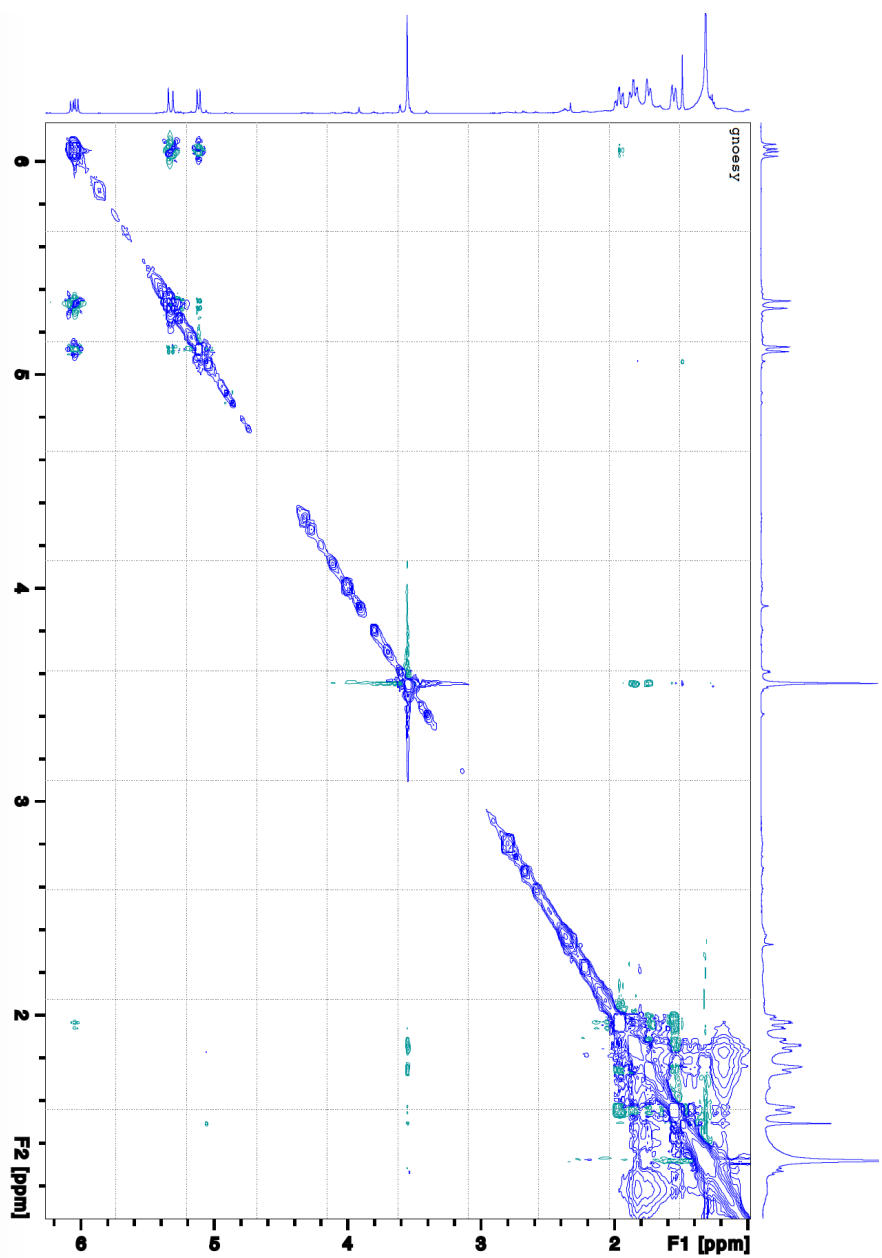

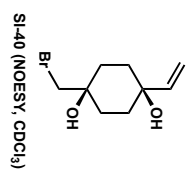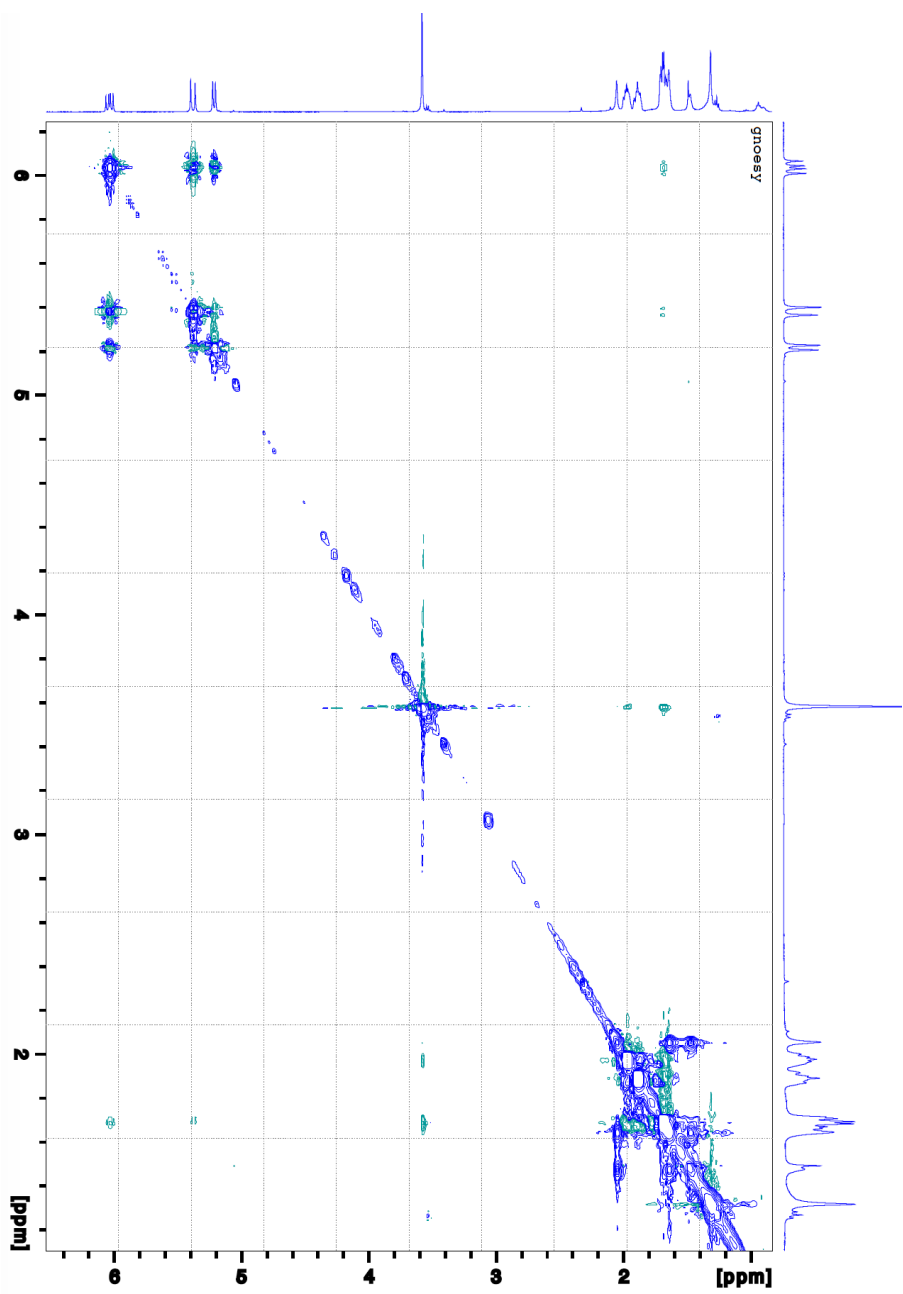

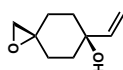

SI-41 ( $^1\text{H}$  NMR, 500 MHz,  $\text{CDCl}_3$ , 25  $^\circ\text{C}$ )

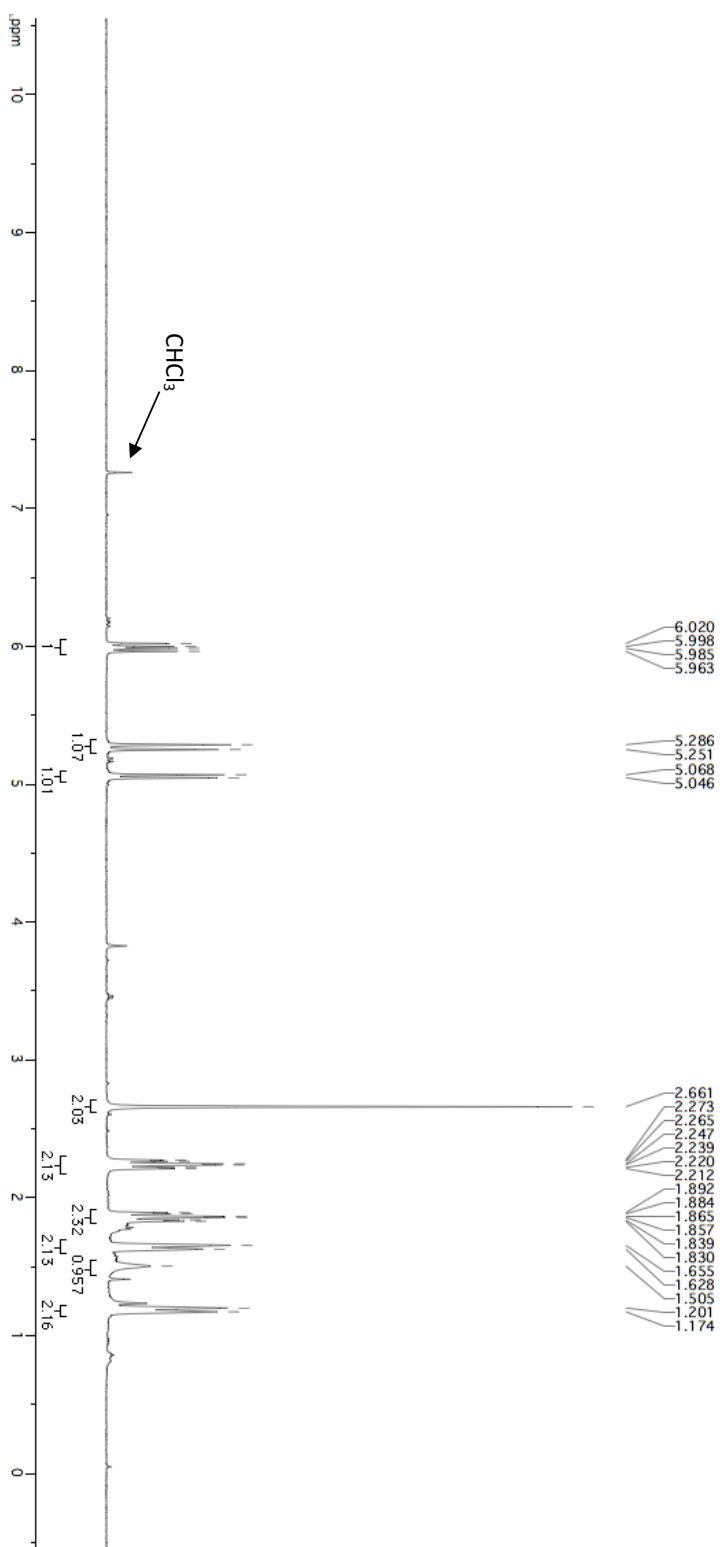

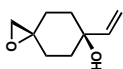

SI-41 ( $^{13}\text{C}$  NMR, 126 MHz,  $\text{CDCl}_3$ , 25  $^\circ\text{C}$ )

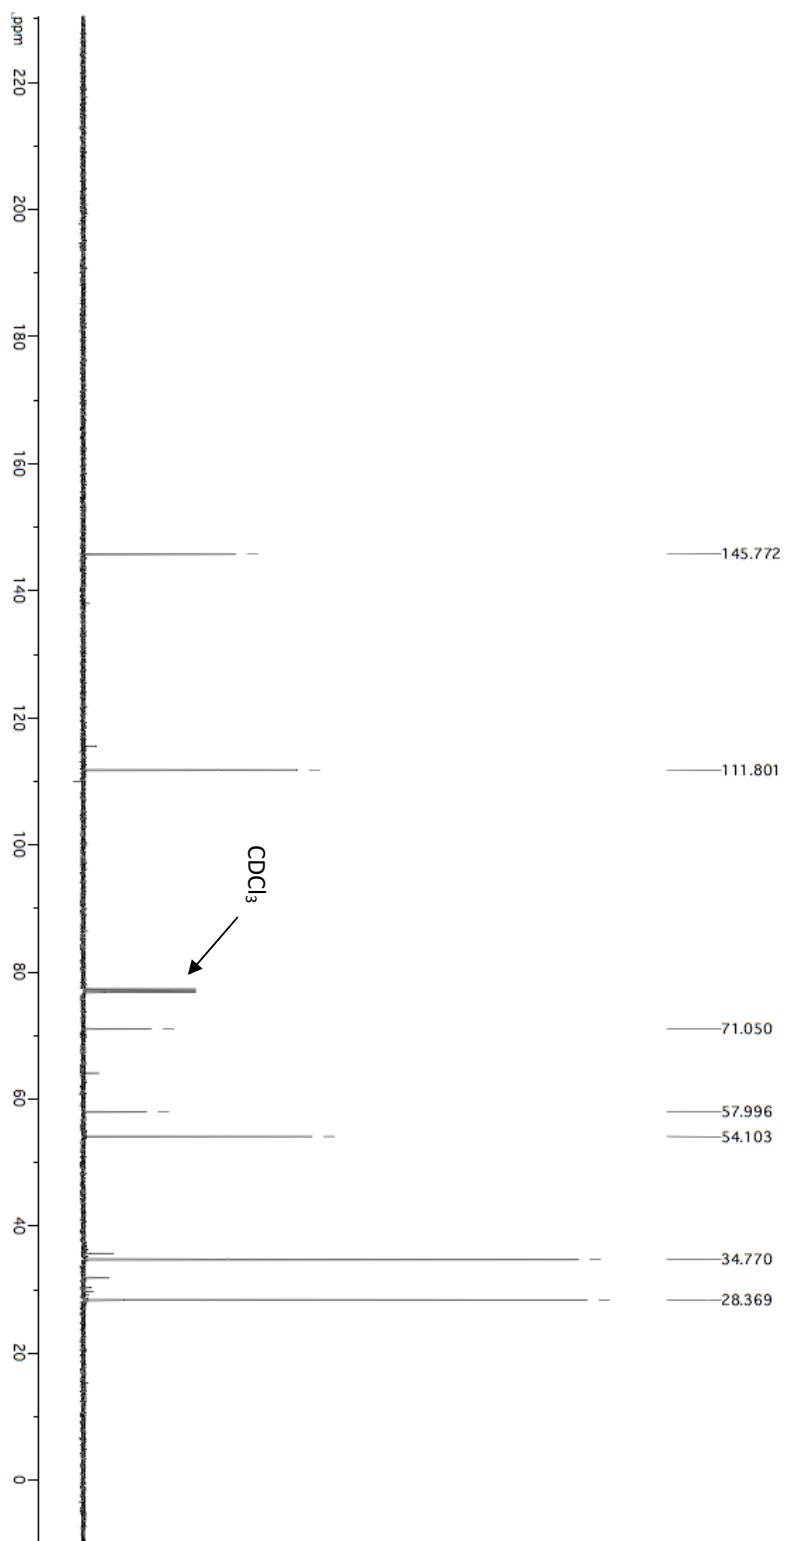

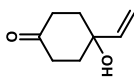

SI-42 ( $^1\text{H}$  NMR, 600 MHz,  $\text{CDCl}_3$ , 25 °C)

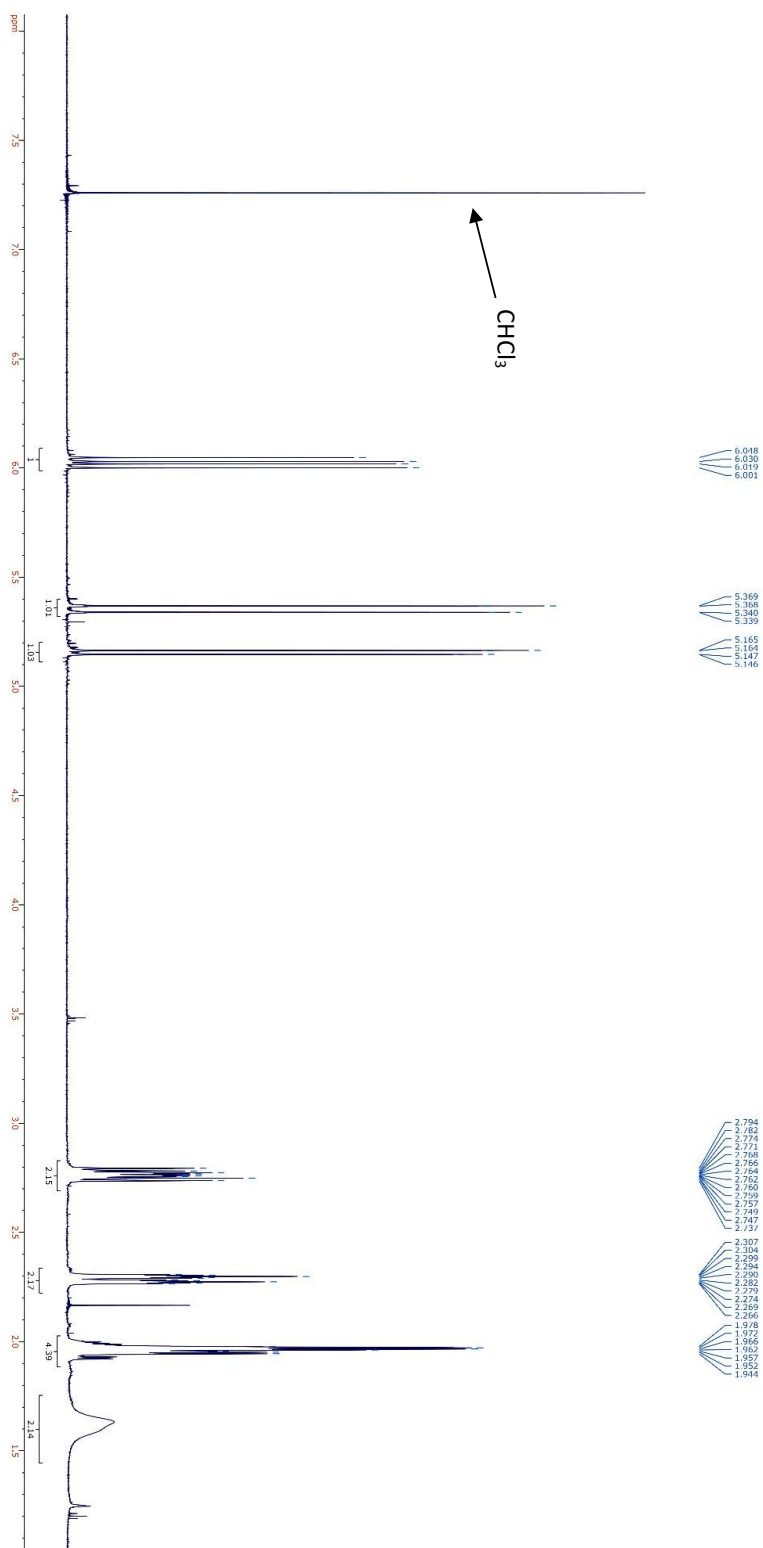



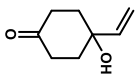

SI-42 ( $^{13}\text{C}$  NMR, 151 MHz,  $\text{CDCl}_3$ , 25  $^\circ\text{C}$ )

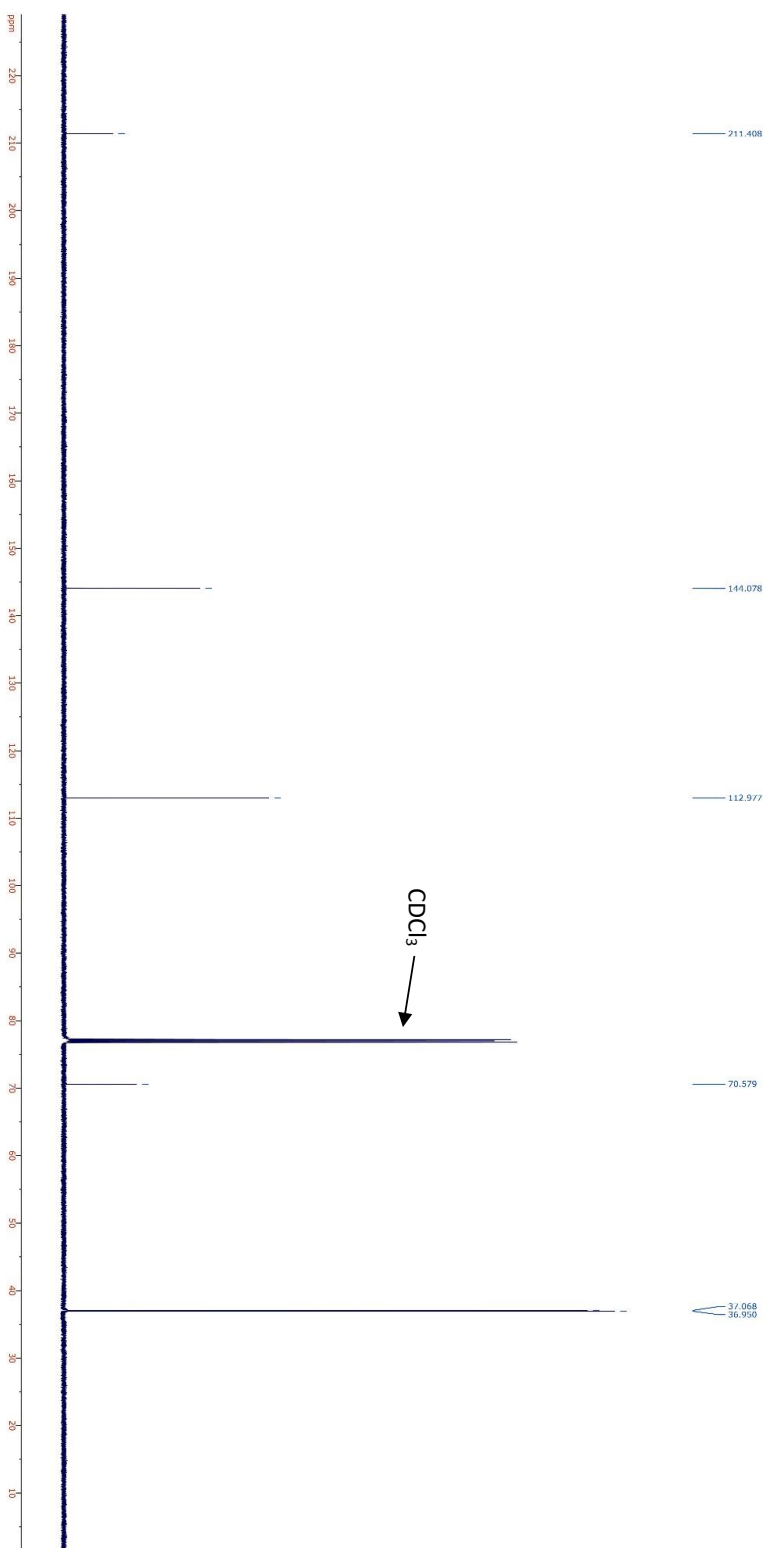

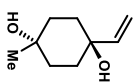

SI-43 ( $^1\text{H}$  NMR, 600 MHz,  $\text{CDCl}_3$ , 25  $^\circ\text{C}$ )

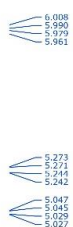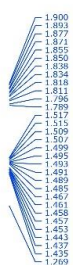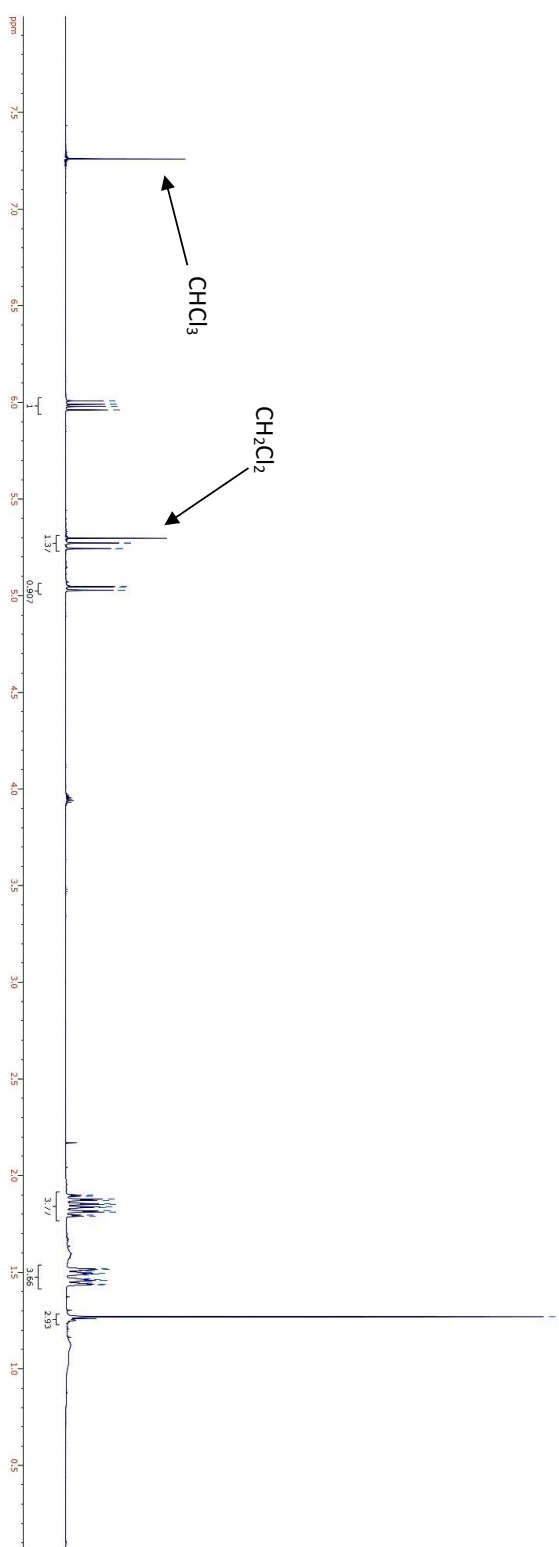

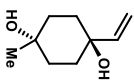

SI-43 (NOESY, CDCl<sub>3</sub>, 25 °C)

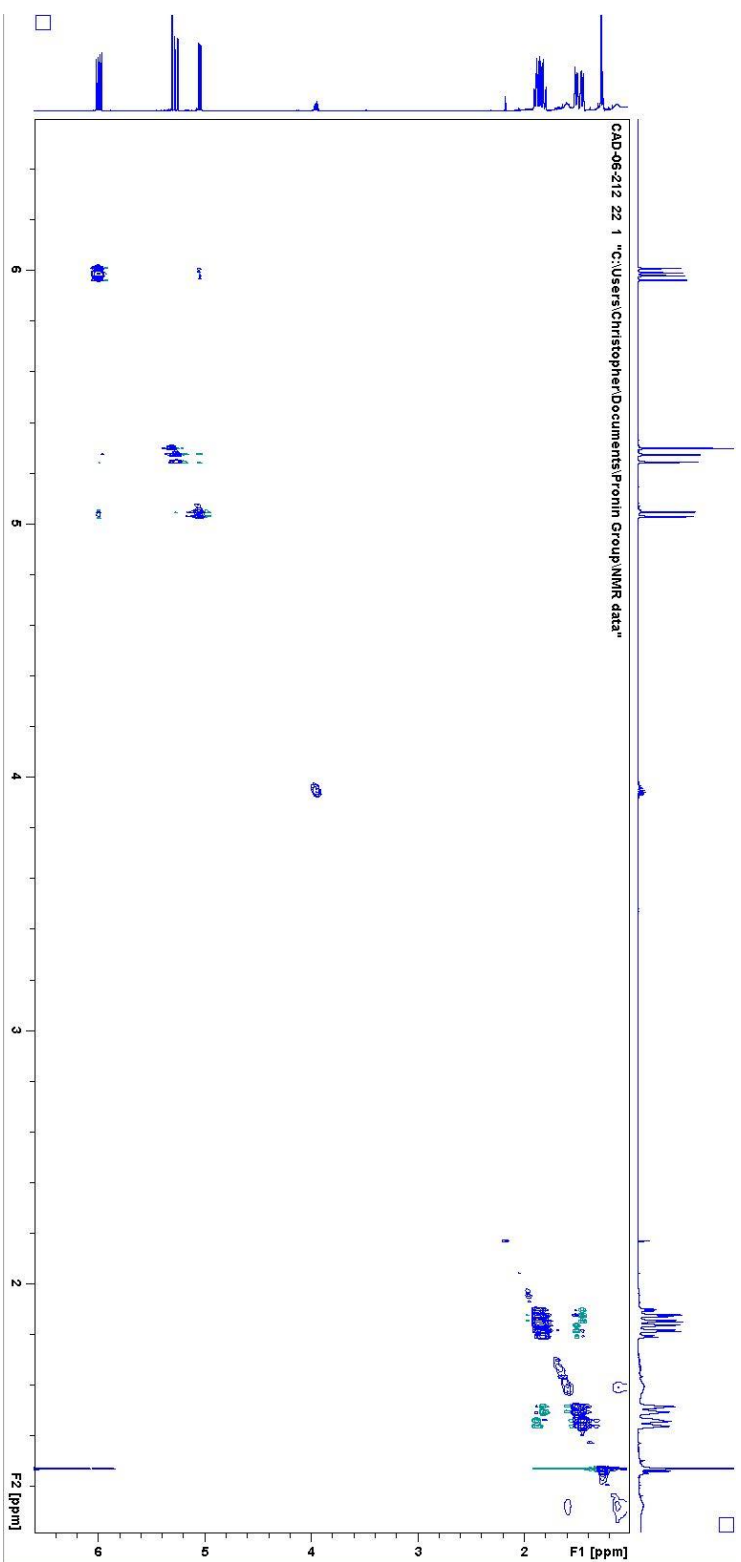

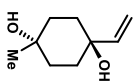

SI-43 ( $^{13}\text{C}$  NMR, 151 MHz,  $\text{CDCl}_3$ , 25 °C)

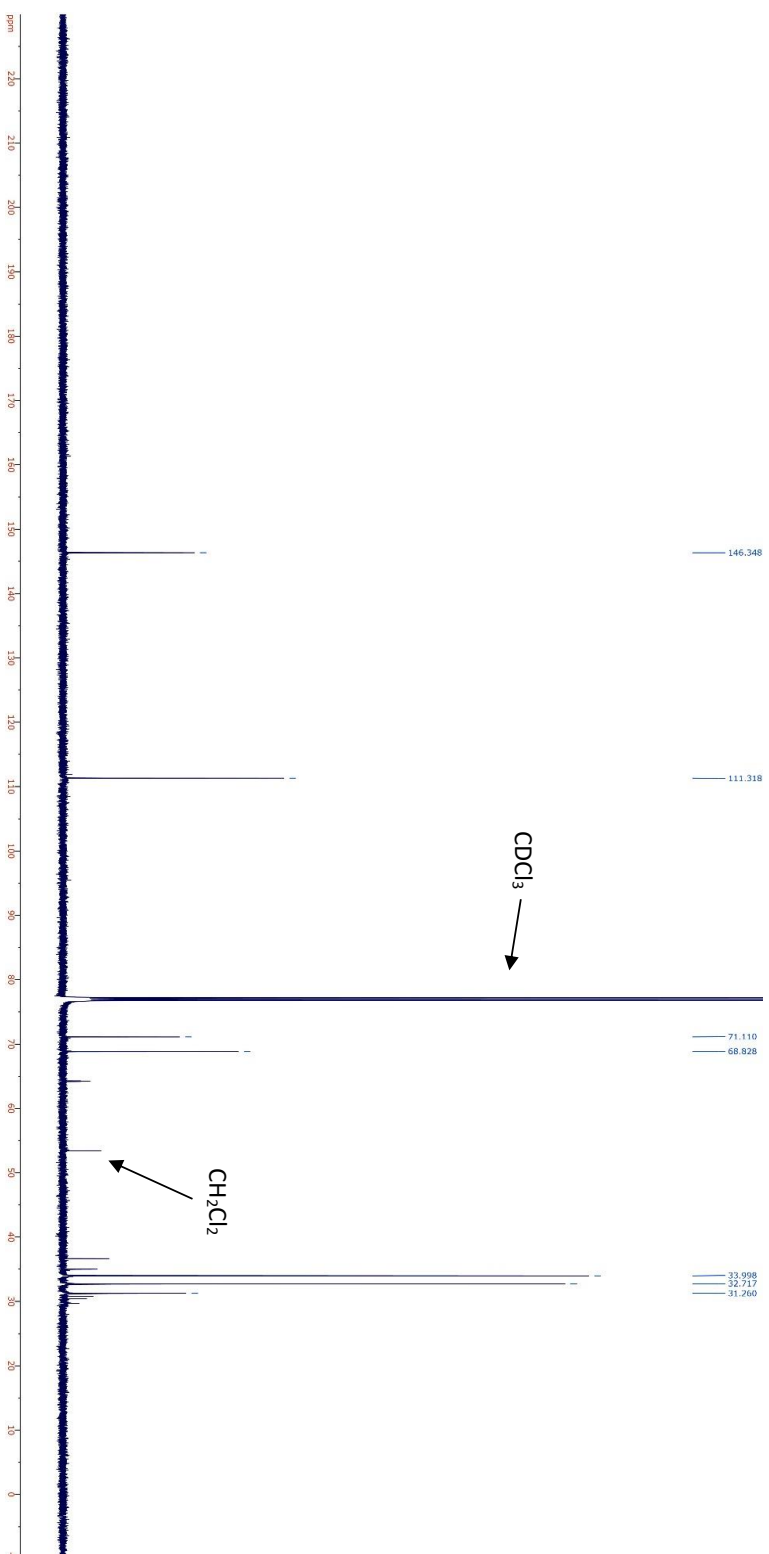

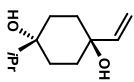

SI-45 ( $^1\text{H}$  NMR, 600 MHz,  $\text{CDCl}_3$ , 25  $^\circ\text{C}$ )

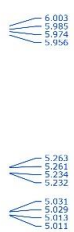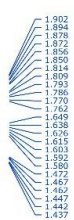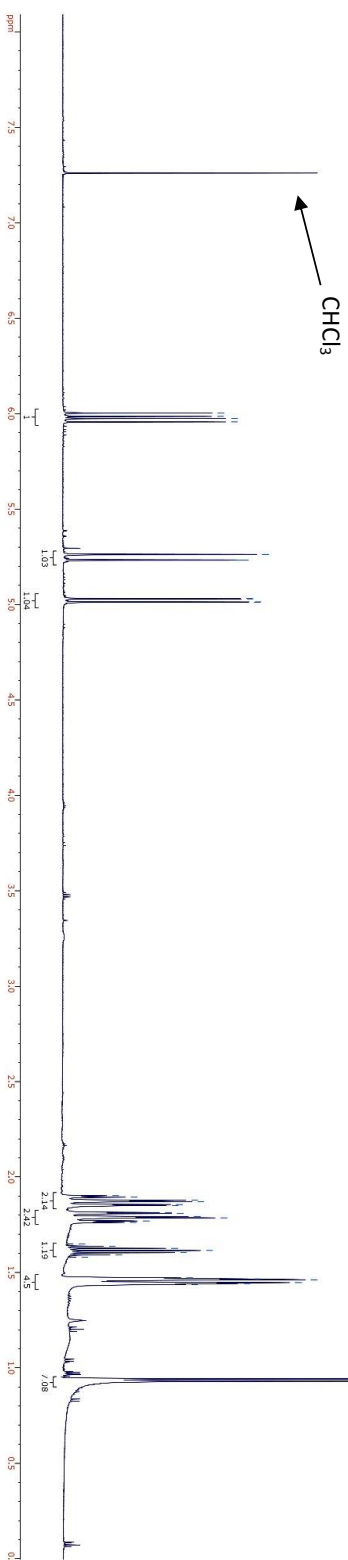

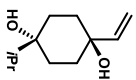

SI-45 (NOESY, CDCl<sub>3</sub>, 25 °C)

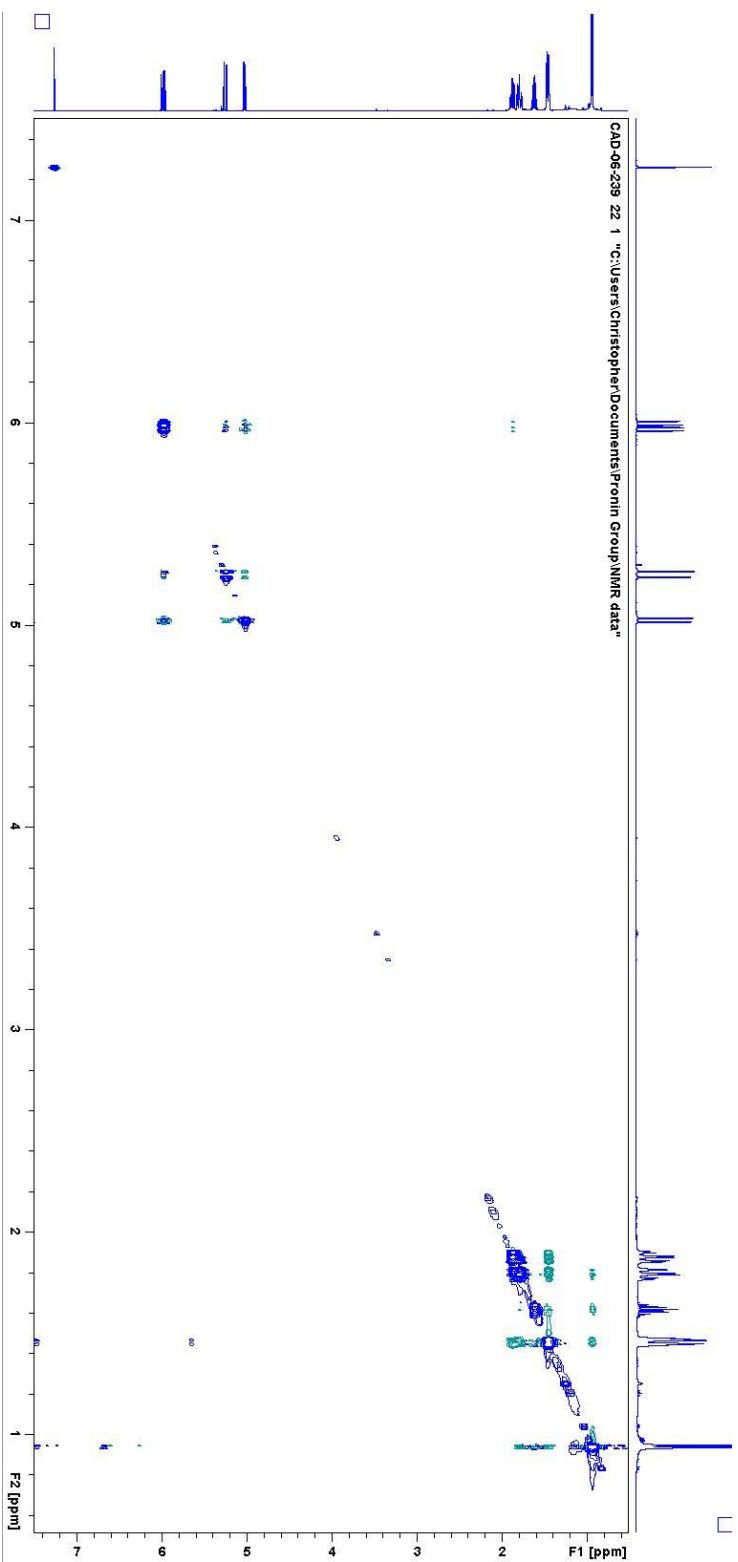

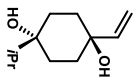

SI-45 ( $^{13}\text{C}$  NMR, 151 MHz,  $\text{CDCl}_3$ , 25 °C)

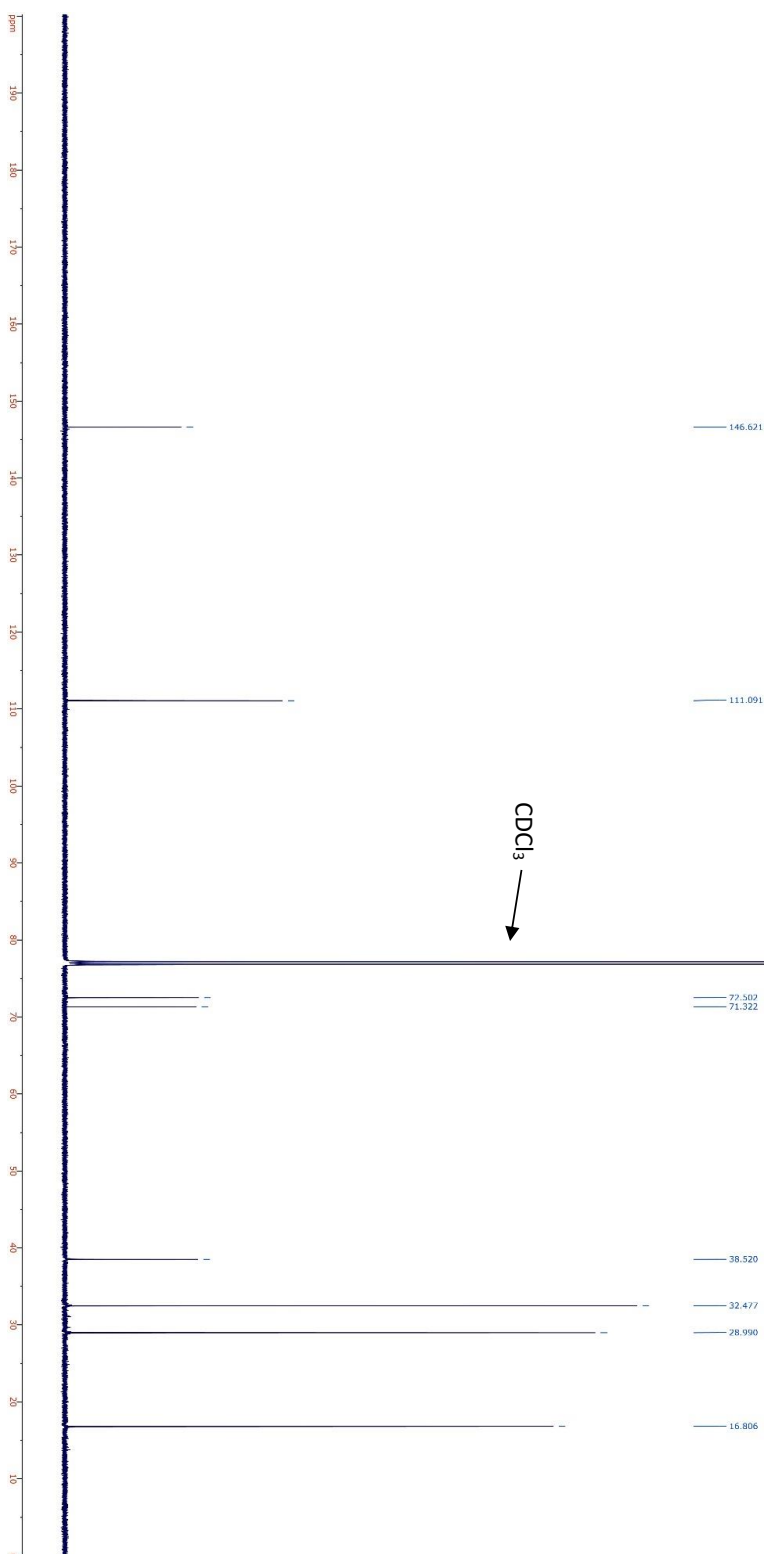

$^1\text{H}$  NMR of crude radical-polar crossover epoxidation using allylic alcohol **1** (12.8 mg, 0.10 mmol) and catalyst **8** with mesitylene (12 mg, 0.10 mmol) as the internal standard to determine  $^1\text{H}$  NMR yield. The methyl doublet of the epoxide **2** (1.23 ppm, d,  $J = 5.5$  Hz, 3H) is integrated against the aromatic C–H resonance of mesitylene (6.77 ppm, s, 3H) indicating 69%  $^1\text{H}$  NMR yield.

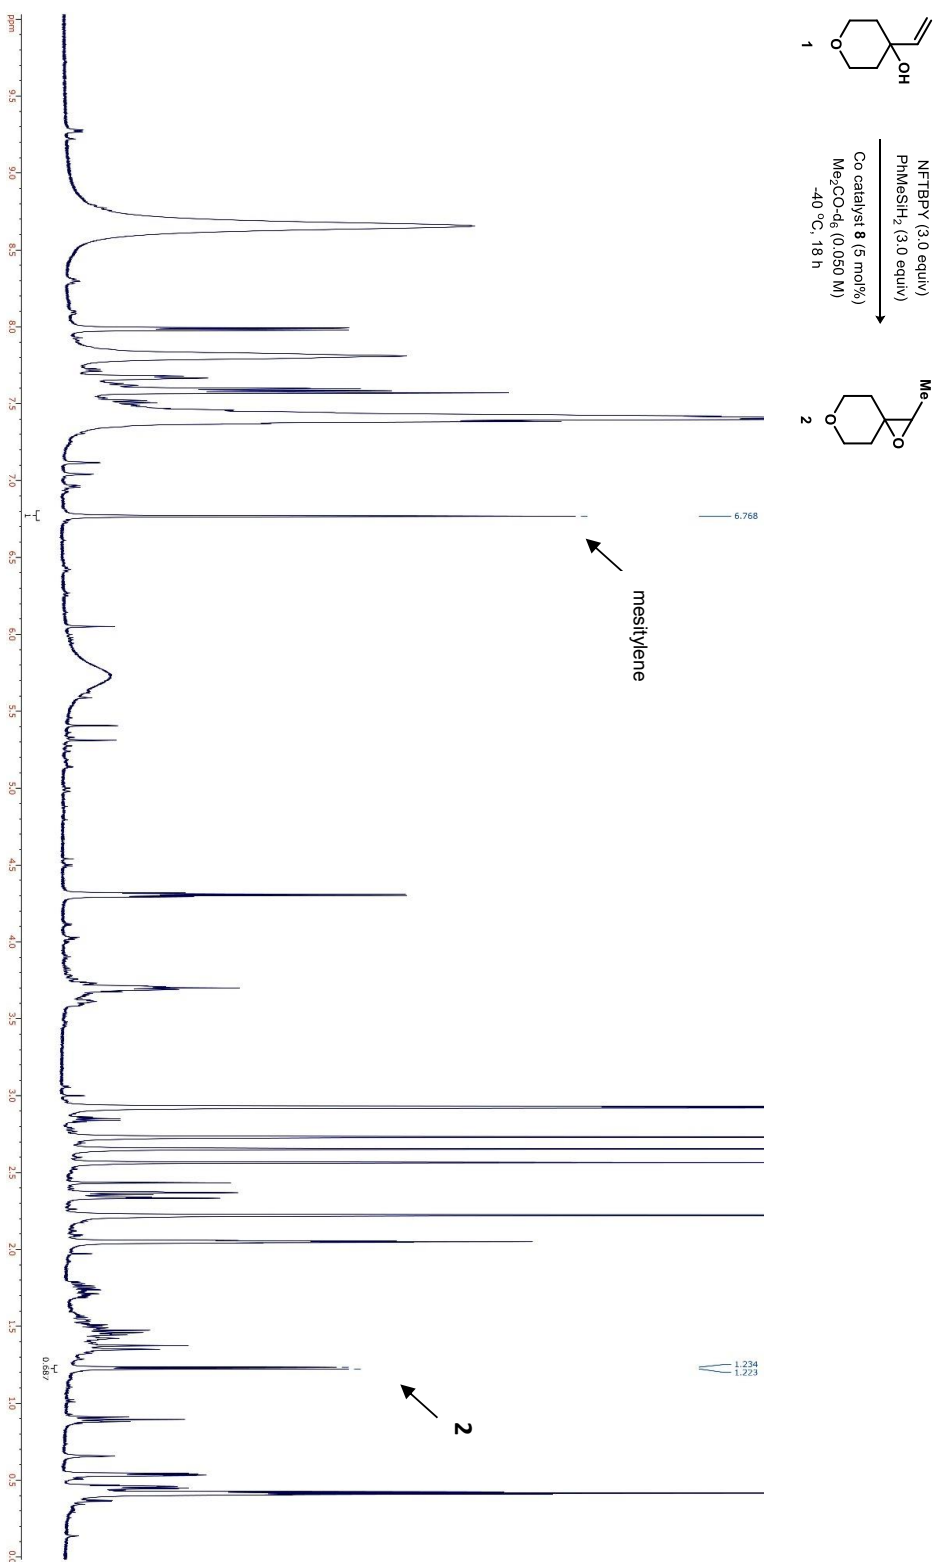



$^1\text{H}$  NMR of crude radical-polar crossover epoxidation using 4,4-difluoro-1-vinylcyclohexan-1-ol (16.2 mg, 0.10 mmol) and catalyst **8** with mesitylene (12 mg, 0.10 mmol) as the internal standard to determine  $^1\text{H}$  NMR yield. The methyl doublet of epoxide **14** (1.27 ppm, d,  $J = 5.5$  Hz, 3H) is integrated against the aromatic C–H resonance of mesitylene (6.77 ppm, s, 3H) indicating 53%  $^1\text{H}$  NMR yield.

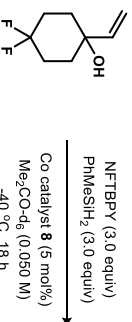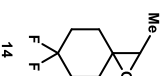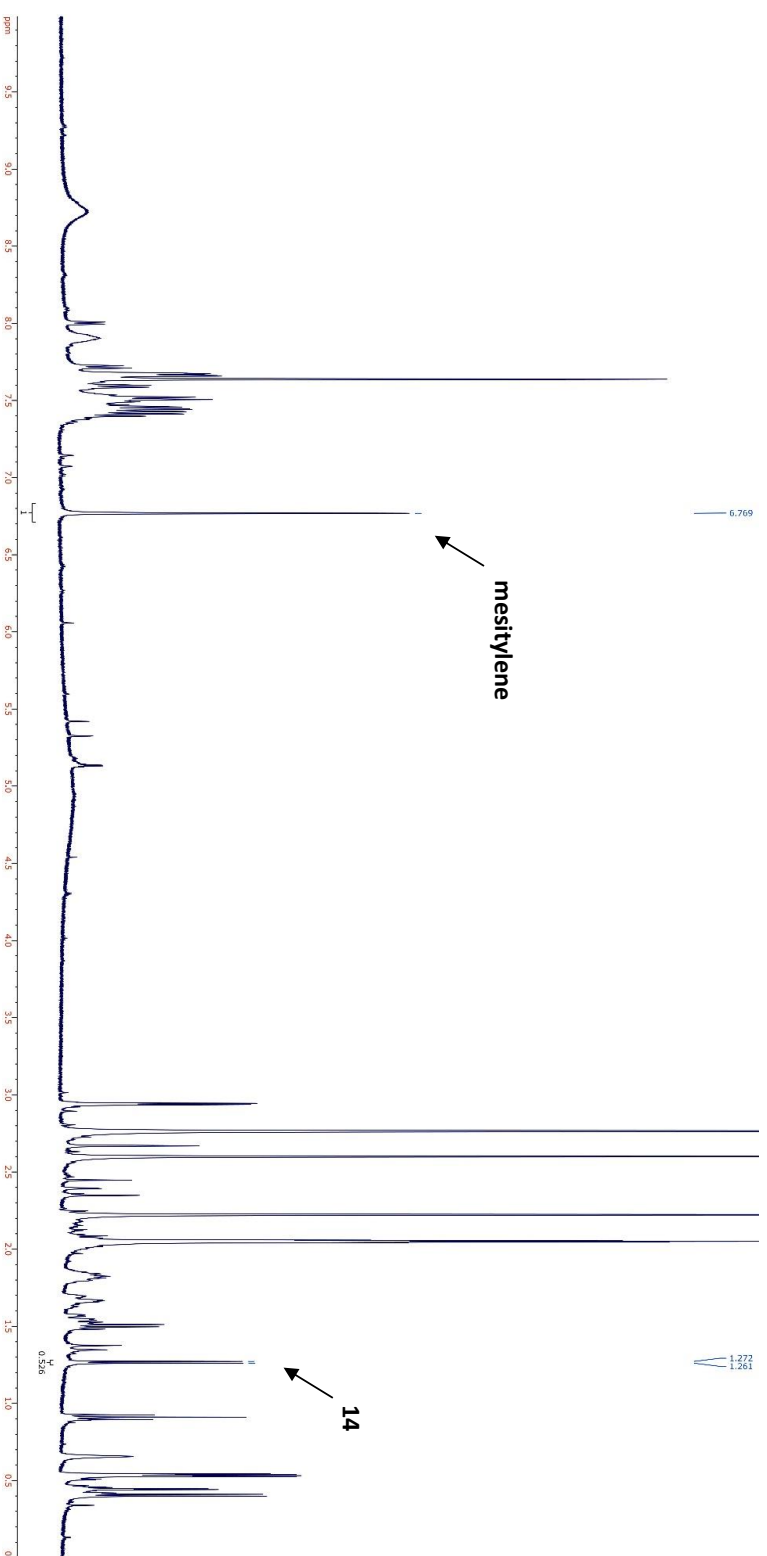

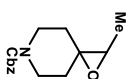

9 (<sup>1</sup>H NMR, 600 MHz, CDCl<sub>3</sub>, 25 °C)

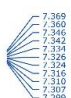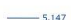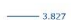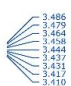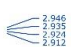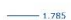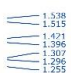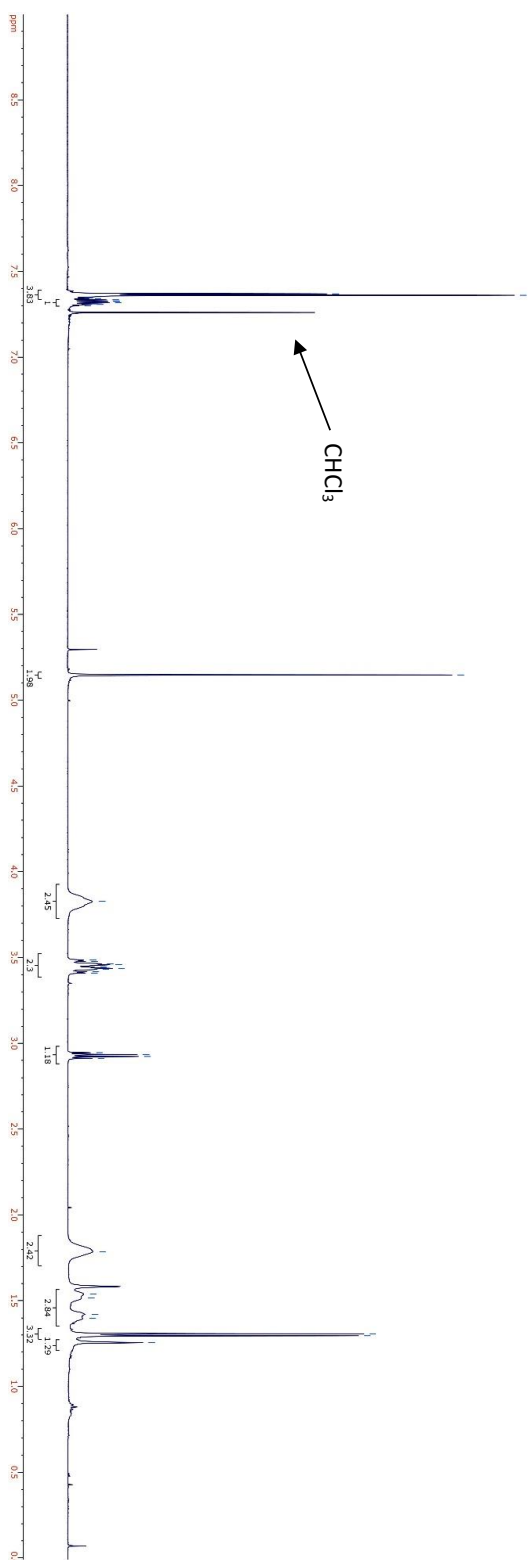

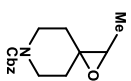

9 ( $^{13}\text{C}$  NMR, 151 MHz,  $\text{CDCl}_3$ , 25  $^\circ\text{C}$ )

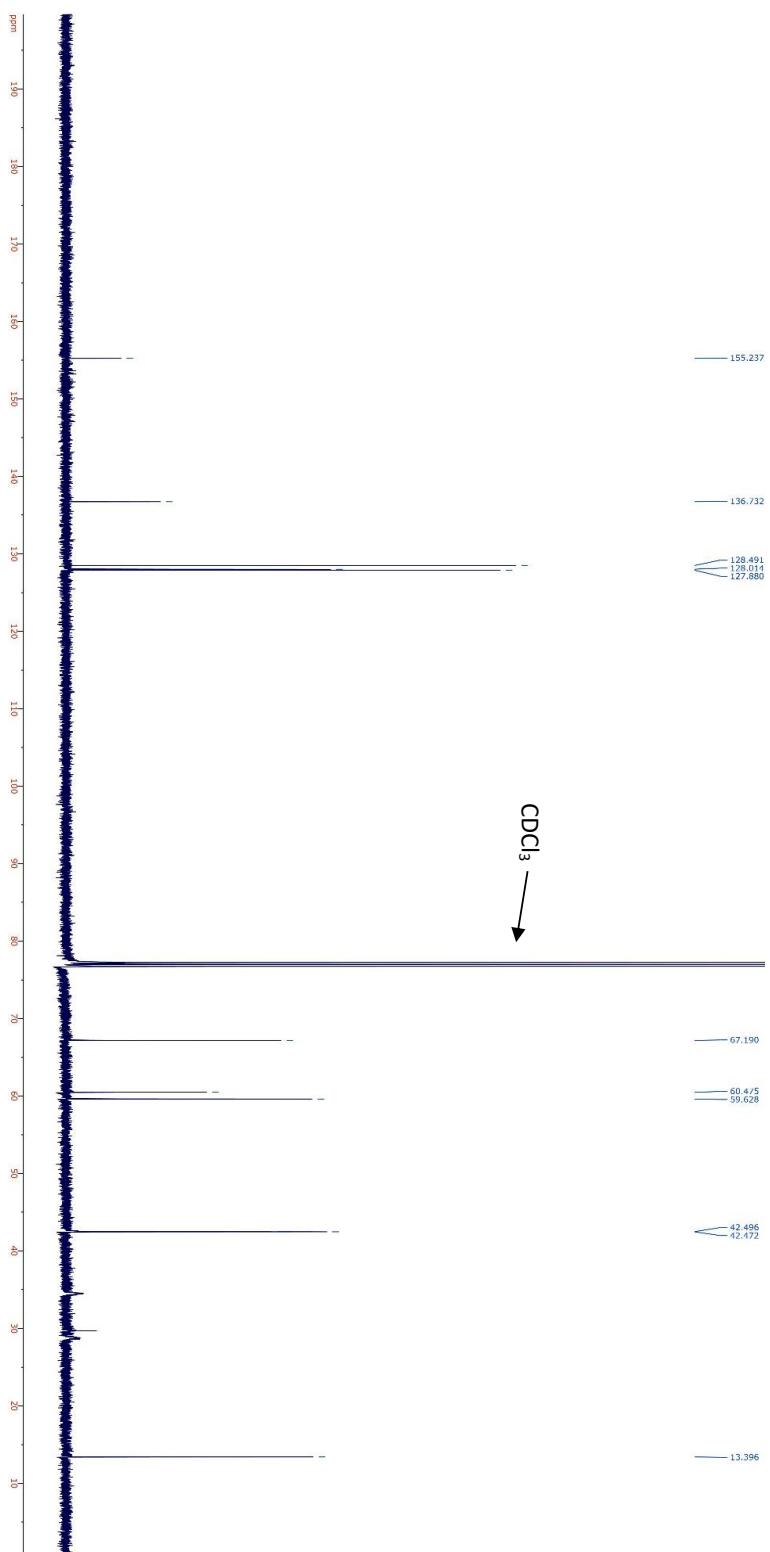

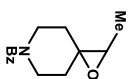

$^{10}$  ( $^1\text{H}$  NMR, 600 MHz, DMSO- $d_6$ , 100 °C)

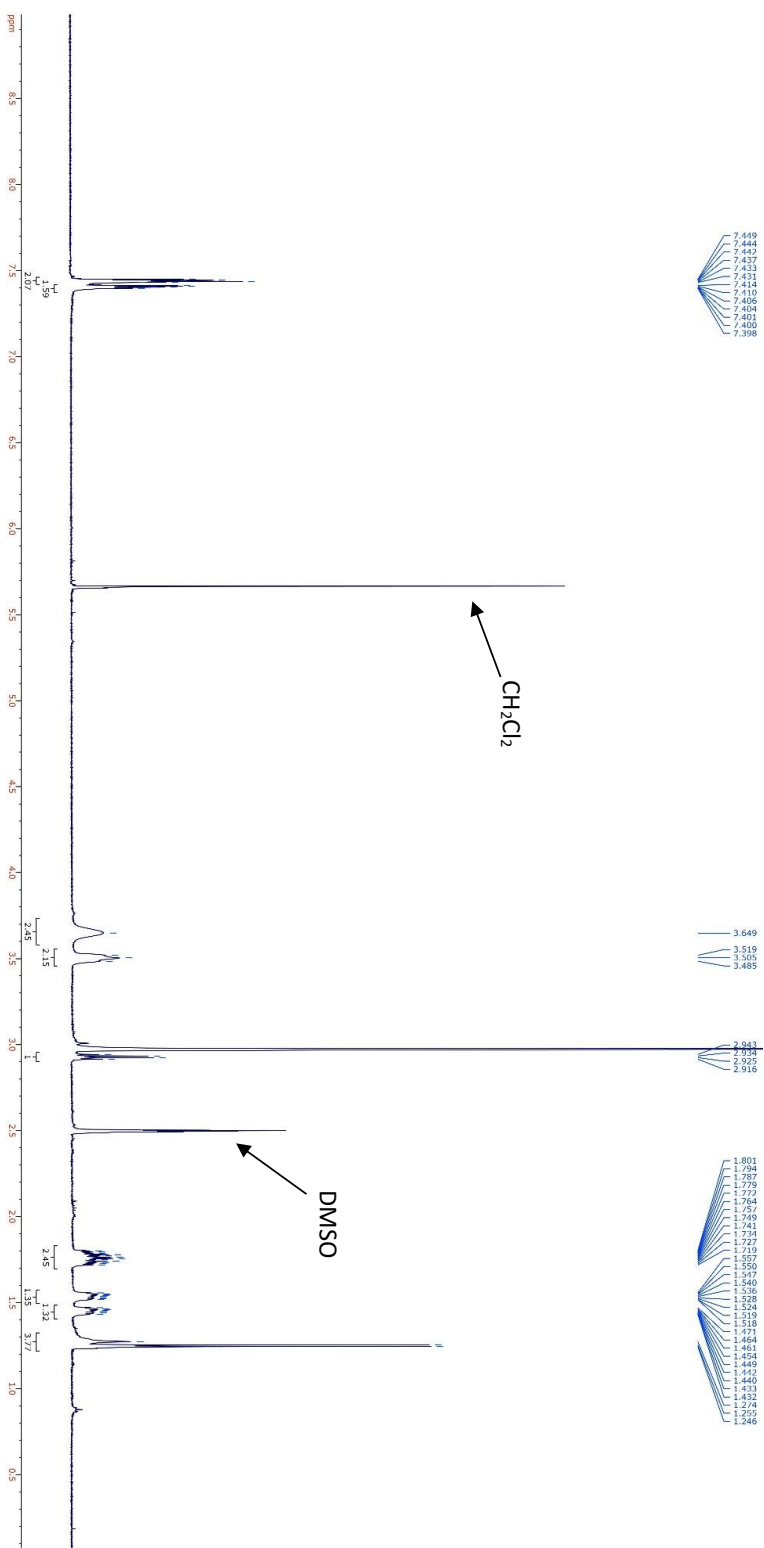

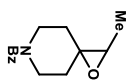

10 (<sup>13</sup>C NMR, 151 MHz, DMSO-d<sub>6</sub>, 100 °C)

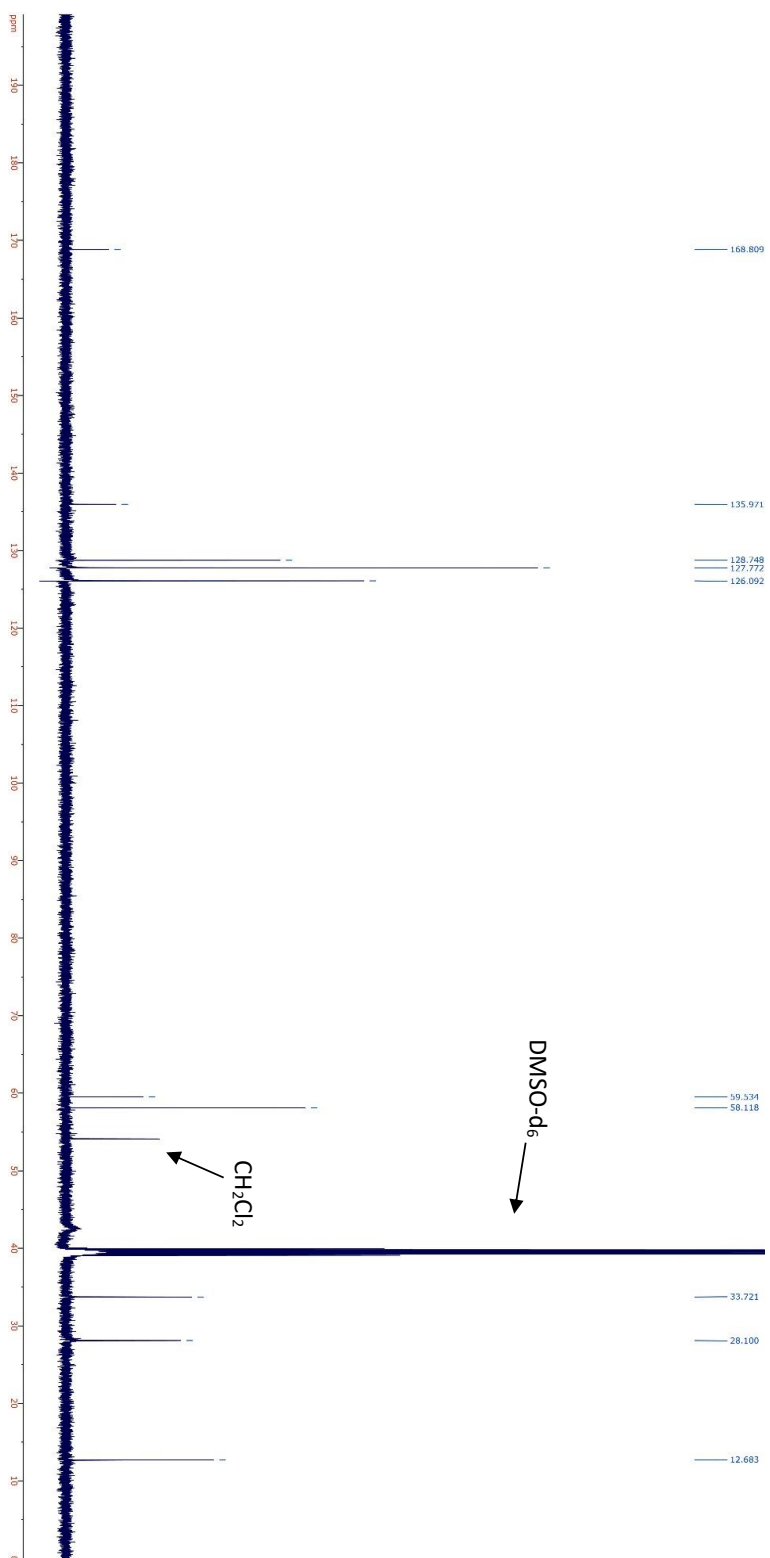

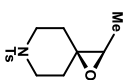

<sup>1</sup>H NMR, 600 MHz, CDCl<sub>3</sub>, 25 °C)

7.655  
/ 641

7.329  
/ 7.315

3.576  
3.573  
3.568  
3.566  
3.561  
3.557  
3.549  
3.546  
3.544  
3.539  
3.535  
3.528  
3.525  
3.520  
3.517  
3.514  
3.509  
3.506  
3.501  
3.499  
2.895  
2.885  
2.876  
2.867  
2.817  
2.812  
2.799  
2.791  
2.788  
2.780  
2.775  
2.770  
2.756  
2.751  
2.435  
2.054  
2.046  
2.042  
2.035  
2.031  
2.028  
2.013  
2.005  
1.994  
1.986  
1.976  
1.971  
1.969  
1.964  
1.953  
1.945  
1.556  
1.553  
1.550  
1.548  
1.545  
1.543  
1.540  
1.533  
1.530  
1.527  
1.522  
1.520  
1.517  
1.502  
1.389  
1.387  
1.384  
1.382  
1.379  
1.376  
1.369  
1.366  
1.364  
1.362  
1.359  
1.357  
1.353  
1.249  
1.240

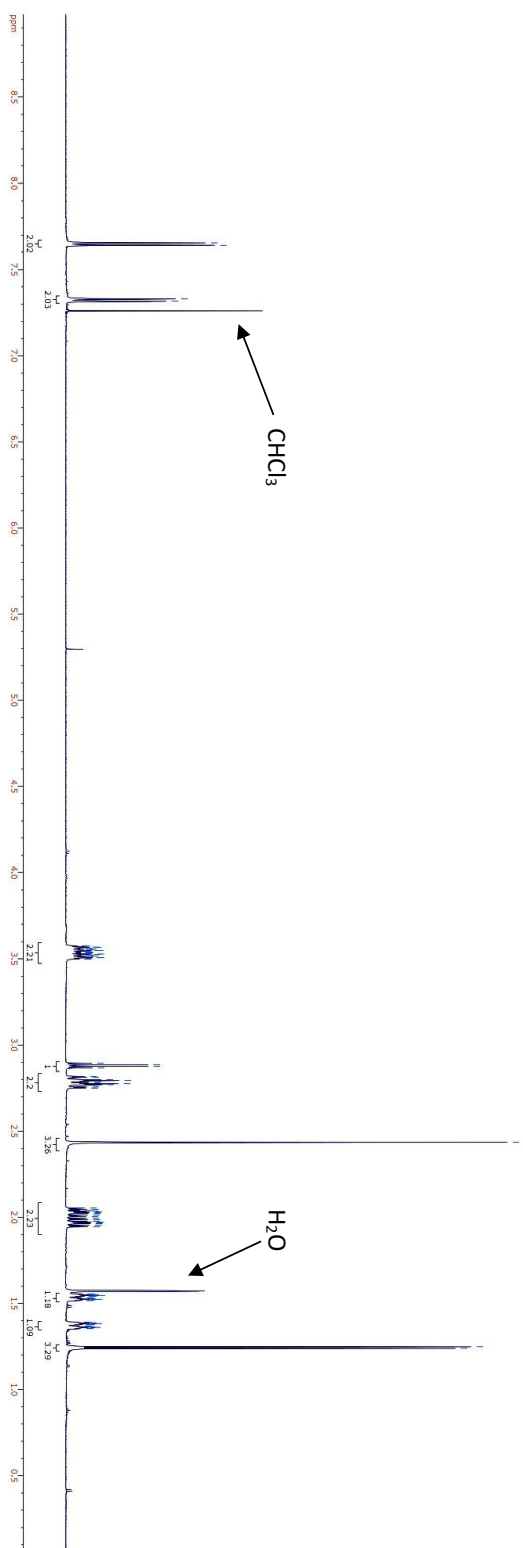

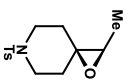

11 ( $^{13}\text{C}$  NMR, 151 MHz,  $\text{CDCl}_3$ , 25  $^\circ\text{C}$ )

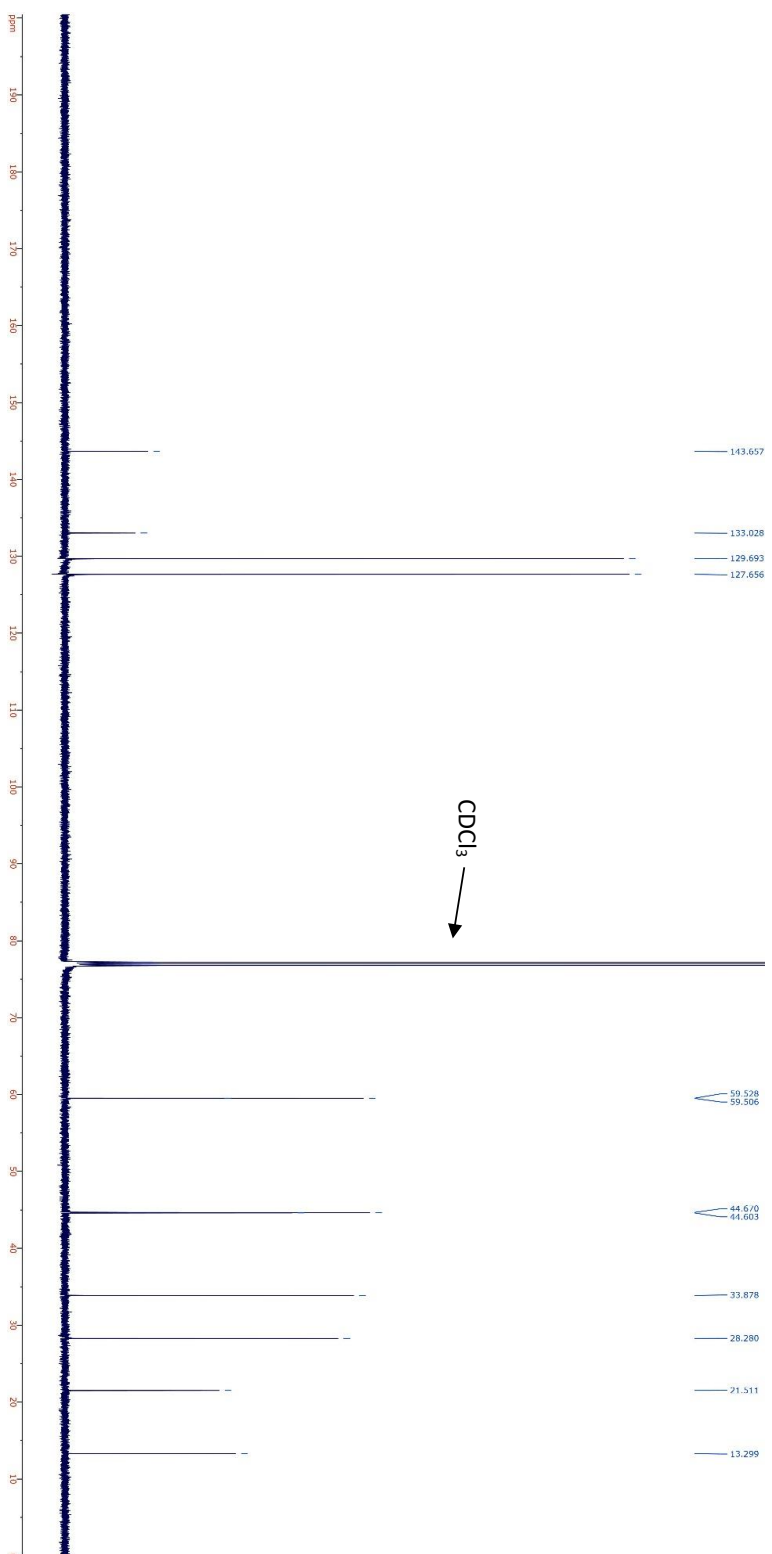

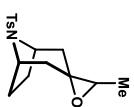

$^{13}\text{C}$  NMR, 600 MHz,  $\text{CDCl}_3$ , 25 °C)

7.761  
7.747

7.285  
7.272

4.354  
4.349  
4.344  
4.295  
4.290  
4.285

2.652  
2.643  
2.634  
2.626  
2.620  
2.470  
2.464  
2.424  
2.361  
2.335  
2.317  
2.311

1.938  
1.934  
1.929  
1.920  
1.913  
1.909  
1.907  
1.904  
1.902  
1.896  
1.454  
1.428  
1.424  
1.408  
1.405  
1.401  
1.245  
1.241  
1.238  
1.222  
1.218  
1.214

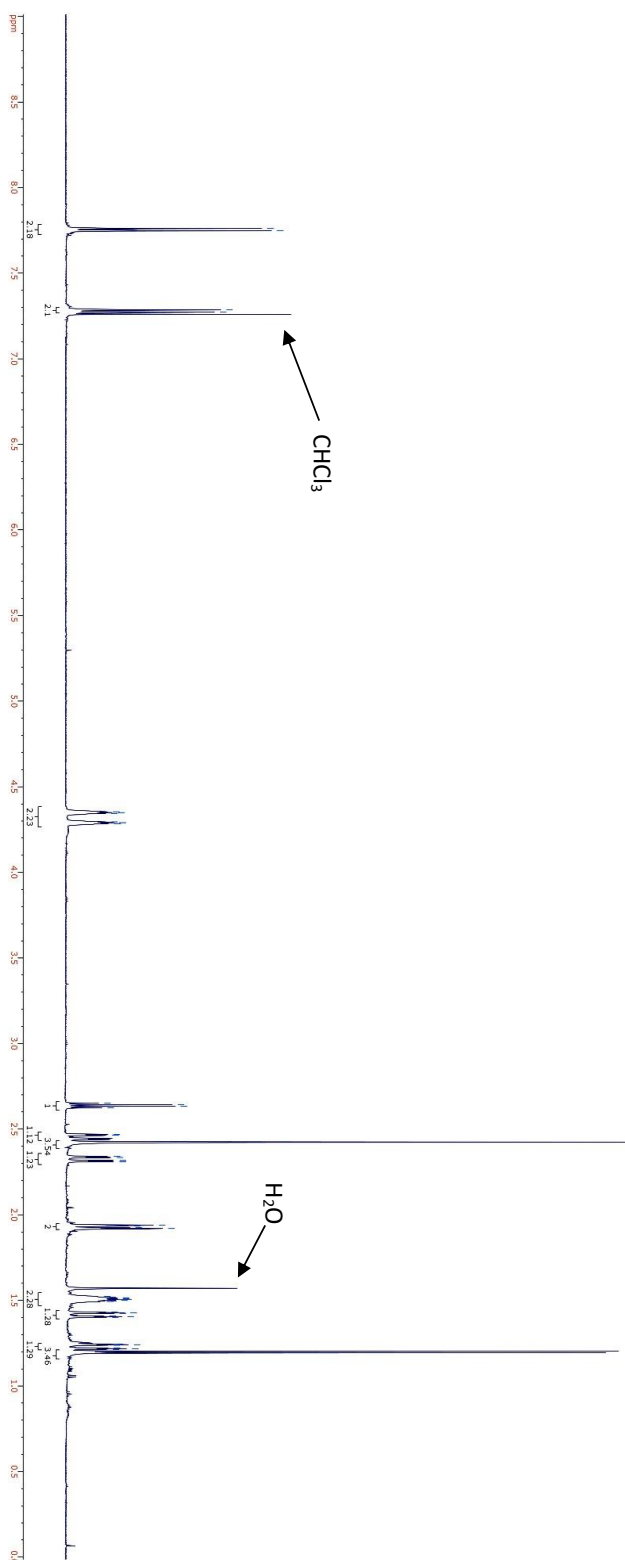



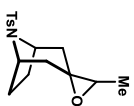

$^{13}\text{C}$  NMR, 151 MHz,  $\text{CDCl}_3$ , 25  $^\circ\text{C}$ )

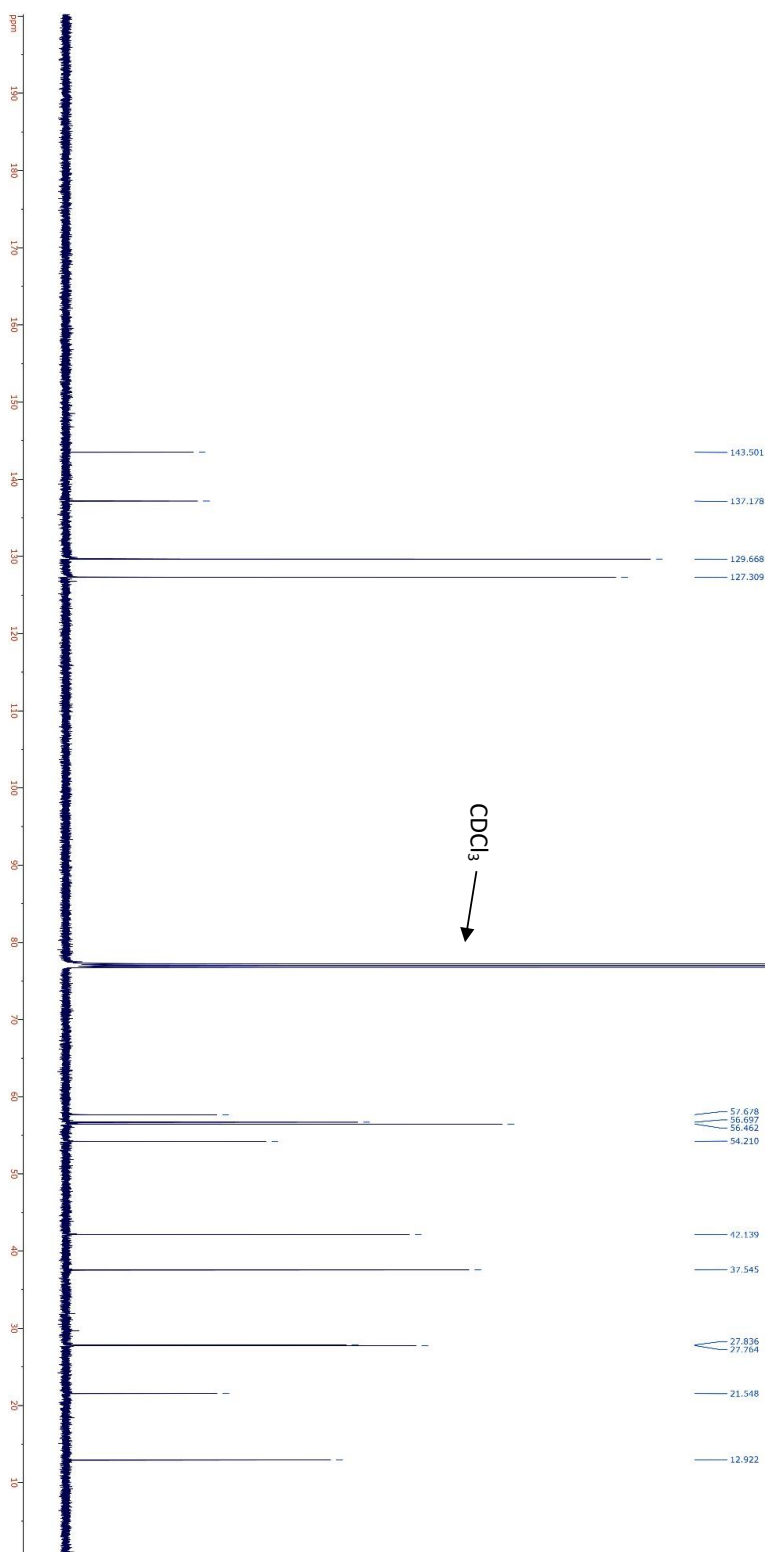

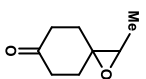

15 (<sup>1</sup>H NMR, 800 MHz, CDCl<sub>3</sub>, 25 °C)

3.103  
3.094  
3.085  
3.076  
2.657  
2.654  
2.686  
2.684  
2.678  
2.676  
2.672  
2.670  
2.668  
2.666  
2.660  
2.658  
2.655  
2.654  
2.651  
2.647  
2.643  
2.641  
2.639  
2.637  
2.633  
2.631  
2.629  
2.627  
2.623  
2.620  
2.615  
2.612  
2.605  
2.602  
2.467  
2.464  
2.458  
2.455  
2.449  
2.446  
2.445  
2.442  
2.433  
2.431  
2.426  
2.424  
2.420  
2.417  
2.411  
2.408  
2.402  
2.399  
2.115  
2.113  
2.106  
2.104  
2.096  
2.095  
2.092  
2.090  
2.087  
2.086  
2.083  
2.081  
2.072  
2.063  
2.054  
2.053  
2.049  
2.047  
2.045  
2.044  
2.039  
2.031  
2.029  
2.022  
2.020  
1.907  
1.903  
1.897  
1.893  
1.887  
1.881  
1.880  
1.873  
1.870  
1.864  
1.860  
1.778  
1.774  
1.769  
1.765  
1.755  
1.751  
1.746  
1.742  
1.736  
1.732  
1.727  
1.363

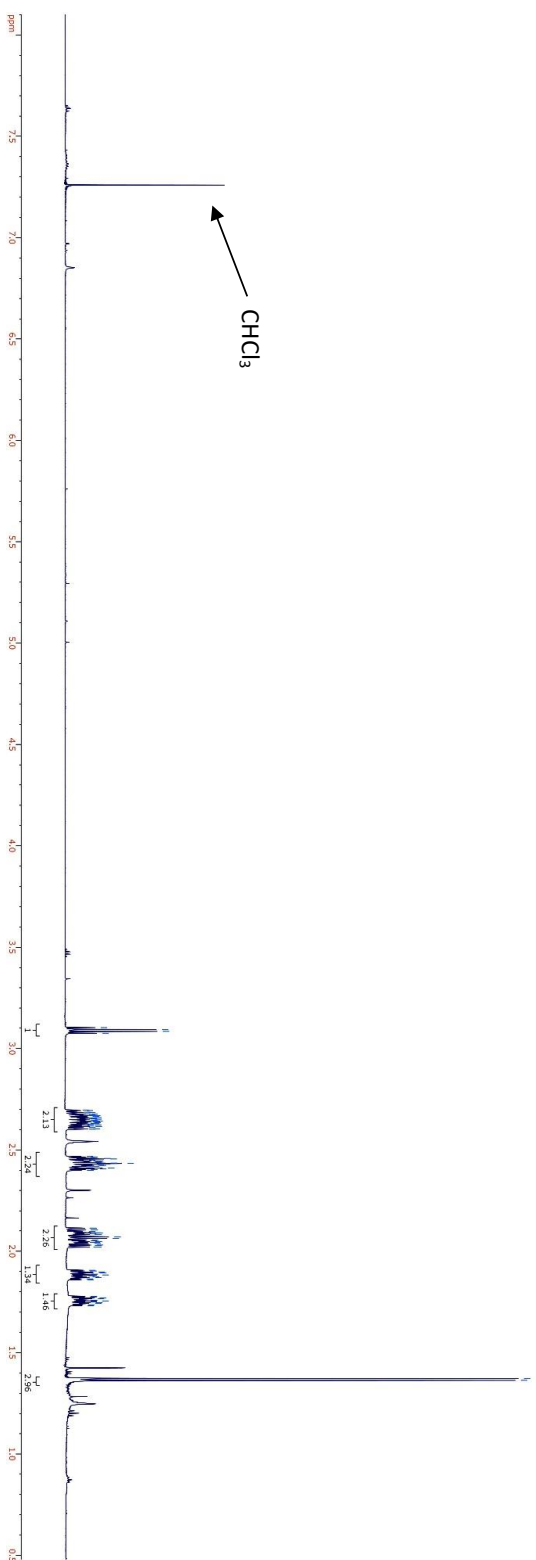

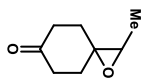

15 ( $^{13}\text{C}$  NMR, 151 MHz,  $\text{CDCl}_3$ , 25  $^\circ\text{C}$ )

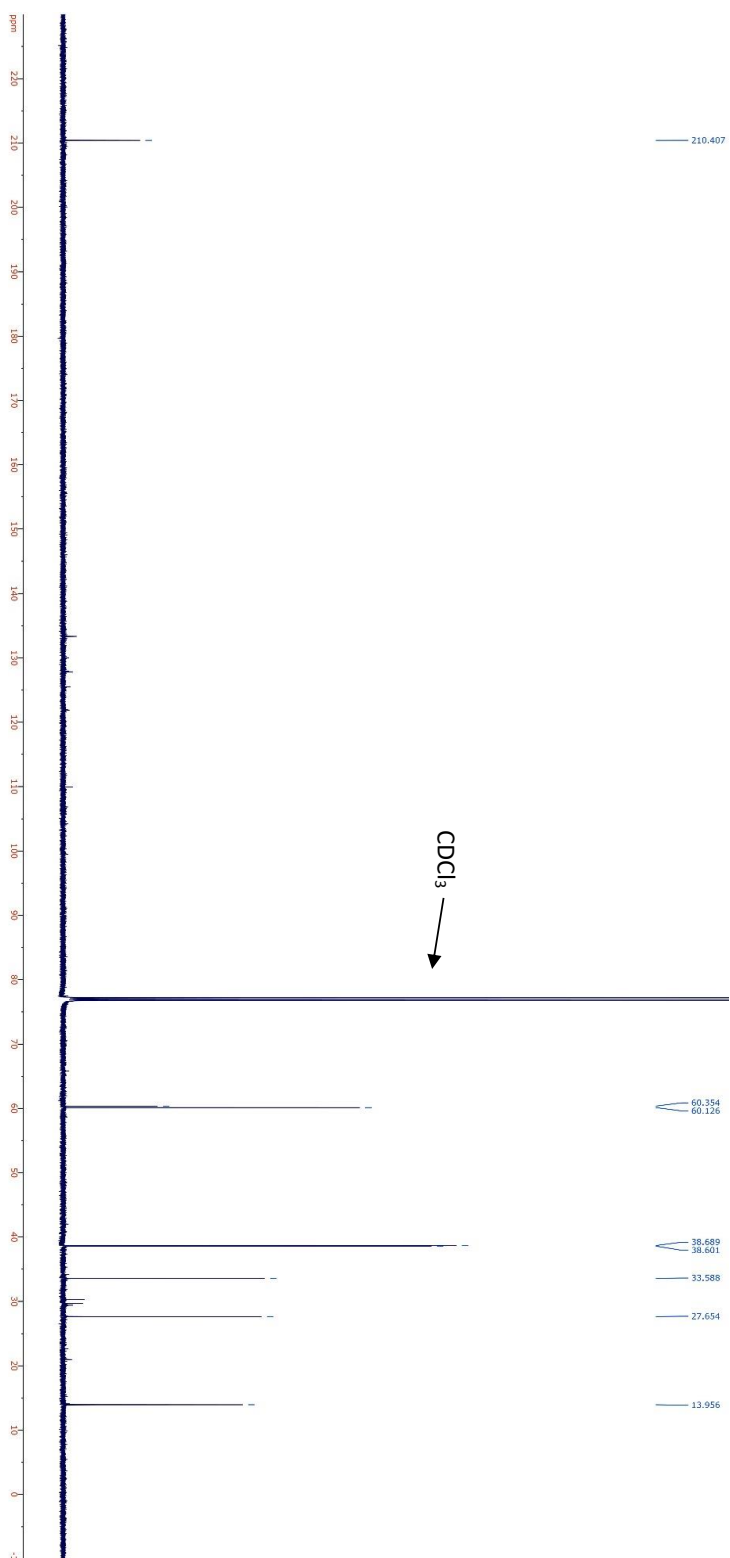

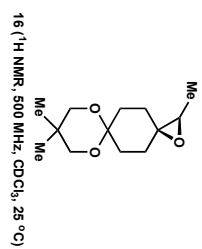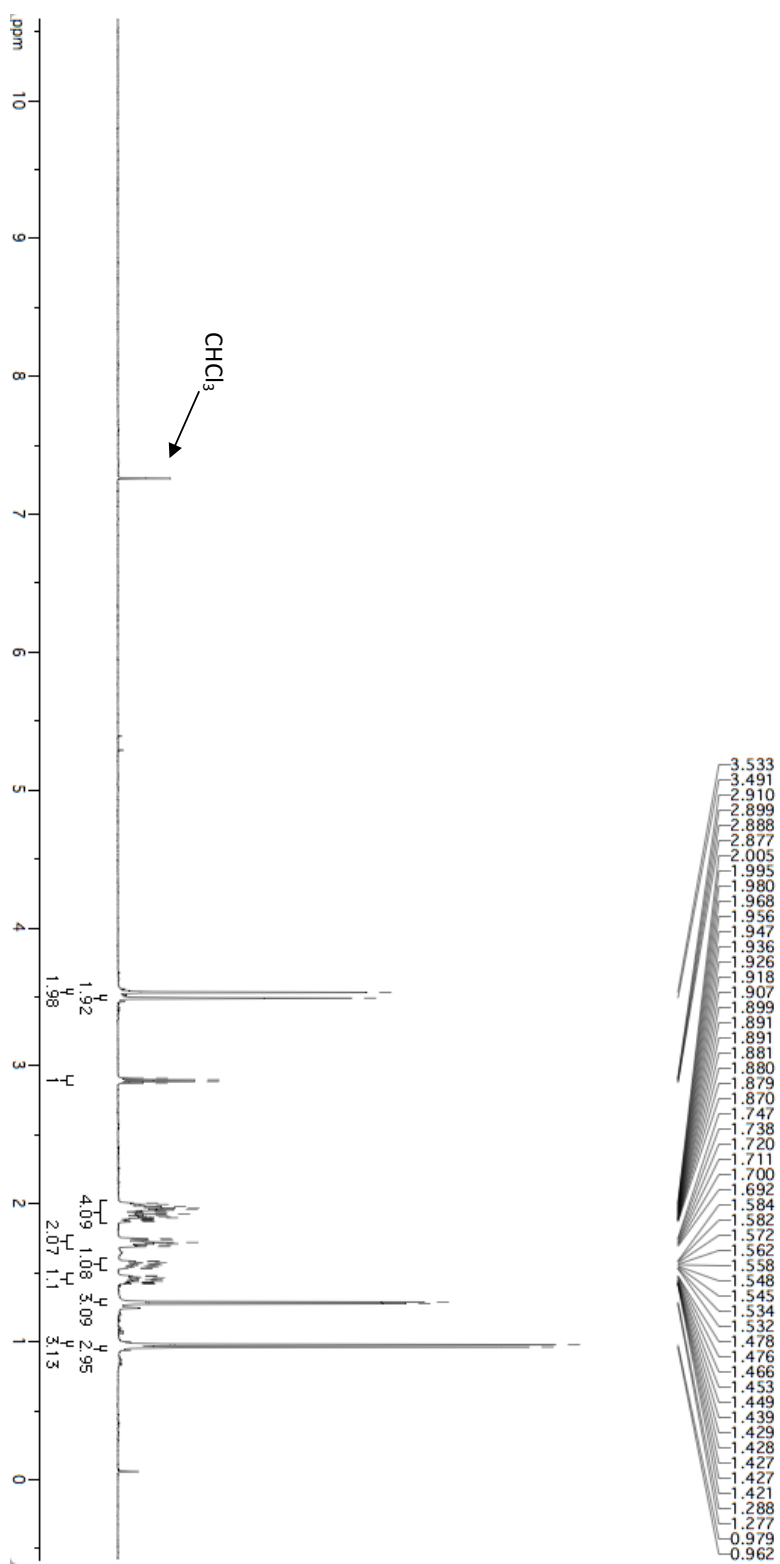

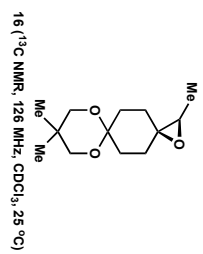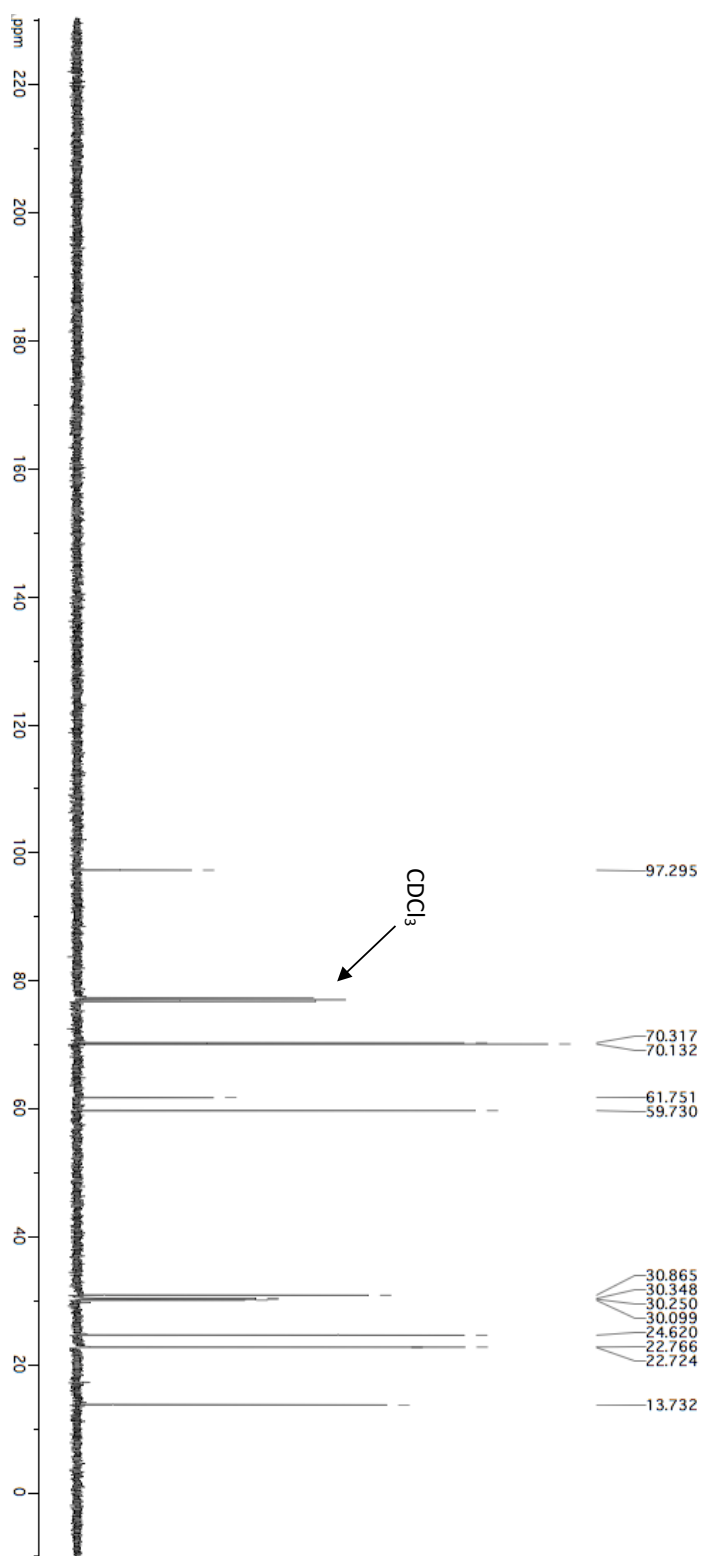

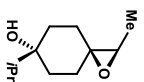

17 ( $^1\text{H}$  NMR, 600 MHz,  $\text{CDCl}_3$ , 25  $^\circ\text{C}$ )

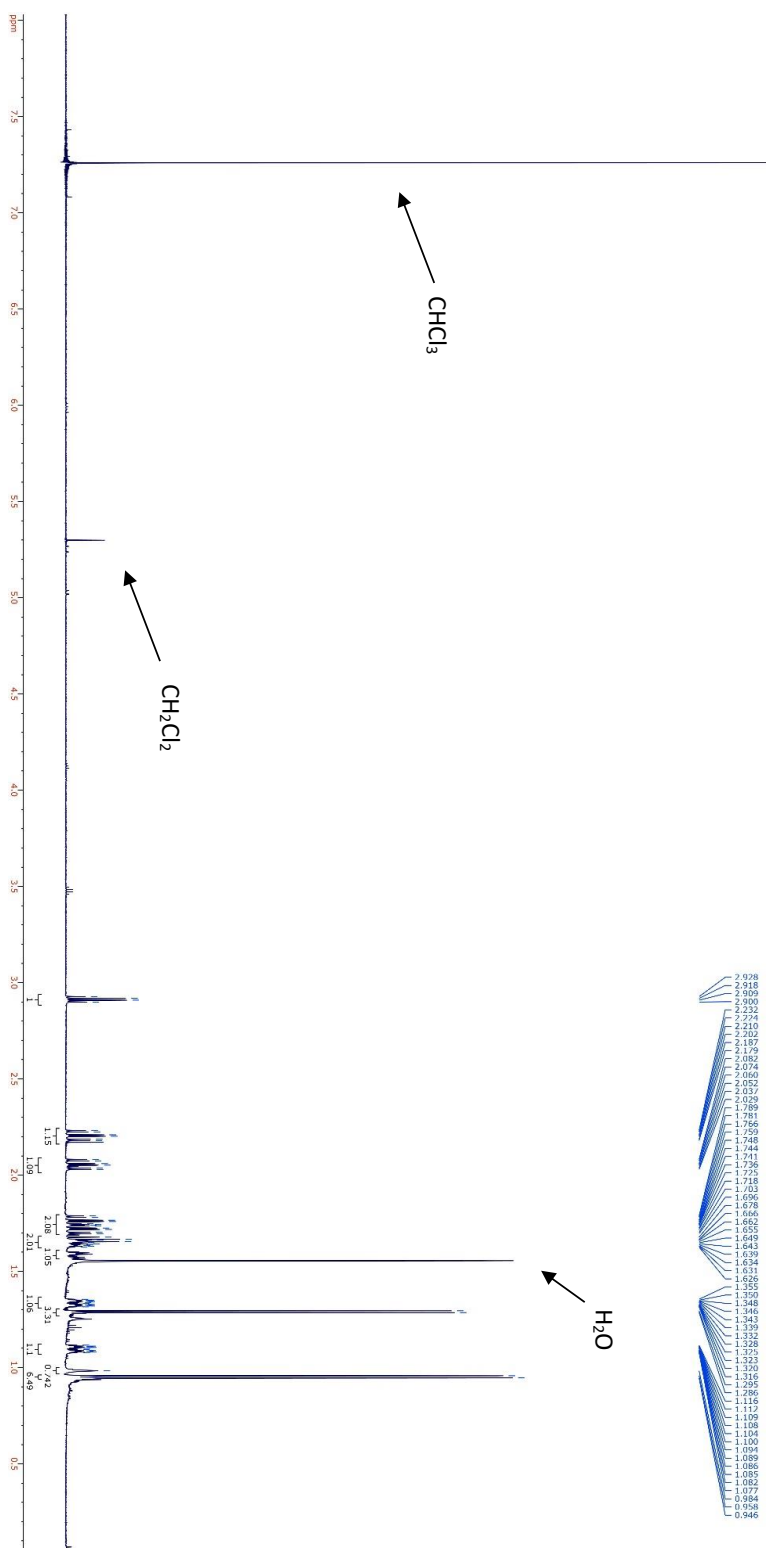

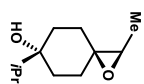

17 ( $^{13}\text{C}$  NMR, 151 MHz,  $\text{CDCl}_3$ , 25  $^\circ\text{C}$ )

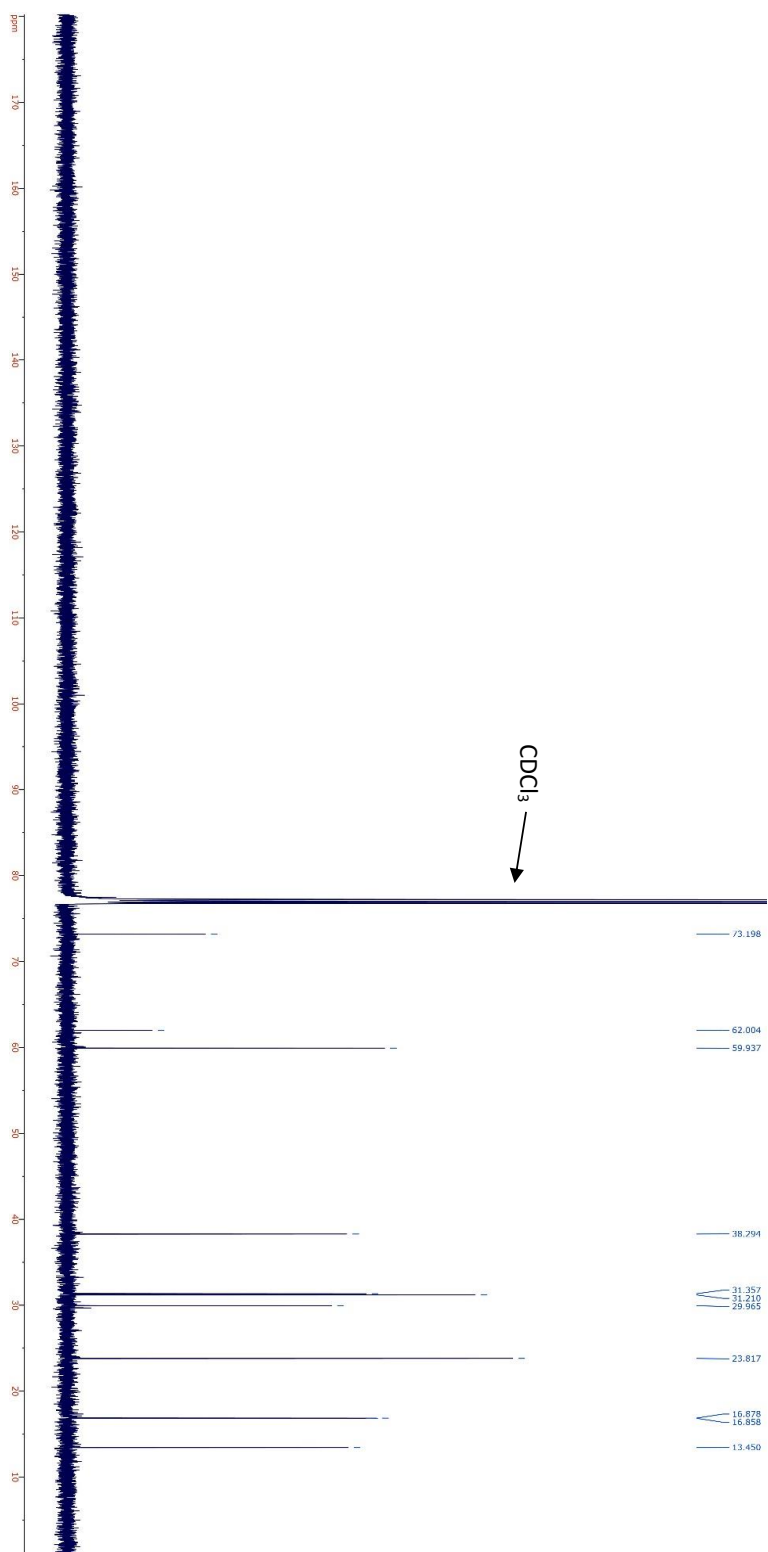

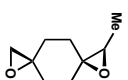

$^{19}\text{F}$  NMR, 500 MHz,  $\text{CDCl}_3$ , 25 °C)

2.978  
2.967  
2.956  
2.945  
2.714  
2.129  
2.118  
2.112  
2.089  
2.070  
2.060  
2.051  
2.043  
2.032  
2.025  
2.015  
2.005  
1.998  
1.978  
1.971  
1.956  
1.948  
1.621  
1.618  
1.611  
1.603  
1.600  
1.592  
1.584  
1.573  
1.566  
1.503  
1.495  
1.488  
1.484  
1.477  
1.470  
1.456  
1.332  
1.321

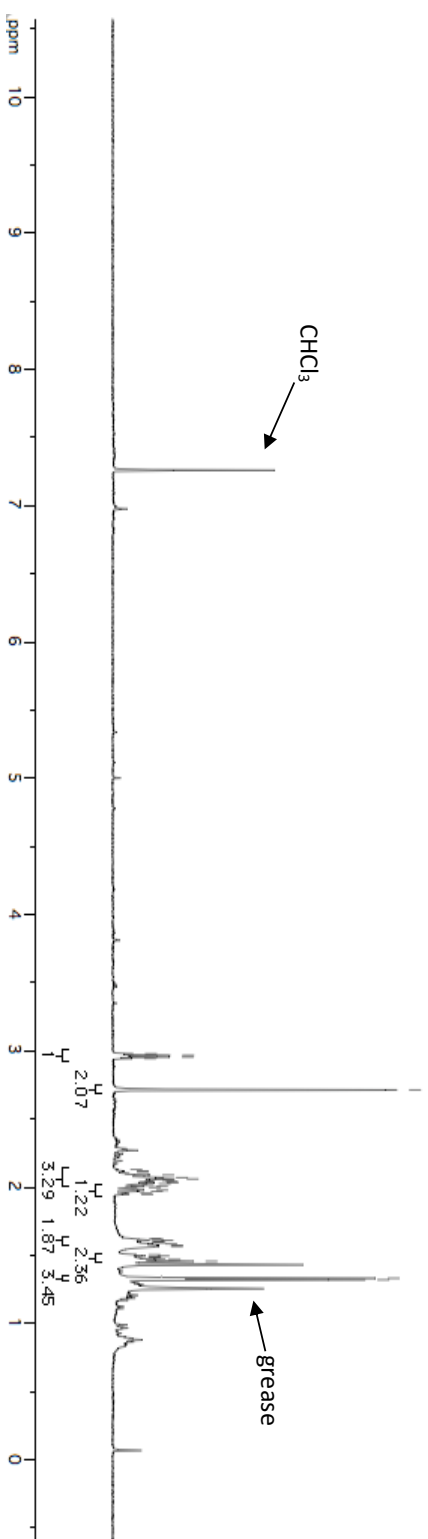



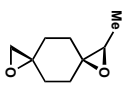

19 (<sup>13</sup>C NMR, 126 MHz, CDCl<sub>3</sub>, 25 °C)

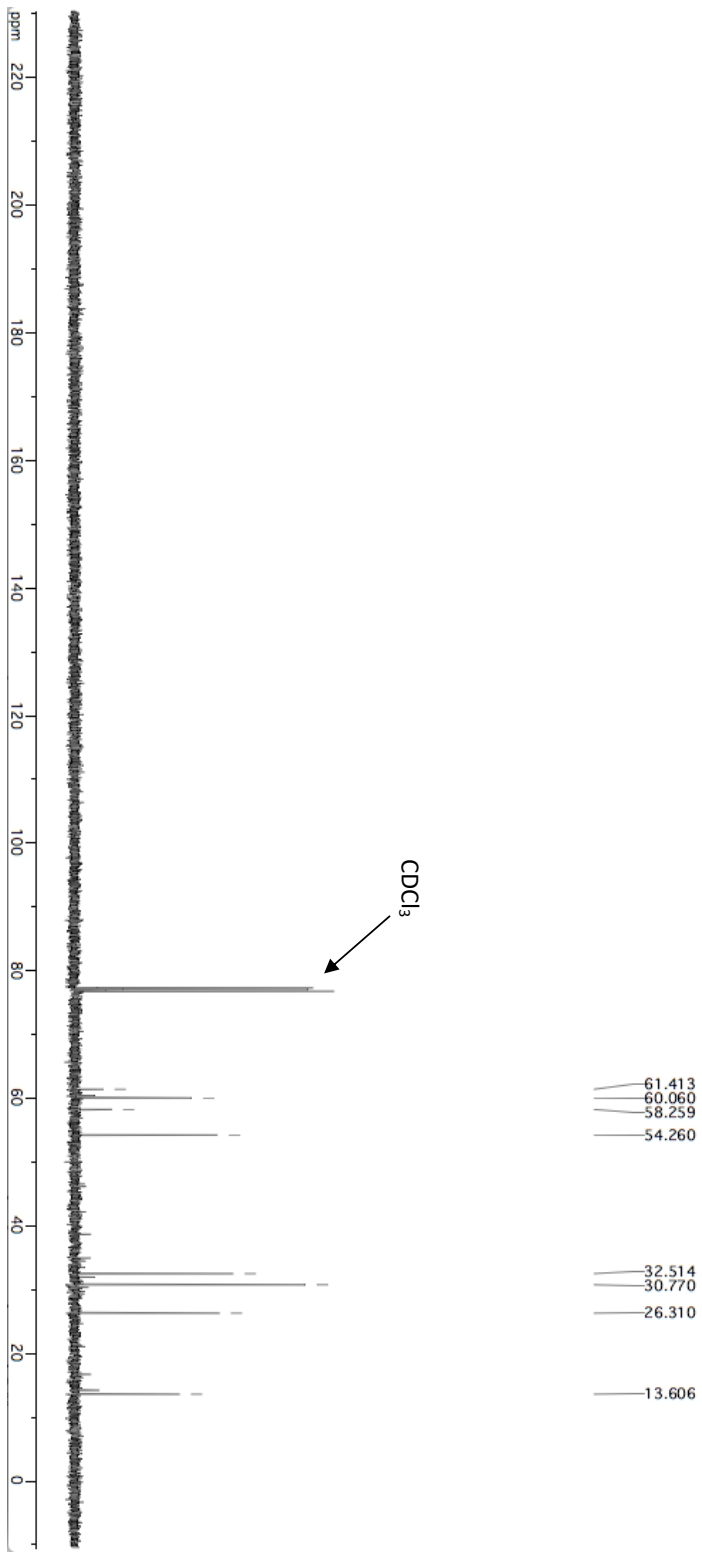

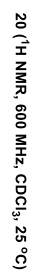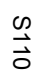

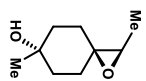

20 ( $^{13}\text{C}$  NMR, 151 MHz,  $\text{CDCl}_3$ , 25  $^\circ\text{C}$ )

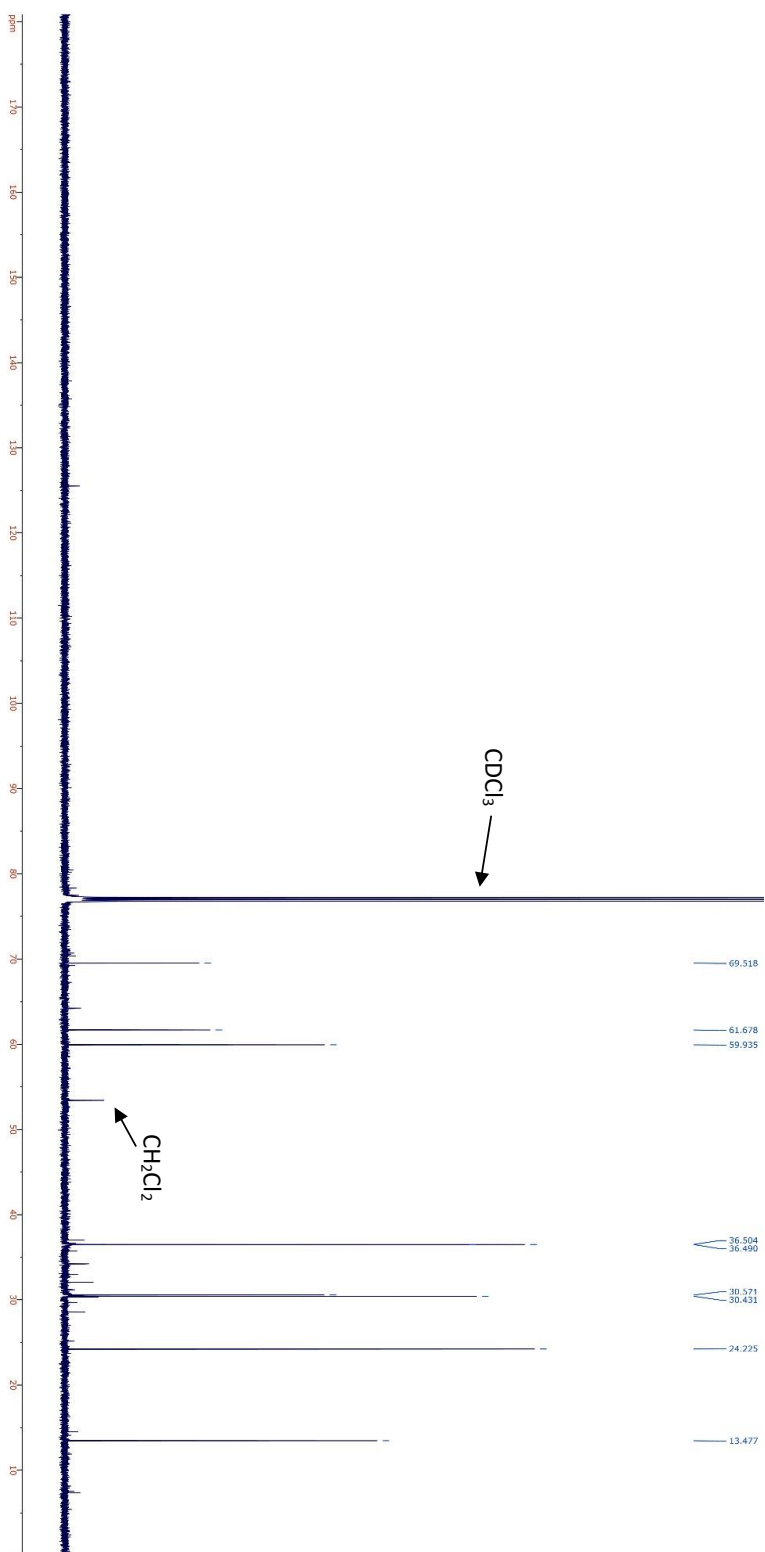

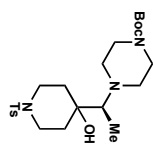

27 ( $^1\text{H}$  NMR, 500 MHz,  $\text{CDCl}_3$ , 25  $^\circ\text{C}$ )

7.648  
7.632  
7.312  
7.296

4.273  
3.659  
3.658  
3.657  
3.640  
3.639  
3.636  
3.636  
3.400  
3.369  
2.650  
2.645  
2.636  
2.619  
2.616  
2.603  
2.597  
2.594  
2.590  
2.417  
2.392  
2.375  
2.361  
2.349  
1.830  
1.821  
1.820  
1.804  
1.800  
1.800  
1.795  
1.788  
1.778  
1.768  
1.762  
1.753  
1.737  
1.727  
1.437  
1.420  
1.397  
1.369  
1.352  
1.325  
1.309  
1.017  
1.002

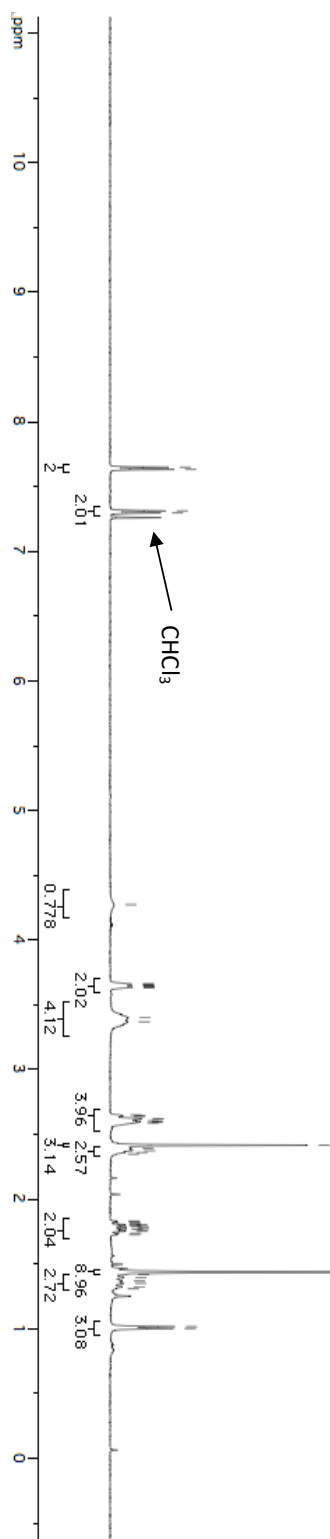

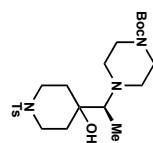

27 ( $^{13}\text{C}$  NMR, 126 MHz,  $\text{CDCl}_3$ , 25 °C)

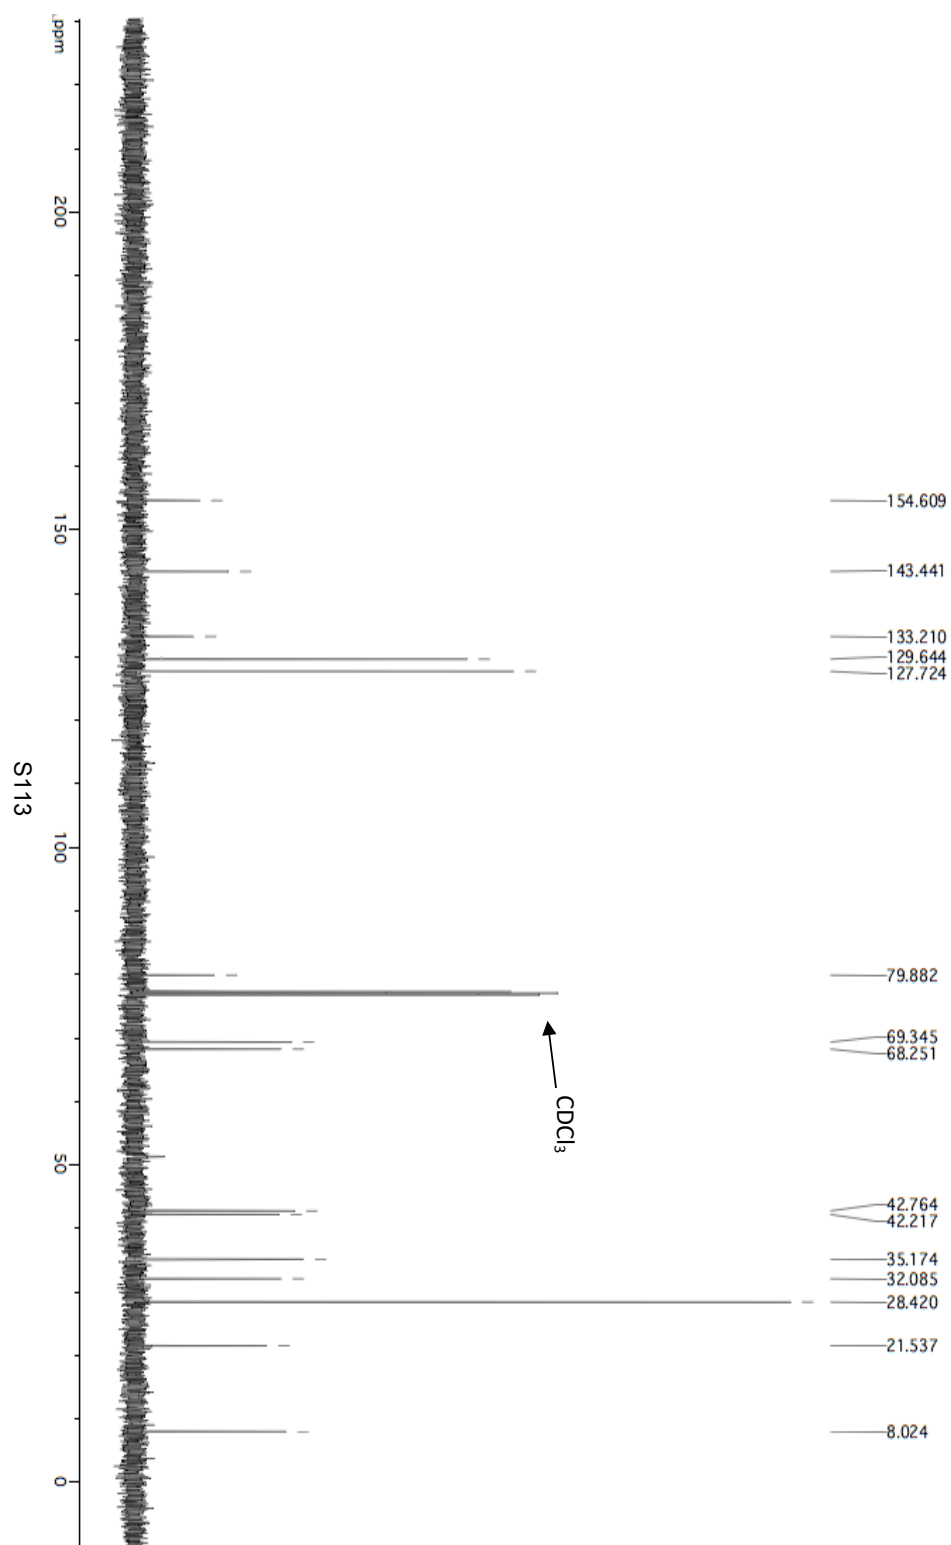

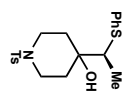

28 ( $^1\text{H}$  NMR, 500 MHz,  $\text{CDCl}_3$ , 25  $^\circ\text{C}$ )

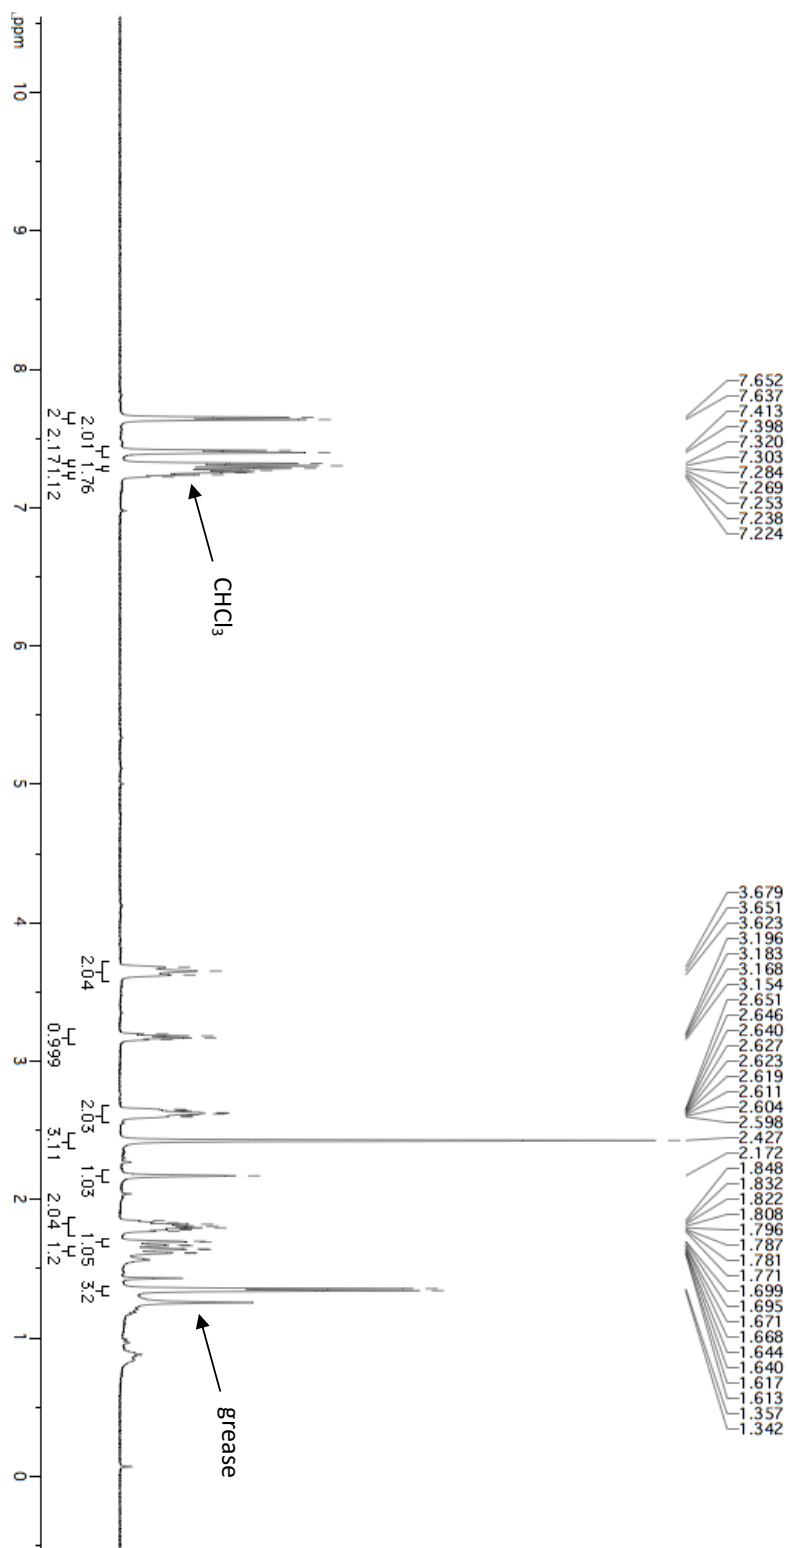

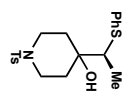

28 ( $^{13}\text{C}$  NMR, 126 MHz,  $\text{CDCl}_3$ , 25  $^\circ\text{C}$ )

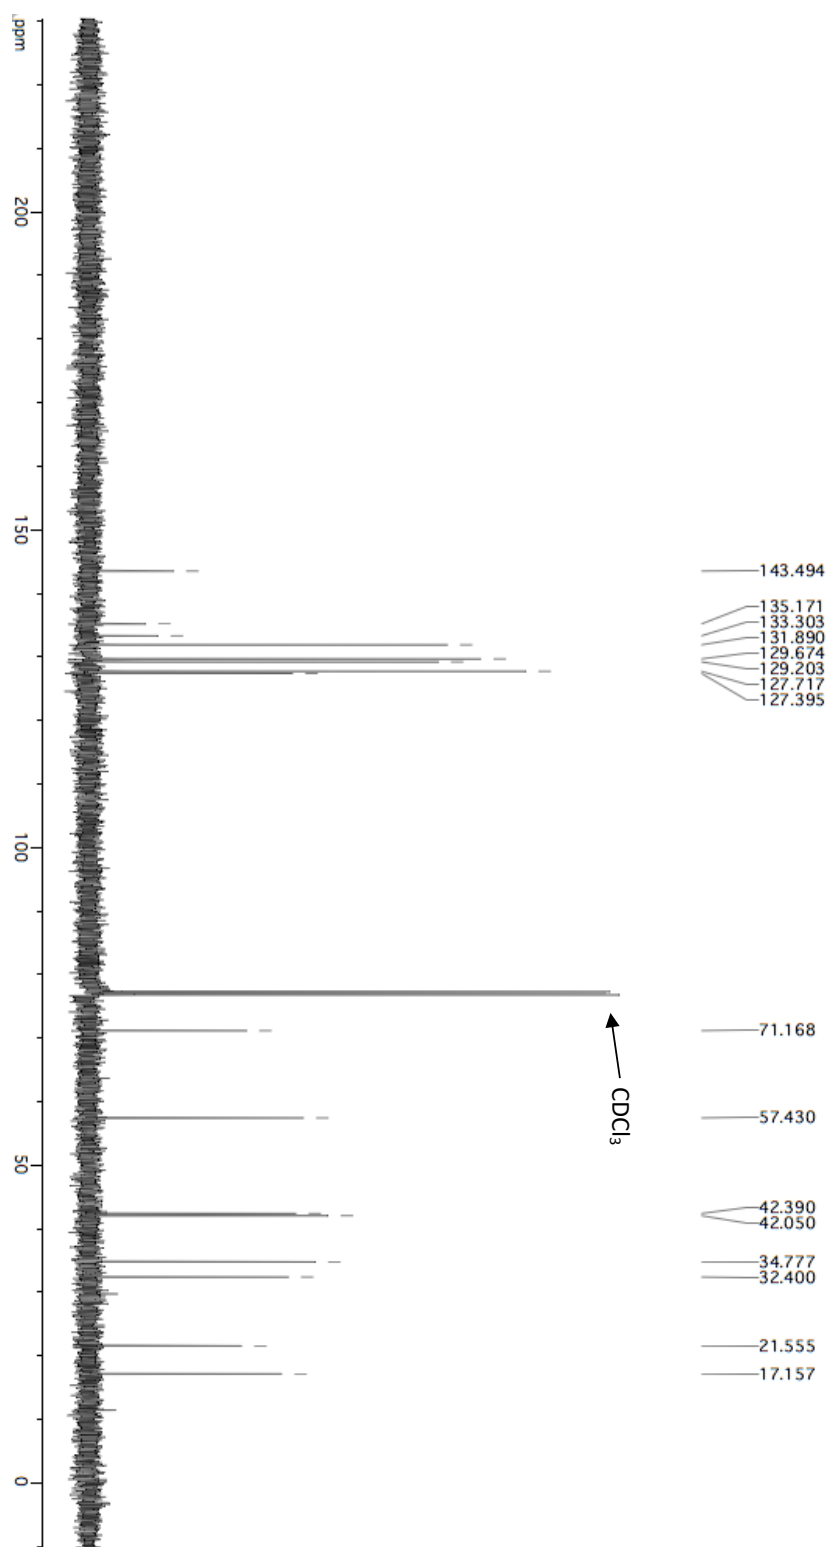

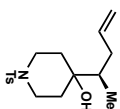

29 ( $^1\text{H}$  NMR, 500 MHz,  $\text{CDCl}_3$ , 25  $^\circ\text{C}$ )

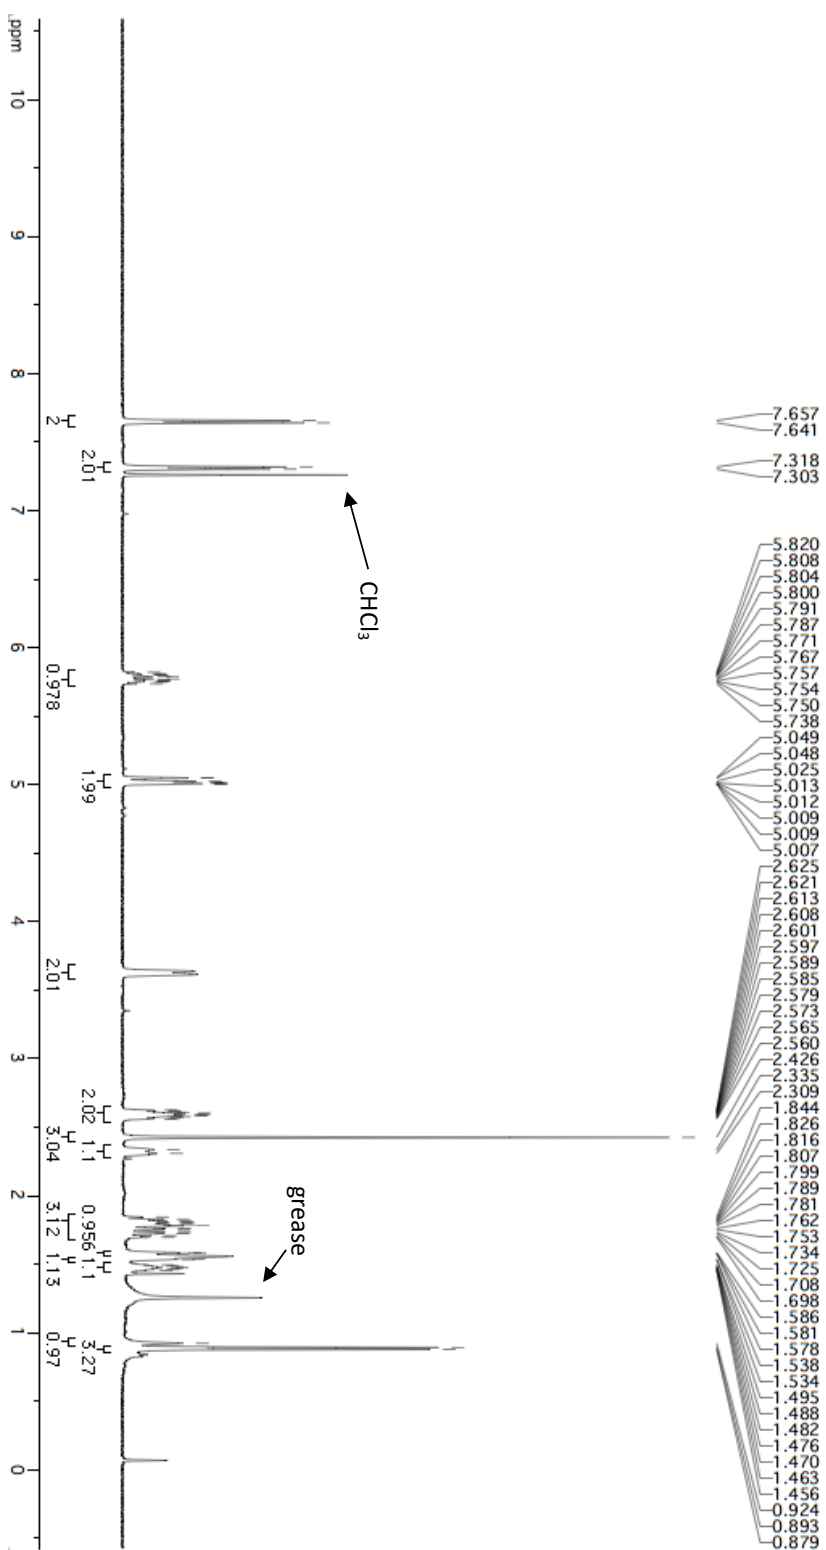



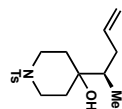

29 ( $^{13}\text{C}$  NMR, 126 MHz,  $\text{CDCl}_3$ , 25  $^\circ\text{C}$ )

143.436  
137.657  
133.286  
129.642  
127.748

116.460

71.264

43.180  
42.173  
42.101  
35.352  
34.242  
33.026

21.546

13.452

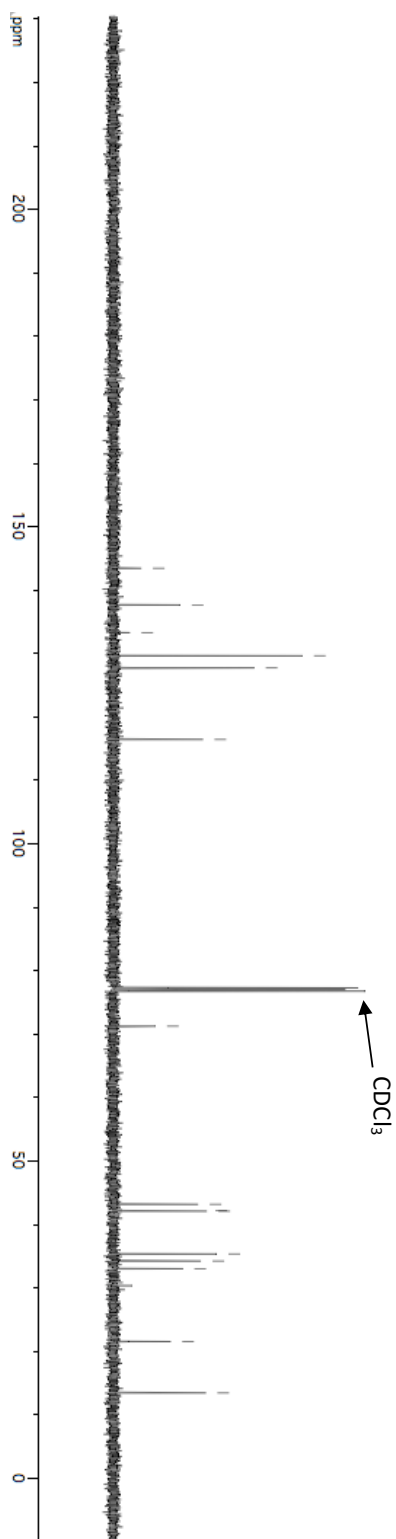

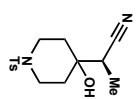

30 ( $^1\text{H}$  NMR, 500 MHz,  $\text{CDCl}_3$ , 25  $^\circ\text{C}$ )

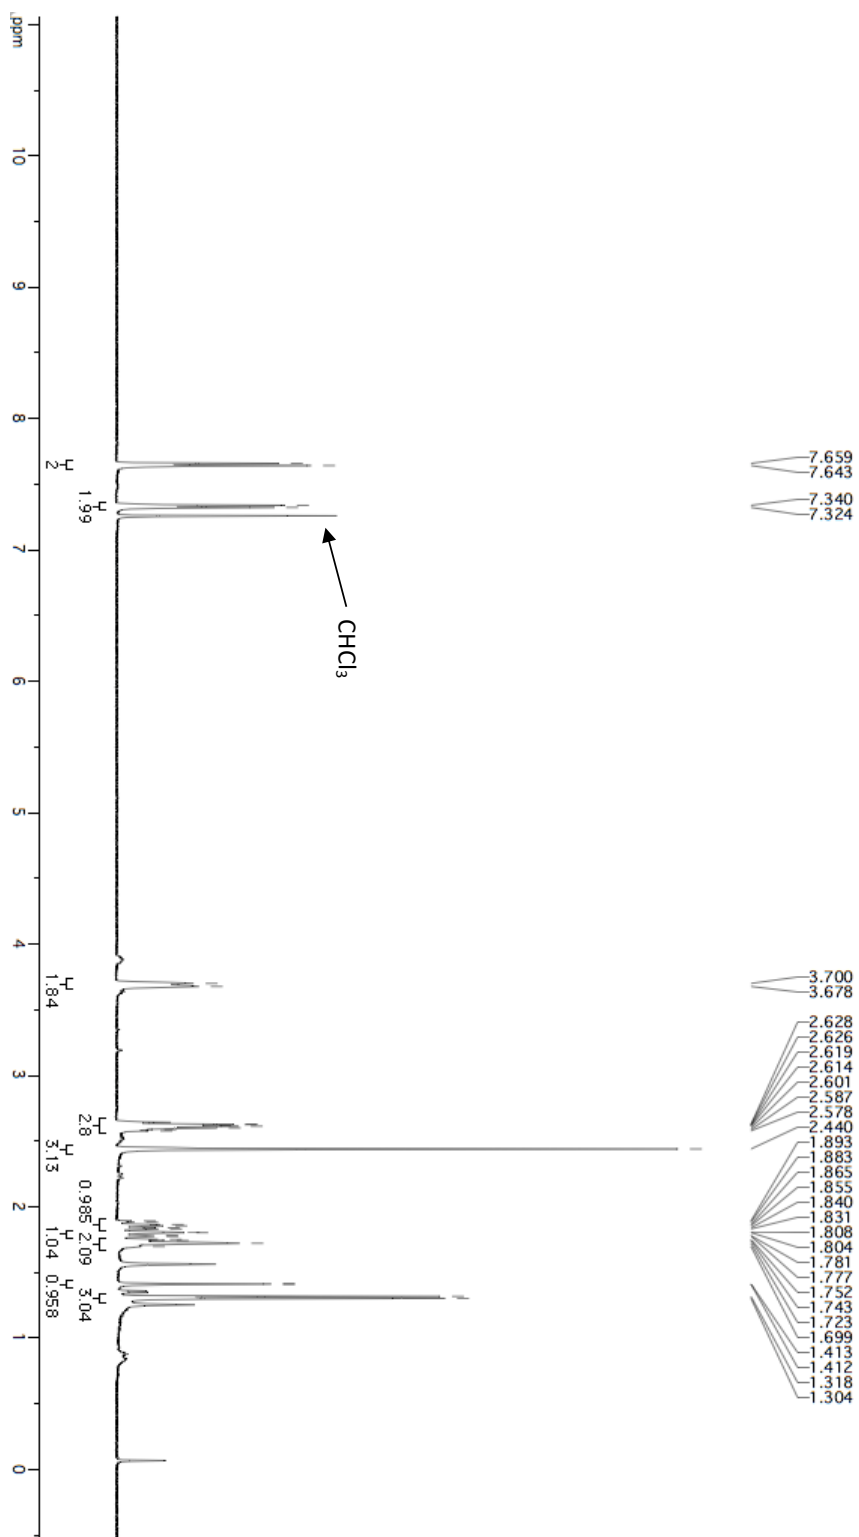

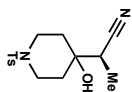

30 ( $^{13}\text{C}$  NMR, 126 MHz,  $\text{CDCl}_3$ , 25  $^\circ\text{C}$ )

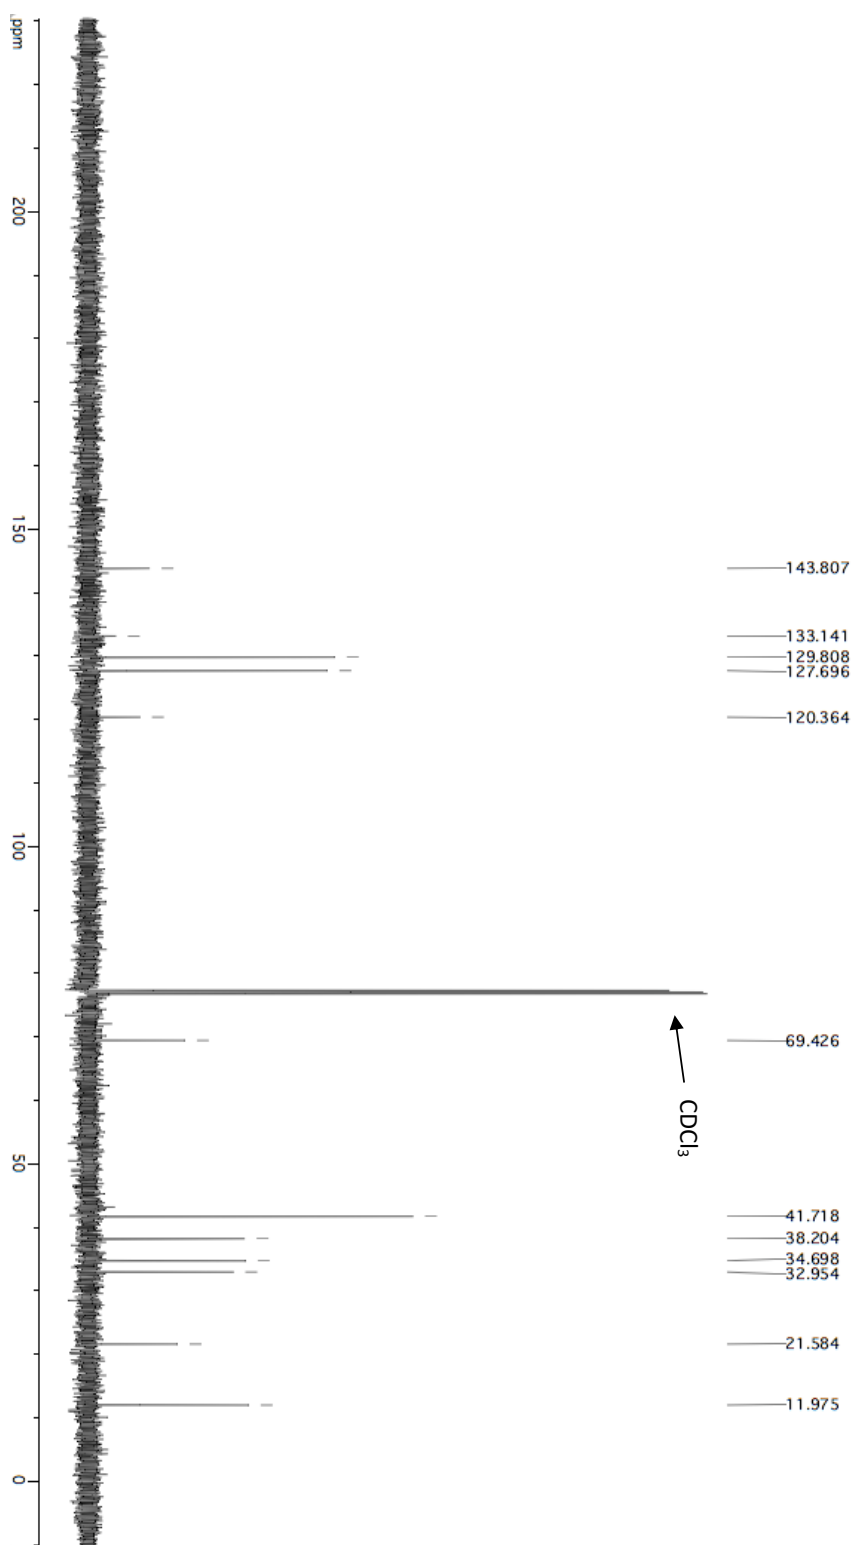

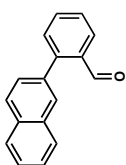

SI-24 (<sup>1</sup>H NMR, 500 MHz, CDCl<sub>3</sub>, 25 °C)

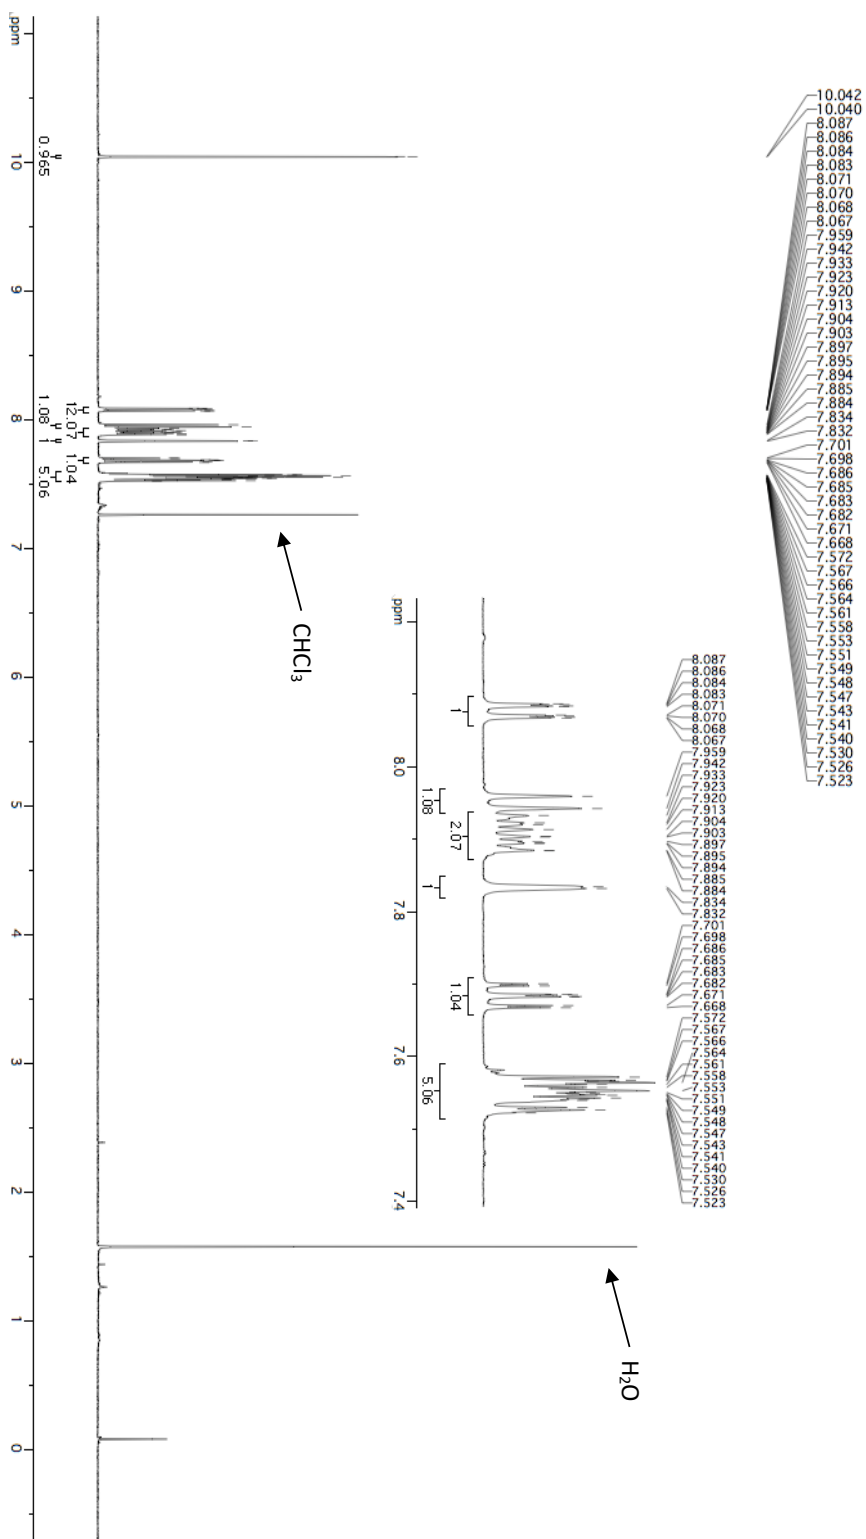

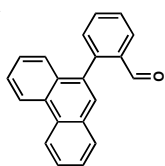

SI.25 (1H NMR, 500 MHz, CDCl<sub>3</sub>, 25 °C)

8.744  
8.742  
8.813  
8.796  
8.772  
8.771  
8.755  
8.755  
8.167  
8.165  
8.164  
8.151  
8.149  
8.149  
7.914  
7.913  
7.911  
7.898  
7.897  
7.896  
7.752  
7.749  
7.747  
7.737  
7.736  
7.734  
7.730  
7.722  
7.719  
7.716  
7.712  
7.706  
7.702  
7.696  
7.690  
7.685  
7.679  
7.677  
7.665  
7.663  
7.661  
7.649  
7.647  
7.643  
7.641  
7.639  
7.626  
7.613  
7.611  
7.608  
7.551  
7.541  
7.540  
7.535  
7.534  
7.532  
7.530  
7.528  
7.520  
7.518  
7.517  
7.514  
7.512

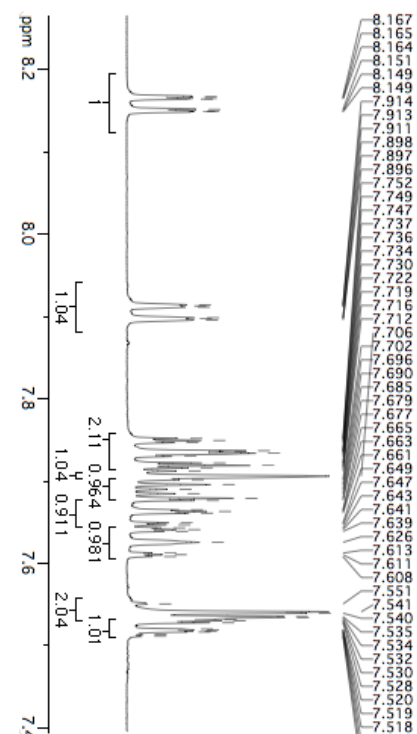

CHCl<sub>3</sub>

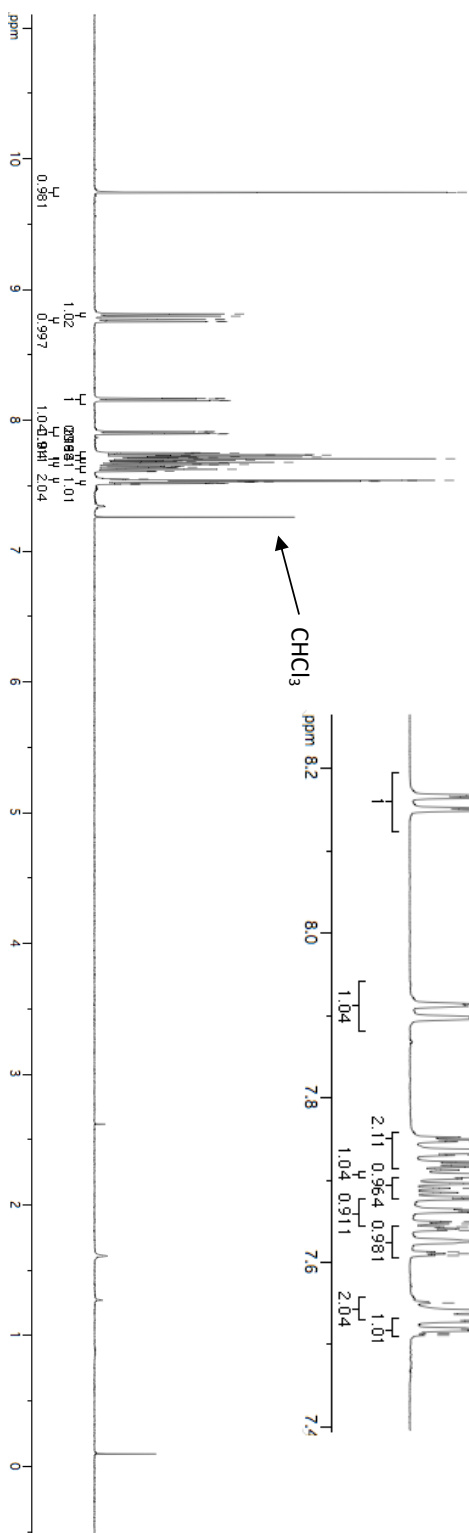

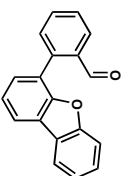

S126 (1H NMR, 500 MHz, CDCl<sub>3</sub>, 25 °C)

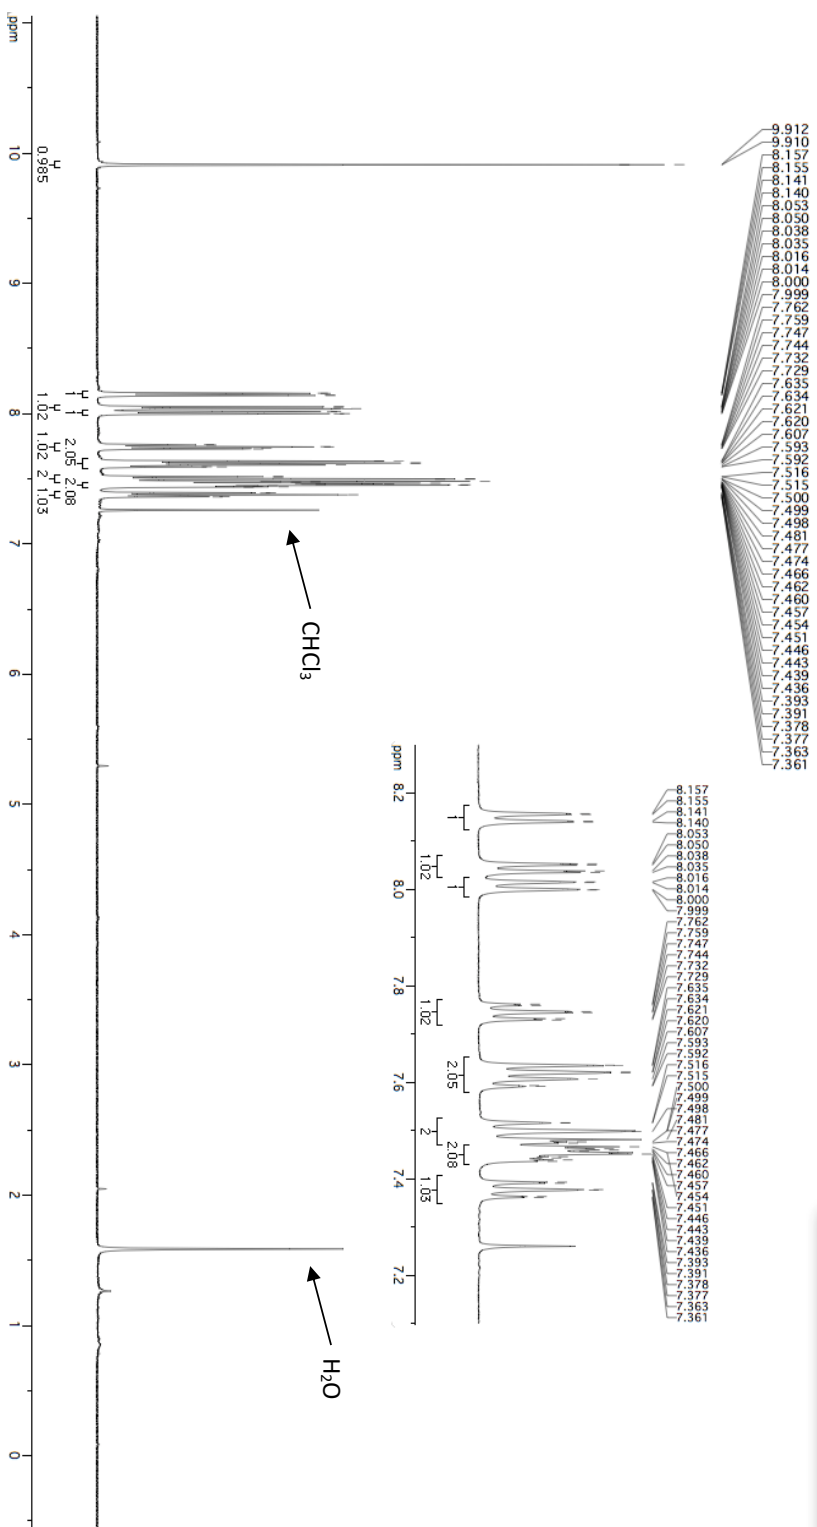

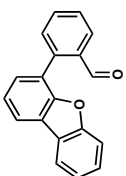

SI.26 ( $^{13}\text{C}$  NMR, 126 MHz,  $\text{CDCl}_3$ , 25  $^\circ\text{C}$ )

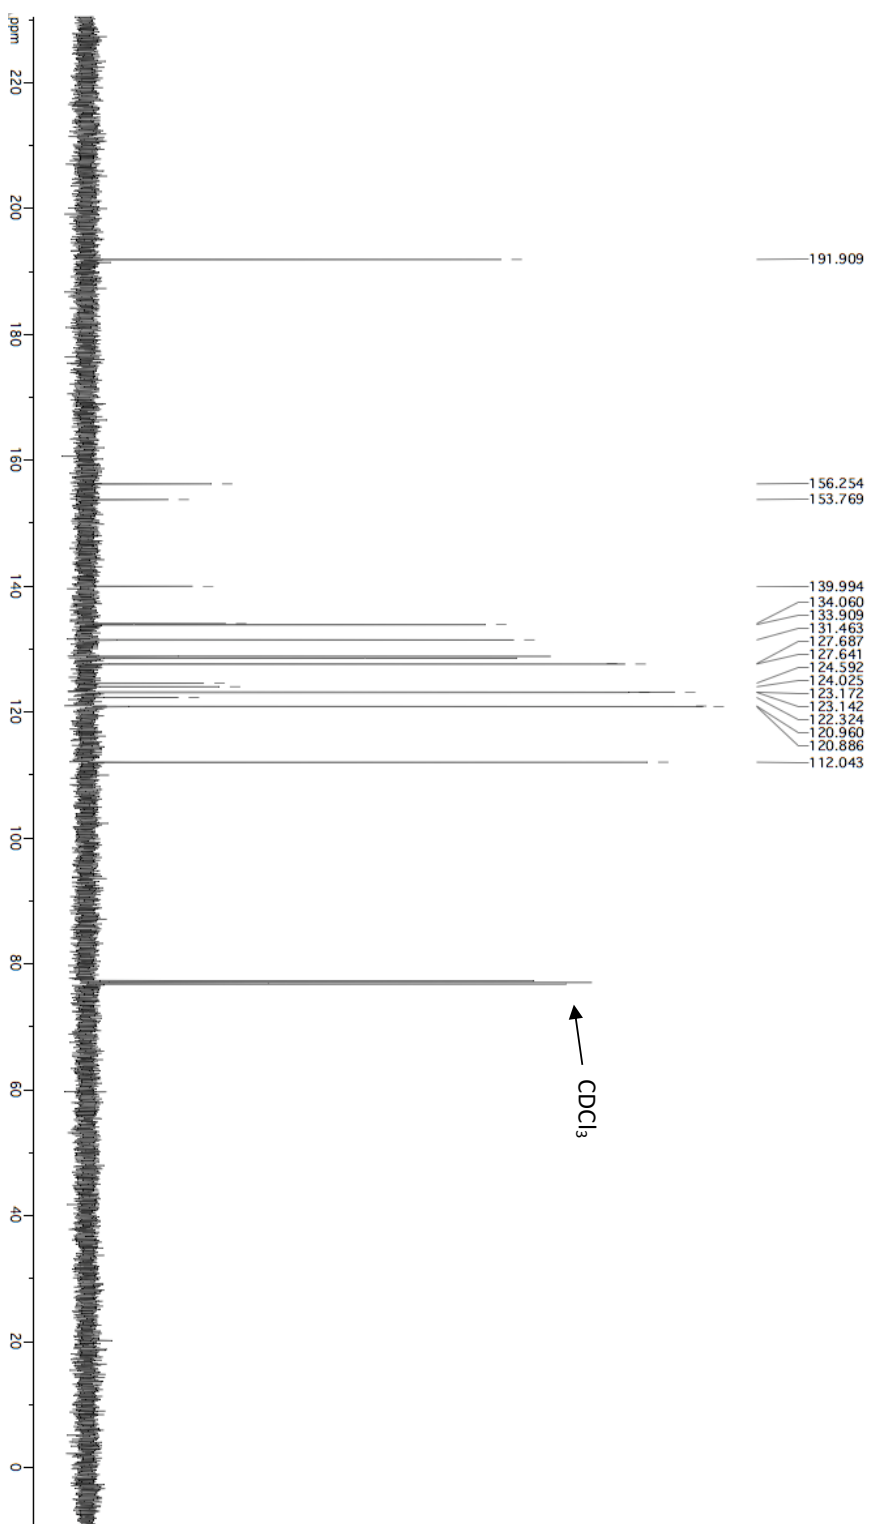

Chiral GC and SFC Traces

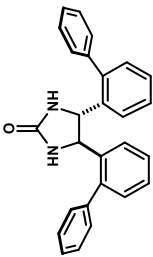

S1-33  
SFC, AD, 30% IPA, CO<sub>2</sub>  
2 mL/min 44°C, 15 uL  
racemic

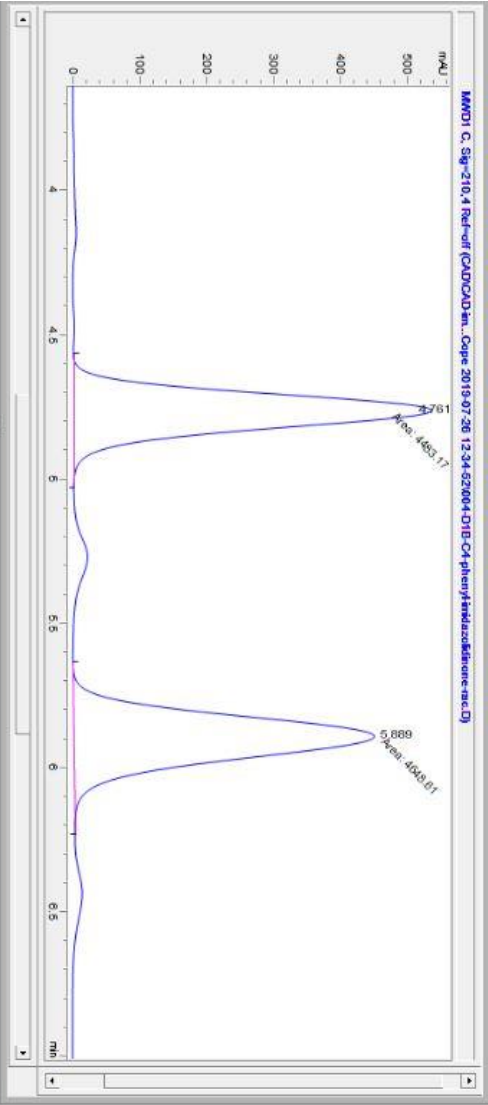

| File Information |                                                |  |  |  |  |  |
|------------------|------------------------------------------------|--|--|--|--|--|
| LC File          | 004-018-C4-phenyl-indazolidinone-rac.D         |  |  |  |  |  |
| File Path        | C:\Chem32\1\Data\CAD\CAD-indazolidinone-dlaza- |  |  |  |  |  |
| Date             | 26-Jul-19, 15:08:12                            |  |  |  |  |  |
| Sample           | phenyl-indazolidinone-rac                      |  |  |  |  |  |
| Sample Info      |                                                |  |  |  |  |  |
| Barcode          |                                                |  |  |  |  |  |
| Operator         | SYSTEM                                         |  |  |  |  |  |
| Method           | CAD 70_30-AD-30-min.M                          |  |  |  |  |  |
| Reference        |                                                |  |  |  |  |  |
| Analyze Time     | 10.093 min                                     |  |  |  |  |  |
| Sampling Rate    | 0.0067 min (0.402 sec), 1515 datapoints        |  |  |  |  |  |

| # | Time  | Type | Area   | Height | Width  | Area%  | Symmetry |
|---|-------|------|--------|--------|--------|--------|----------|
| 1 | 4.761 | NM   | 4483.2 | 536.9  | 0.1392 | 49.094 | 0.905    |
| 2 | 5.889 | NM   | 4648.6 | 450.1  | 0.1721 | 50.906 | 0.897    |



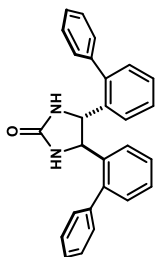

S1-33

SFC, AD, 30% IPA:CO<sub>2</sub>  
2 mL/min 44°C, 15 µL  
enantioenriched  
97% ee

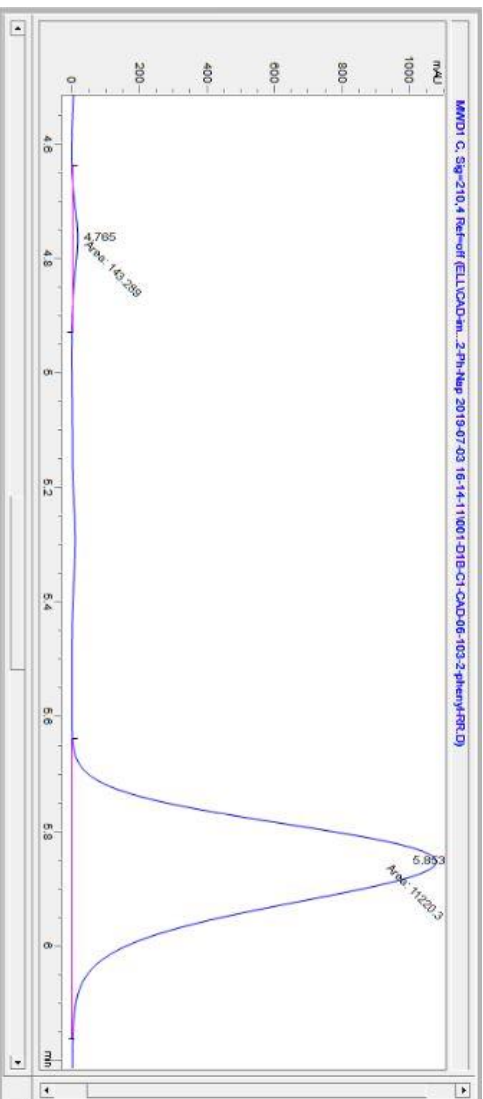

# File Information

|               |                                           |
|---------------|-------------------------------------------|
| LC-File       | 001-D1B-C1-CAD-06-103-2-phenyl-RD         |
| File Path     | C:\Chem321\Data\ELL\CAD-midazolone-2-Ph-N |
| Date          | 03-Jul-19 16:15:06                        |
| Sample        | CAD-06-103-2-phenyl-RD                    |
| Sample Info   |                                           |
| Barcode       |                                           |
| Operator      | SYSTEM                                    |
| Method        | CAD 70_30-AD-10-min.M                     |
| Reference     |                                           |
| Analysis Time | 9.993 min                                 |
| Sampling Rate | 0.0067 min (0.402 sec), 1500 datapoints   |

| # | Time  | Type | Area    | Height | Width  | Area%  | Symmetry |
|---|-------|------|---------|--------|--------|--------|----------|
| 1 | 4.765 | NM   | 143.3   | 17.9   | 0.1335 | 1.261  | 0.875    |
| 2 | 5.853 | NM   | 11220.3 | 1086   | 0.1722 | 98.739 | 0.85     |

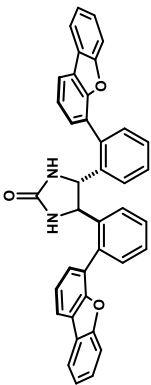

SI-34

SFC, AD, 30% IPA:CO<sub>2</sub>  
2 mL/min 44°C, 15 uL  
racemic

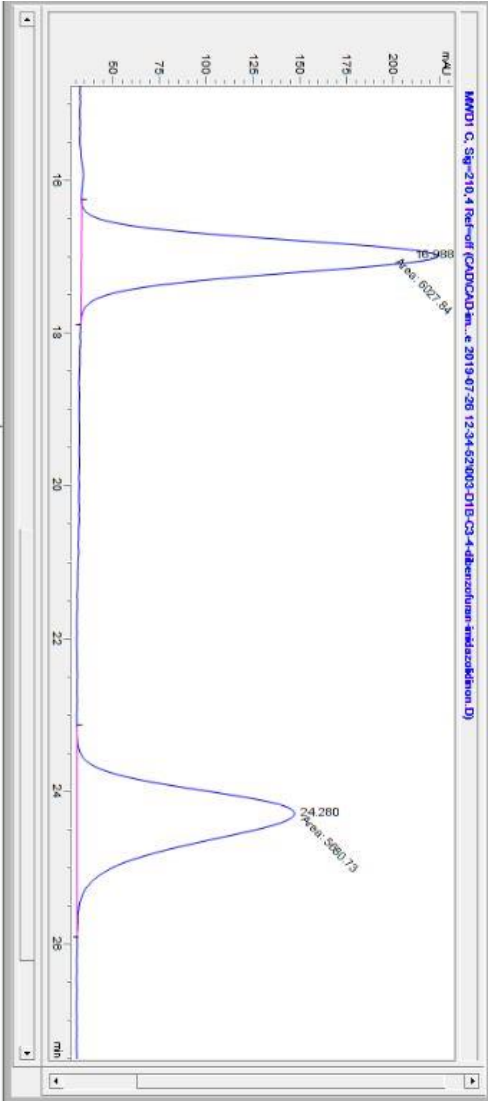

| File Information |                                              |   |        |      |        |
|------------------|----------------------------------------------|---|--------|------|--------|
| LC File          | 003-D1B-C3-4-4benzofuran-indazolidinone.D    | # | Time   | Type | Area   |
| File Path        | C:\Chem32\1\Data\CAD\CAD-midazolhione-dlaza- | 1 | 16.988 | MM   | 6027.8 |
| Date             | 26-Jul-19, 14:37:23                          | 2 | 24.28  | MM   | 5680.7 |
| Sample           | 4-benzofuran-indazolidinone-rac              |   |        |      |        |
| Sample Info      |                                              |   |        |      |        |
| Barcode          |                                              |   |        |      |        |
| Operator         | SYSTEM                                       |   |        |      |        |
| Method           | CAD 70_30-AD-30-min.M                        |   |        |      |        |
| Reference        |                                              |   |        |      |        |
| Analysis Time    | 29.993 min                                   |   |        |      |        |
| Sampling Rate    | 0.0067 min (0.402 sec), 4500 datapoints      |   |        |      |        |

| Area%  | Symmetry |
|--------|----------|
| 51.462 | 0.932    |
| 46.518 | 0.779    |

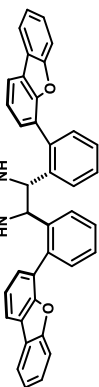

**SI-34**  
 SFC, AD, 30% IPA:CO<sub>2</sub>  
 2 mL/min 44°C, 15 uL  
 enantiomerically  
 96% ee

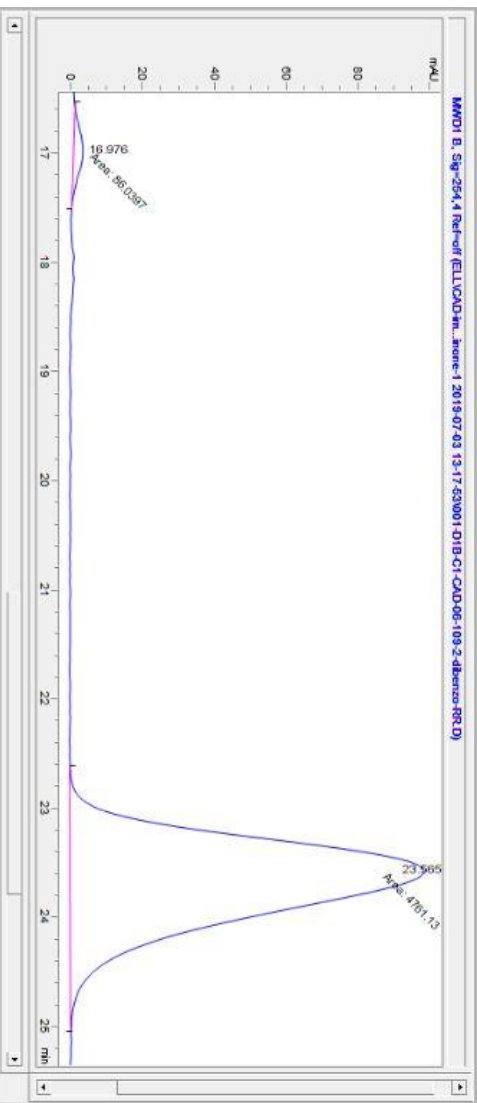

| File Information |                                               |  |  |  |  |  |  |  |  |
|------------------|-----------------------------------------------|--|--|--|--|--|--|--|--|
| LC-File          | 001-018-C1-CAD-06-109-2-dbenzo-R8.D           |  |  |  |  |  |  |  |  |
| File Path        | G:\Chem321\Data\ELU\CAD-mthaloxindione-1.2019 |  |  |  |  |  |  |  |  |
| Date             | 03-Jul-19, 13:18:47                           |  |  |  |  |  |  |  |  |
| Sample           | CAD-06-109-2-dbenzo-R8                        |  |  |  |  |  |  |  |  |
| Sample Info      |                                               |  |  |  |  |  |  |  |  |
| Barcode          |                                               |  |  |  |  |  |  |  |  |
| Operator         | SYSTEM                                        |  |  |  |  |  |  |  |  |
| Method           | CAD 70_30-40-30-min.M                         |  |  |  |  |  |  |  |  |
| Reference        |                                               |  |  |  |  |  |  |  |  |
| Analysis Time    | 23.993 min                                    |  |  |  |  |  |  |  |  |
| Sampling Rate    | 0.0067 min (0.402 sec), 4500 datapoints       |  |  |  |  |  |  |  |  |

  

| # | Time   | Type | Area   | Height | Width  | Area%  | Symmetry |
|---|--------|------|--------|--------|--------|--------|----------|
| 1 | 16.976 | MM   | 86     | 2.8    | 0.5116 | 1.775  | 0.829    |
| 2 | 23.965 | MM   | 4761.1 | 99     | 0.8018 | 98.225 | 0.717    |

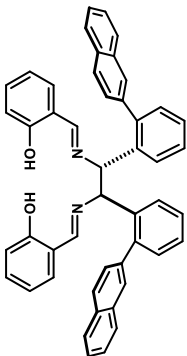

S1-35  
SFC, AD, 20% IPA/CO<sub>2</sub>  
2 mL/min 44°C, 15 uL  
racemic

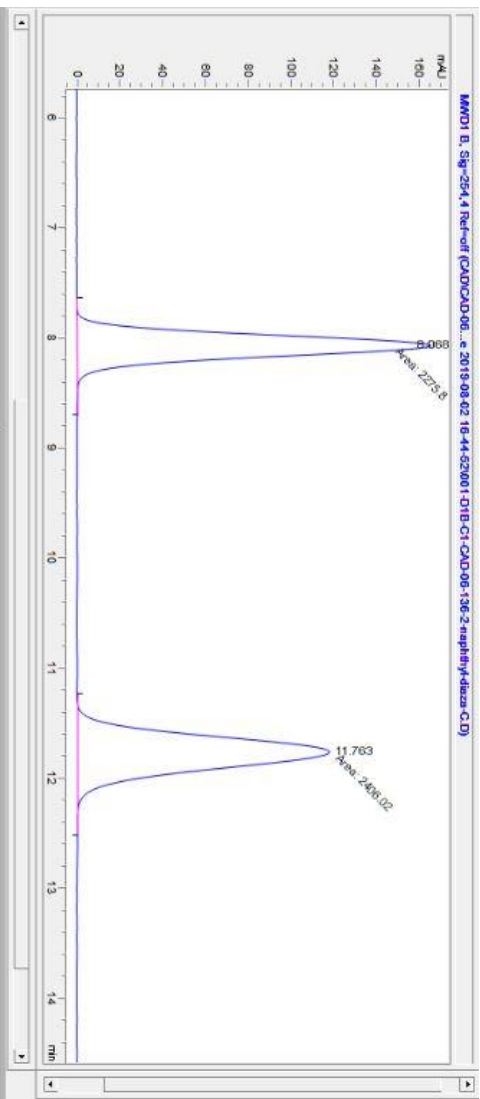

| File Information |                                              |          |       |       |        |
|------------------|----------------------------------------------|----------|-------|-------|--------|
| LC-File          | 001-01B-C1-CAD-06-136-2-naphthyl-daza-C-D    | #        | 1     | Time  | 8.068  |
| File Path        | C:\Chem32\1\Data\CAD\CAD-06-136-2-naphthyl-d |          | 2     | Time  | 11.763 |
| Date             | 02-Aug-19 16:45:46                           | Type     | MM    | Area  | 2275.8 |
| Sample           | CAD-06-136-2-naphthyl-daza-Cope-ee           |          |       | Area  | 2406   |
| Sample Info      |                                              | Height   | 165.6 | Width | 0.2291 |
| Barcode          |                                              |          | 118   | Area% | 48.609 |
| Operator         | SYSTEM                                       | Symmetry |       |       | 0.947  |
| Method           | CAD 80 AD 30min.M                            |          |       |       |        |
| Reference        |                                              |          |       |       |        |
| Analysis Time    | 15.32 min                                    |          |       |       |        |
| Sampling Rate    | 0.0067 mm (0.402 sec), 2374 datapoints       |          |       |       |        |

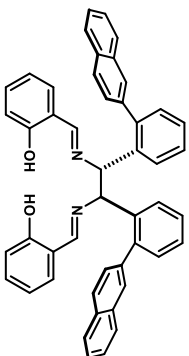

S1,35

SFC, AD, 20% IPA/CO<sub>2</sub>  
2 mL/min 44°C, 15 µL  
enantioenriched  
95% ee

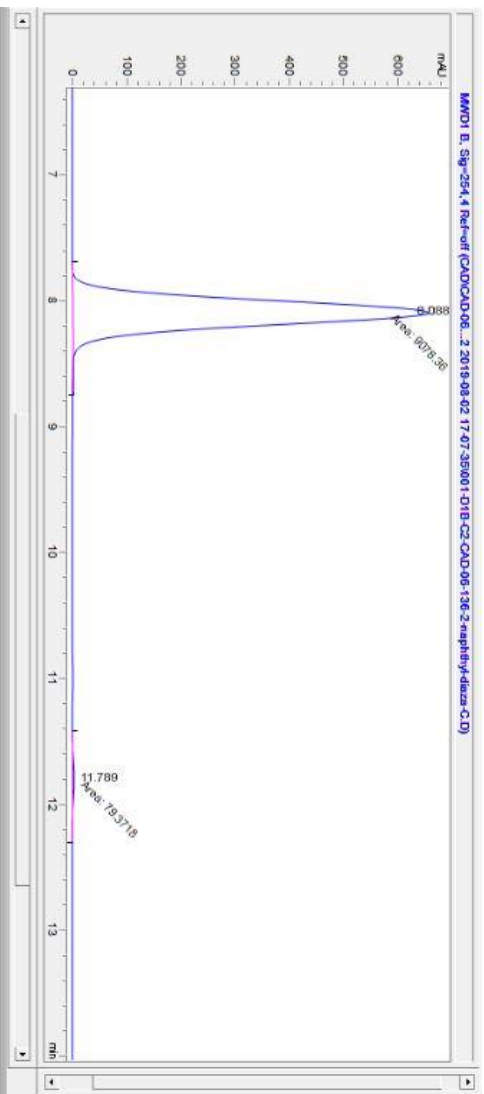

| File Information |                                               | # | Time   | Type | Area   | Height | Width  | Area%  | Symmetry |
|------------------|-----------------------------------------------|---|--------|------|--------|--------|--------|--------|----------|
| LC-File          | 001-D1B-C2-CAD-06-136-2-naphthyl-dl-a-C-D     | 1 | 8.088  | NM   | 9078.4 | 660.9  | 0.2289 | 99.133 | 0.988    |
| File Path        | C:\Chem32\10Data\CAD\CAD-06-136-2-naphthyl-dl | 2 | 11.789 | NM   | 79.4   | 3.7    | 0.3553 | 0.867  | 0.892    |
| Date             | 02-Aug-19, 17:08:29                           |   |        |      |        |        |        |        |          |
| Sample           | CAD-06-136-2-naphthyl-dl-a-Cope-ee-2          |   |        |      |        |        |        |        |          |
| Sample Info      |                                               |   |        |      |        |        |        |        |          |
| Barcode          |                                               |   |        |      |        |        |        |        |          |
| Operator         | SYSTEM                                        |   |        |      |        |        |        |        |          |
| Method           | CAD 80_20 AD_30min.M                          |   |        |      |        |        |        |        |          |
| Reference        |                                               |   |        |      |        |        |        |        |          |
| Analysis Time    | 16.66 min                                     |   |        |      |        |        |        |        |          |
| Sampling Rate    | 0.0067 mm (0.402 sec), 2500 datapoints        |   |        |      |        |        |        |        |          |

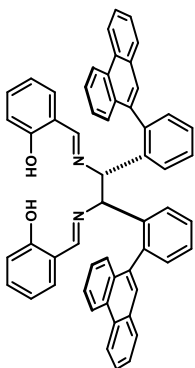

SFC, AD, 20% IPA:CO<sub>2</sub>  
2 mL/min 44°C, 15 uL  
racemic

S1.36

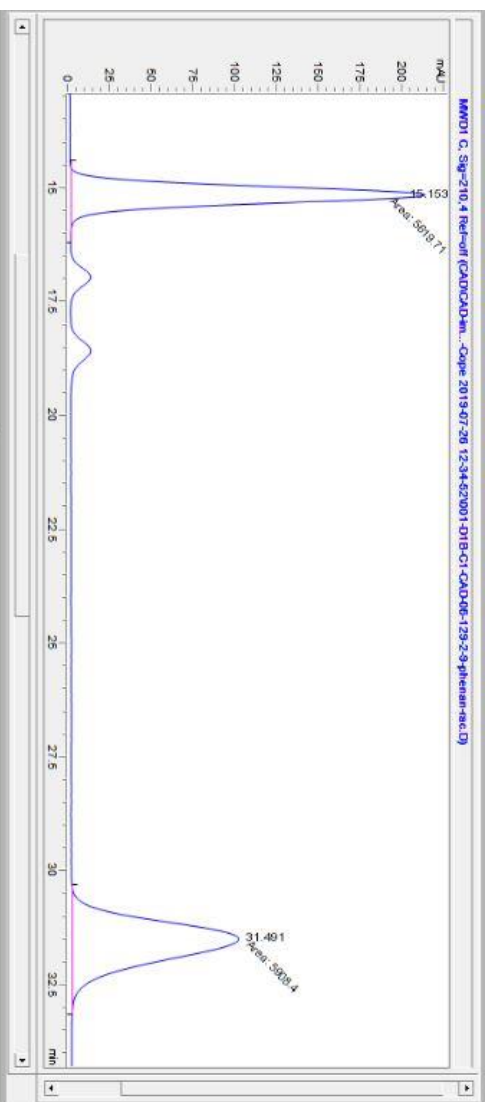

| File Information |                                           |
|------------------|-------------------------------------------|
| LC-File          | 001-015-C1-CAD-Q6-129-2-9-phenan-rac.D    |
| File path        | C:\Chem321\Data\CAD\CAD-midazolone-dlaza- |
| Date             | 26-Jul-19, 12:35:48                       |
| Sample           | CAD-Q6-129-2-9-phenan-rac                 |
| Sample Info      |                                           |
| Barcode          |                                           |
| Operator         | SYSTEM                                    |
| Method           | CAD 80_20_AD_50min.M                      |
| Reference        |                                           |
| Analysis Time    | 59.993 min                                |
| Sampling Rate    | 0.0067 min (0.402 sec), 9000 datapoints   |

| # | Time   | Type | Area   | Height | Width  | Area%  | Symmetry |
|---|--------|------|--------|--------|--------|--------|----------|
| 1 | 15.153 | MM   | 5619.7 | 213.6  | 0.4384 | 48.748 | 0.988    |
| 2 | 31.491 | MM   | 5908.4 | 100.3  | 0.5816 | 51.252 | 0.794    |

S130

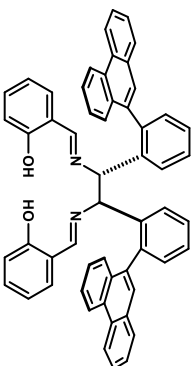

S1-36  
SFC, AD, 20% IPA:CO<sub>2</sub>  
2 mL/min 44°C, 15 uL  
enantioenriched  
99% ee

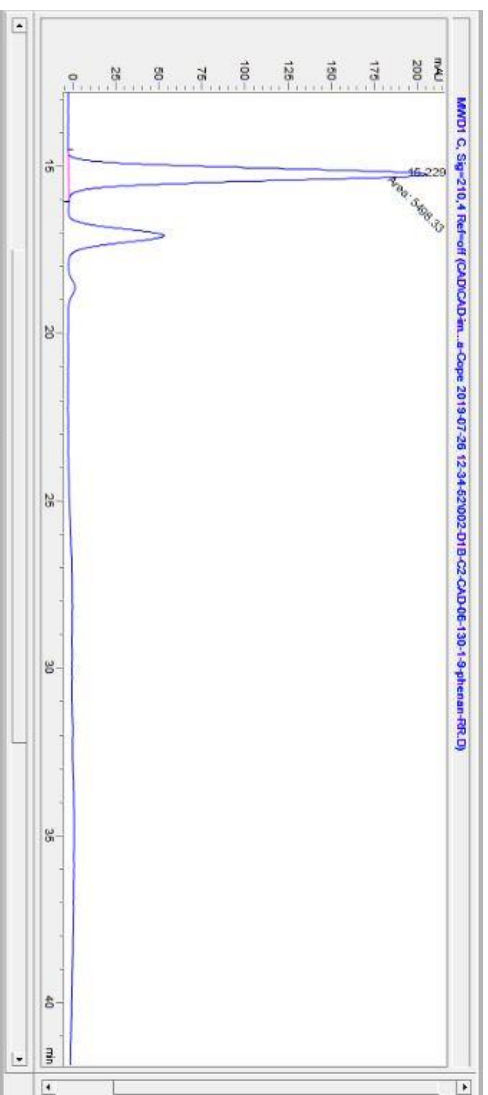

| File Information |                                              |  |  |  |  |  |  |
|------------------|----------------------------------------------|--|--|--|--|--|--|
| LC-File          | 002-2018-C2-CAD-06-130-1-9-phenan-RR-D       |  |  |  |  |  |  |
| File Path        | C:\Chem32\1\Data\CAD\CAD-midarololone-diaza- |  |  |  |  |  |  |
| Date             | 26-Jul-19, 13:36:34                          |  |  |  |  |  |  |
| Sample           | CAD-06-130-1-9-phenan-RR                     |  |  |  |  |  |  |
| Sample Info      |                                              |  |  |  |  |  |  |
| Barcode          |                                              |  |  |  |  |  |  |
| Operator         | SYSTEM                                       |  |  |  |  |  |  |
| Method           | CAD 80_20_AD_60min.M                         |  |  |  |  |  |  |
| Reference        |                                              |  |  |  |  |  |  |
| Analyze Time     | 59.993 min                                   |  |  |  |  |  |  |
| Sampling Rate    | 0.0067 min (0.402 sec), 9000 datapoints      |  |  |  |  |  |  |

| # | Time   | Type | Area   | Height | Width  | Area%   | Symmetry |
|---|--------|------|--------|--------|--------|---------|----------|
| 1 | 15.229 | NM   | 5498.3 | 208.9  | 0.4386 | 100.000 | 0.993    |

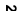

**cemic**

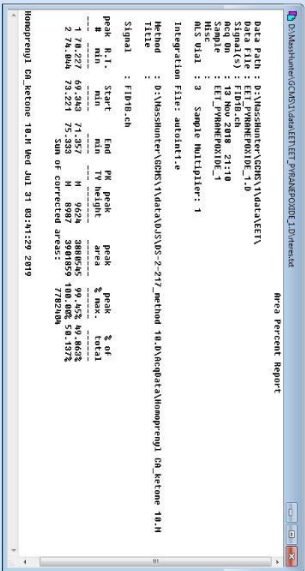



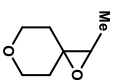

chiral GC/FID  
80 °C, 75 min  
enantiomeriched  
95% ee

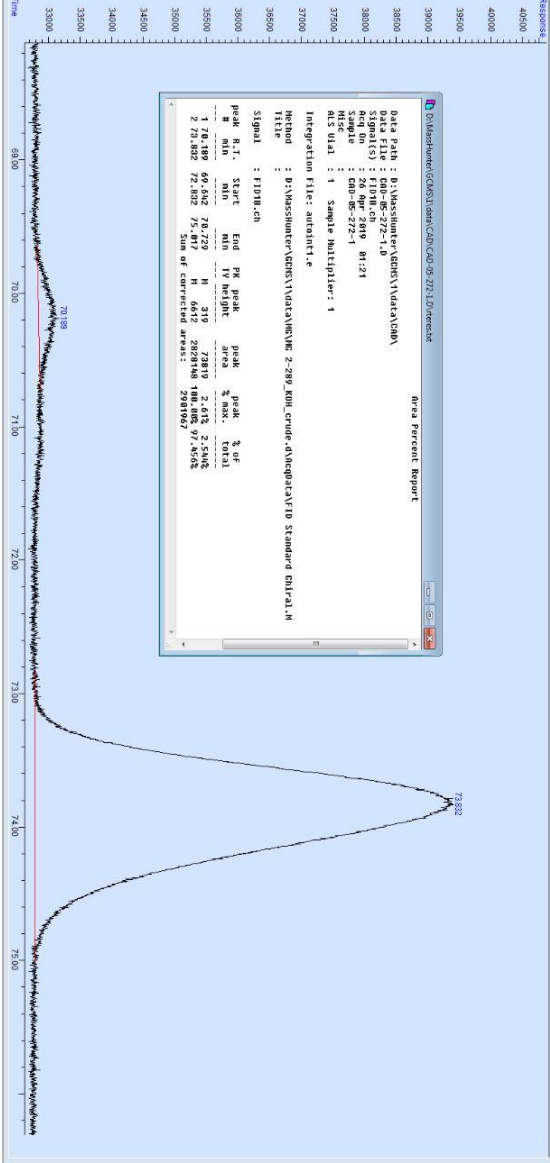

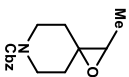

9

SFC, OD-H, 5% IPA,CO<sub>2</sub>  
2 mL/min, 44C, 15 uL  
racemic

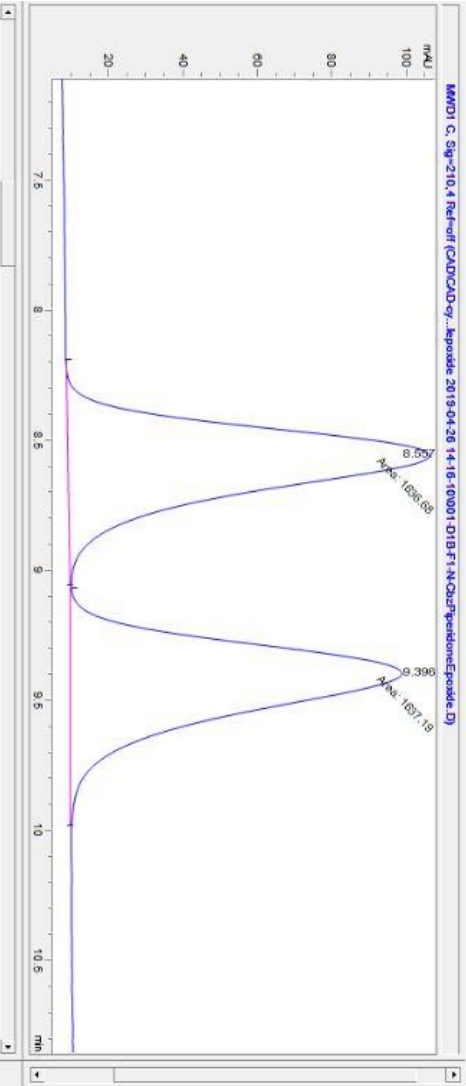

| File Information |                                          |  |  |  |  |  |  |  |  |
|------------------|------------------------------------------|--|--|--|--|--|--|--|--|
| LC-File          | 001-D18-F1-N-CbzperdoneEpoxide.D         |  |  |  |  |  |  |  |  |
| File Path        | C:\Chem321\1Data\CAD\CAD-cydhexylepoxide |  |  |  |  |  |  |  |  |
| Date             | 26-Apr-19, 14:17:04                      |  |  |  |  |  |  |  |  |
| Sample           | N-CbzperdoneEpoxide                      |  |  |  |  |  |  |  |  |
| Sample Info      |                                          |  |  |  |  |  |  |  |  |
| Barcode          |                                          |  |  |  |  |  |  |  |  |
| Operator         | SYSTEM                                   |  |  |  |  |  |  |  |  |
| Method           | CAD-cydhexylepoxide.M                    |  |  |  |  |  |  |  |  |
| Reference        |                                          |  |  |  |  |  |  |  |  |
| Analysis Time    | 44.993 min                               |  |  |  |  |  |  |  |  |
| Sampling Rate    | 0.0067 min (0.402 sec), 6750 datapoints  |  |  |  |  |  |  |  |  |

| # | Time  | Type | Area   | Height | Width  | Area%  | Symmetry |
|---|-------|------|--------|--------|--------|--------|----------|
| 1 | 8.557 | MM   | 1636.7 | 97.9   | 0.2785 | 49.992 | 0.758    |
| 2 | 9.396 | MM   | 1637.2 | 89.7   | 0.3041 | 50.008 | 0.728    |

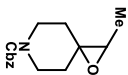

SFC, OD-H, 5% IPA:CO<sub>2</sub>  
 2 mL/min, 44°C, 15 uL  
 enantioenriched  
 89% ee

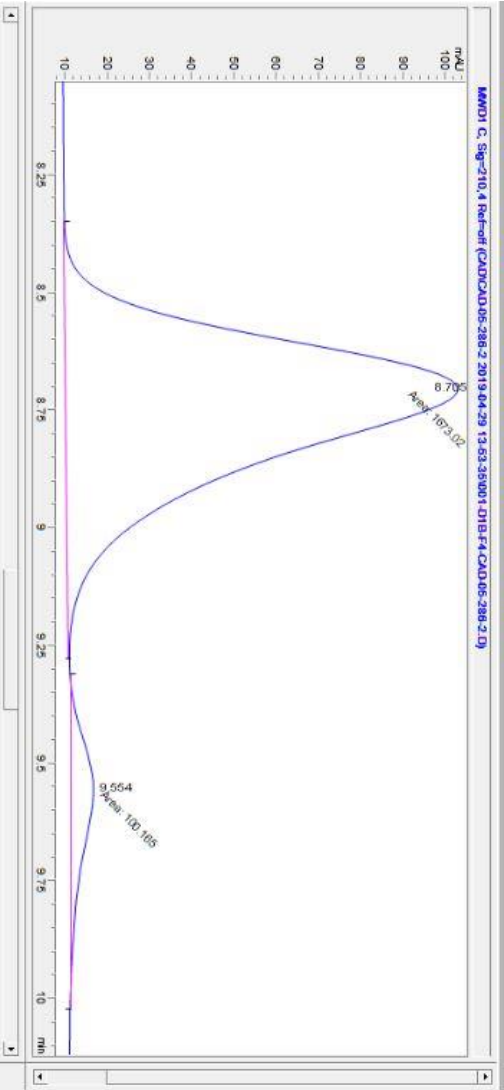

| File Information |                                          |  |  |  |  |
|------------------|------------------------------------------|--|--|--|--|
| LC-File          | 001-01B-F4-CAD-05-286-2.D                |  |  |  |  |
| File Path        | C:\Chem221\Data\CAD\CAD-05-286-2 2019-04 |  |  |  |  |
| Date             | 29-Apr-19, 13:54:44                      |  |  |  |  |
| Sample           | CAD-05-286-2                             |  |  |  |  |
| Sample Info      |                                          |  |  |  |  |
| Barcode          |                                          |  |  |  |  |
| Operator         | SYSTEM                                   |  |  |  |  |
| Method           | CAD MCDz Cyclohexyl epoxide.M            |  |  |  |  |
| Reference        |                                          |  |  |  |  |
| Analytes Time    | 14.993 min                               |  |  |  |  |
| Sampling Rate    | 0.0067 min (0.402 sec), 2250 datapoints  |  |  |  |  |

| # | Time  | Type | Area  | Height | Width  | Area%  | Symmetry |
|---|-------|------|-------|--------|--------|--------|----------|
| 1 | 8.705 | MM   | 1673  | 92.9   | 0.3    | 94.351 | 0.687    |
| 2 | 9.554 | MM   | 100.2 | 5.6    | 0.2997 | 5.649  | 0.652    |

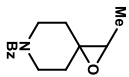

10

SFC, O<sub>2</sub>H, 1% iPrCO<sub>2</sub>  
2 mL/min, 44°C, 15 uL  
racemic

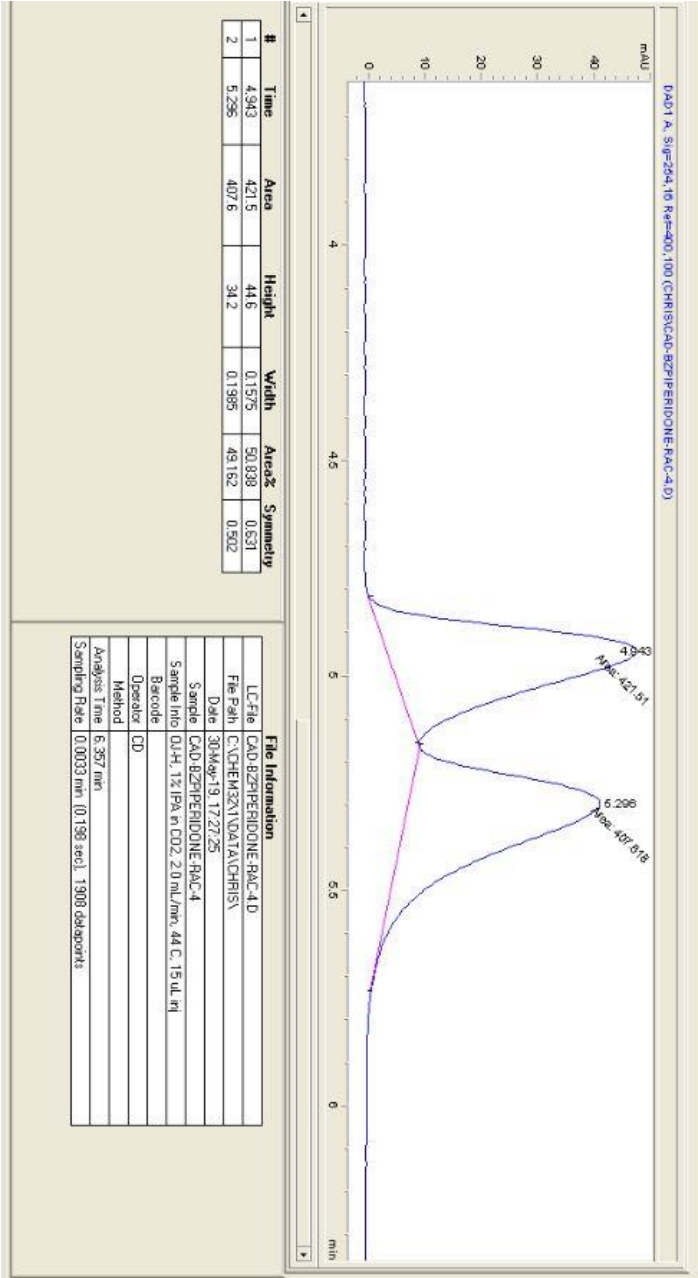

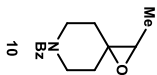

SFC, O<sub>2</sub>H, 1% IPA/CO<sub>2</sub>  
 2 mL/min, 44°C, 15 uL  
 enantioenriched  
 87% ee

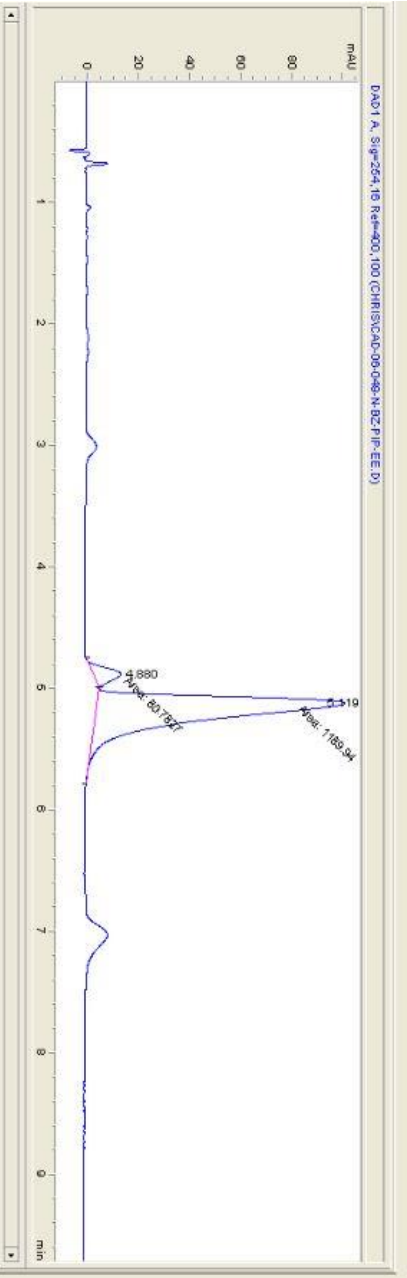

| # | Time  | Area   | Height | Width  | Area%  | Symmetry |
|---|-------|--------|--------|--------|--------|----------|
| 1 | 4.88  | 80.8   | 11.1   | 0.1208 | 6.367  | 1.058    |
| 2 | 5.119 | 1189.9 | 97.7   | 0.2037 | 93.643 | 0.393    |

| File Information |                                                                           |
|------------------|---------------------------------------------------------------------------|
| LC-File          | CAD-06-049-NBz-PIP-EE.D                                                   |
| File Path        | C:\CHEM\231\DATA\CHHIS\                                                   |
| Date             | 09-Jun-19, 18:51:42                                                       |
| Sample           | CAD-06-049-NBz-06-ee                                                      |
| Sample Info      | O <sub>2</sub> H, 1% IPA in CO <sub>2</sub> , 2.0 mL/min, 44°C, 15 uL inj |
| Barcode          |                                                                           |
| Operator         | CHHIS                                                                     |
| Method           |                                                                           |
| Analysis Time    | 9.713 min                                                                 |
| Sampling Rate    | 0.0033 min (0.198 sec), 2915 datapoints                                   |

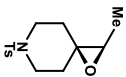

11

SFC, AD, 20% IPA/CO<sub>2</sub>  
2 mL/min 44°C, 15 uL  
racemic

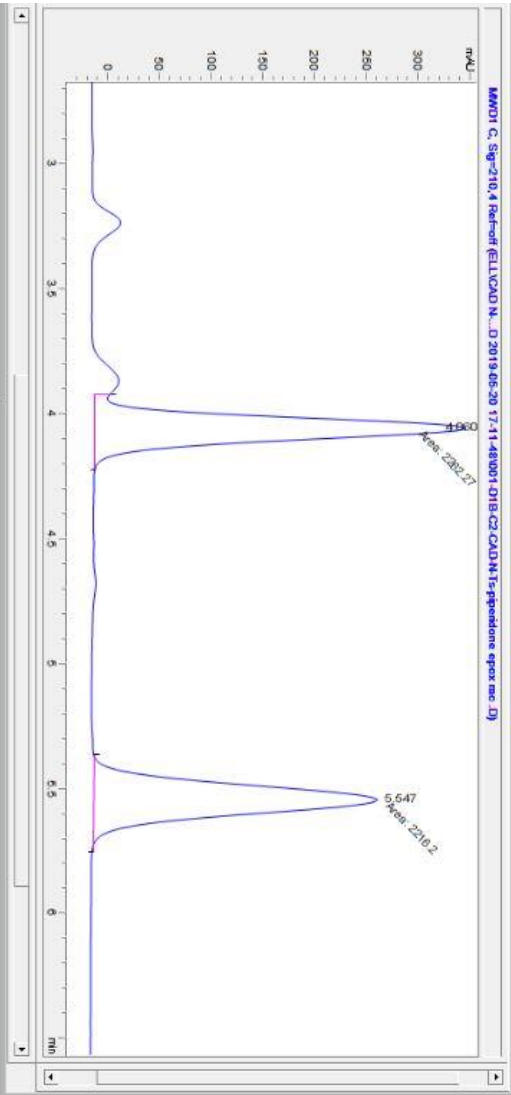

| File Information |                                              |
|------------------|----------------------------------------------|
| LC-File          | 001-01B-C2-CAD-N-Ts-piperidine epox rac. D   |
| File Path        | C:\Open321\Data\ELU\CAD N-Ts-piperidine epox |
| Date             | 20-May-19, 17:12:42                          |
| Sample           | CAD-N-Ts-piperidine epox rac. 80_20 AD-2     |
| Sample Info      |                                              |
| Barcode          |                                              |
| Operator         | SYSTEM                                       |
| Method           | CAD 80_20 AD. M                              |
| Reference        |                                              |
| Analysis Time    | 7.74 min                                     |
| Sampling Rate    | 0.0067 min (0.402 sec), 1162 datapoints      |

| # | Time  | Type | Area   | Height | Width  | Area%  | Symmetry |
|---|-------|------|--------|--------|--------|--------|----------|
| 1 | 4.06  | MM   | 2262.3 | 362.1  | 0.1041 | 50.514 | 0.92     |
| 2 | 5.547 | MM   | 2216.2 | 276.6  | 0.1335 | 49.486 | 1.028    |

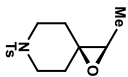

11

SFC AD 20% IPA/CO<sub>2</sub>  
2 mL/min 44C, 15 uL  
enantioenriched  
95% ee

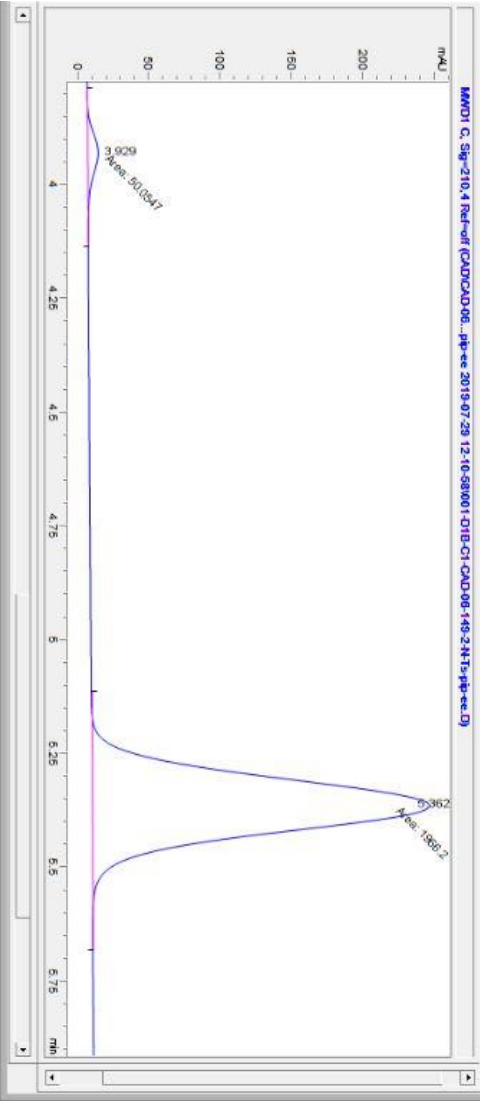

| File Information |                                             |  |  |  |  |  |
|------------------|---------------------------------------------|--|--|--|--|--|
| LC File          | 001-01B-C1-CAD-06-149-2-N-Ts-PD-ee.D        |  |  |  |  |  |
| File Path        | C:\Chem321\Data\CAD\CAD-06-149-2-N-Ts-PD-ee |  |  |  |  |  |
| Date             | 29-Jul-19, 12:11:52                         |  |  |  |  |  |
| Sample           | CAD-06-149-2-N-Ts-PD-ee                     |  |  |  |  |  |
| Sample Info      |                                             |  |  |  |  |  |
| Barcode          |                                             |  |  |  |  |  |
| Operator         | SYSTEM                                      |  |  |  |  |  |
| Method           | CAD 80_20 AD.M                              |  |  |  |  |  |

| # | Time  | Type | Area   | Height | Width  | Area%  | Symmetry |
|---|-------|------|--------|--------|--------|--------|----------|
| 1 | 3.929 | NM   | 50.1   | 7.5    | 0.1116 | 2.483  | 0.866    |
| 2 | 5.362 | NM   | 1966.2 | 236.9  | 0.1363 | 97.517 | 1.031    |

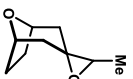

chiral GC/FID  
105 °C, 120 min  
racemic

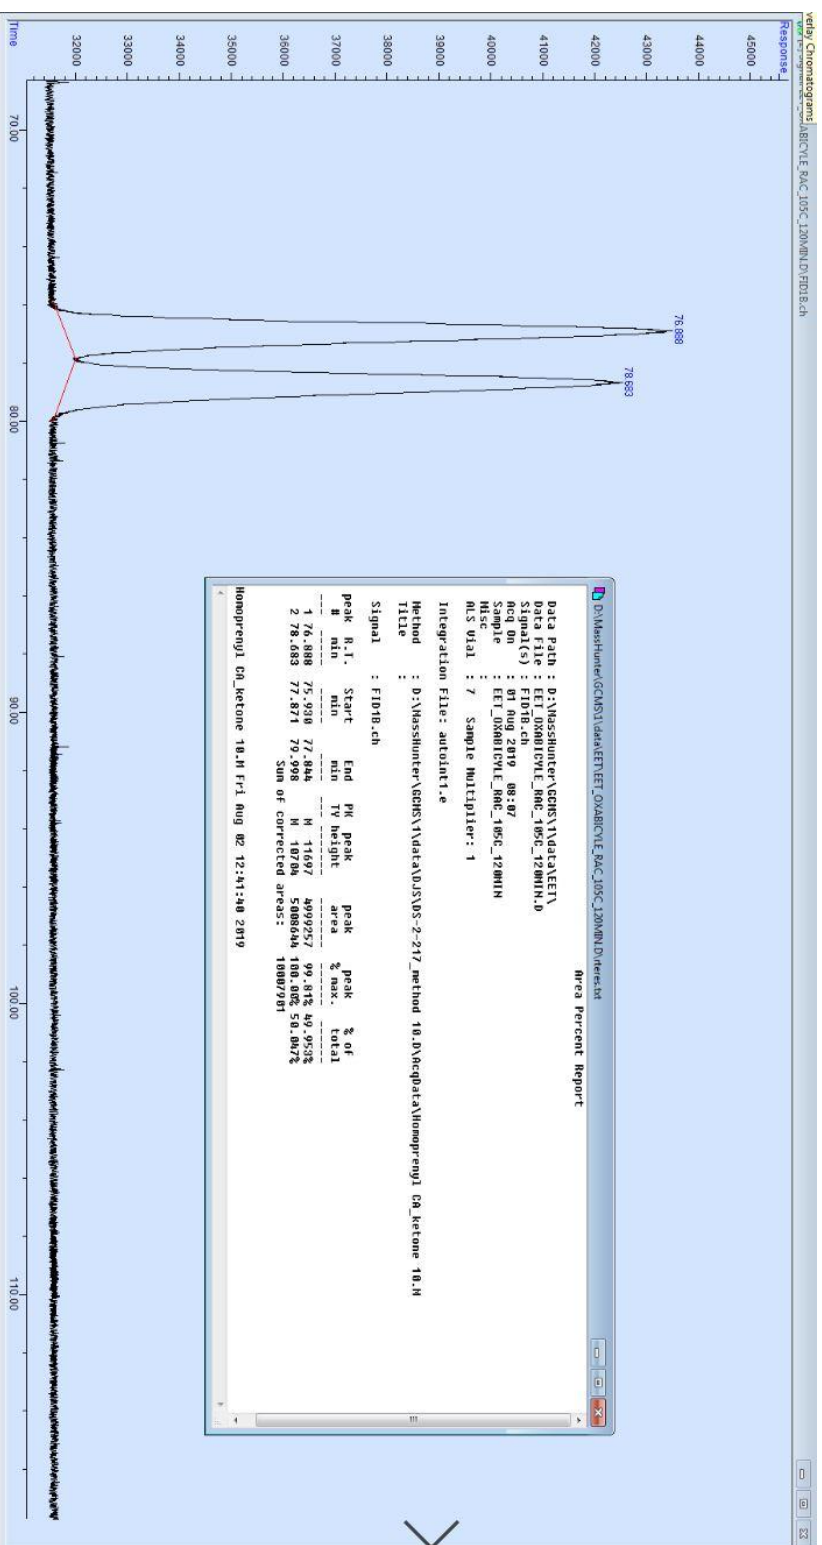



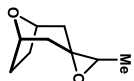

12

chiral GC/FID  
105 °C, 120 min  
enantiomerized  
93% ee

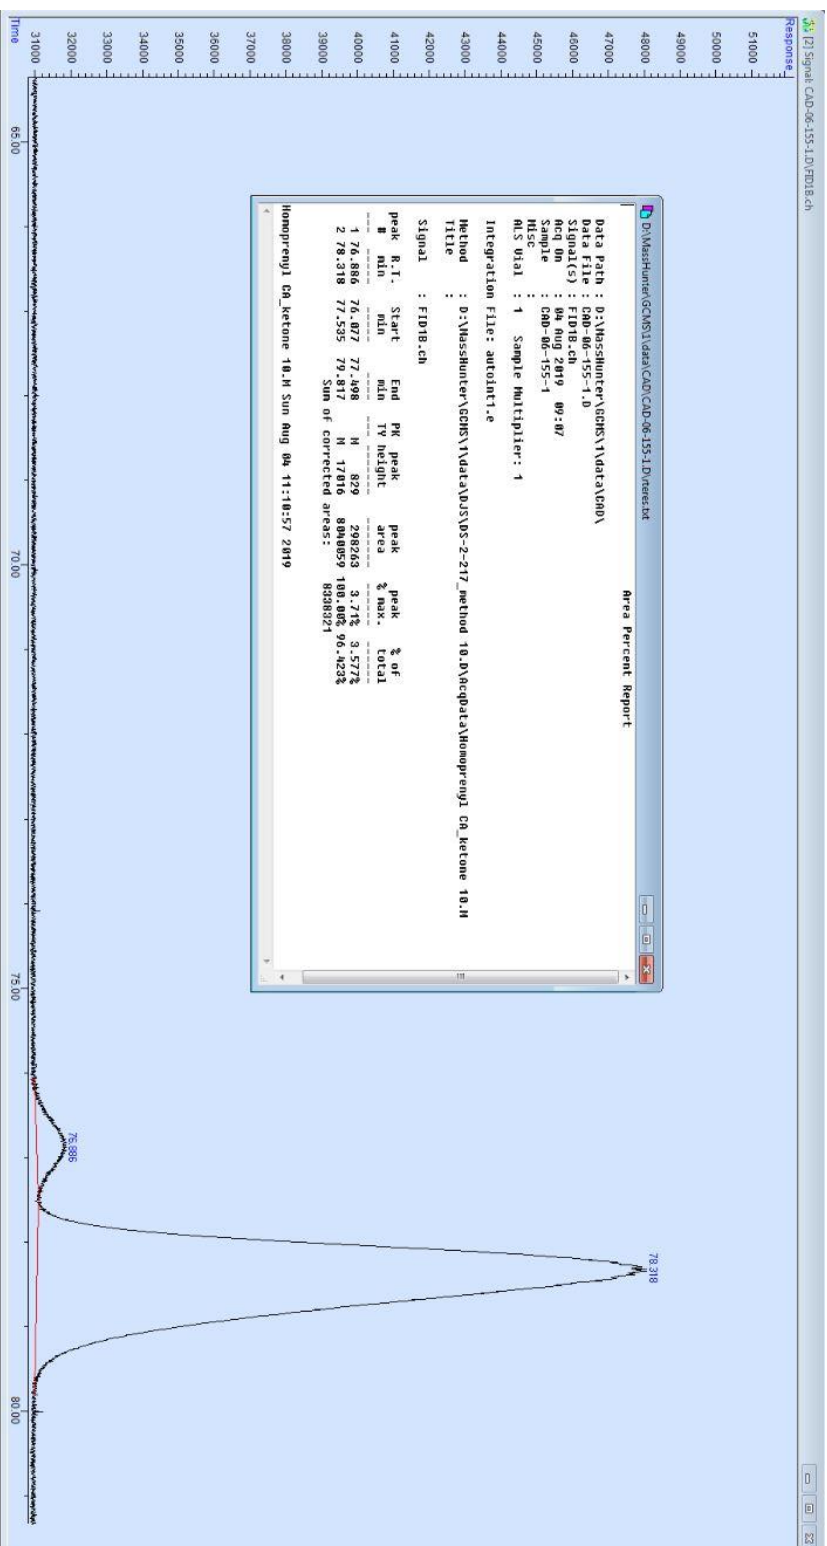

S141

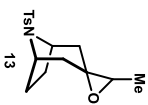

SFC,  $\text{O}_2/\text{H}$ , 5%  $\text{IPAC}/\text{CO}_2$   
 2 mL/min, 44°C, 15 uL  
 racemic

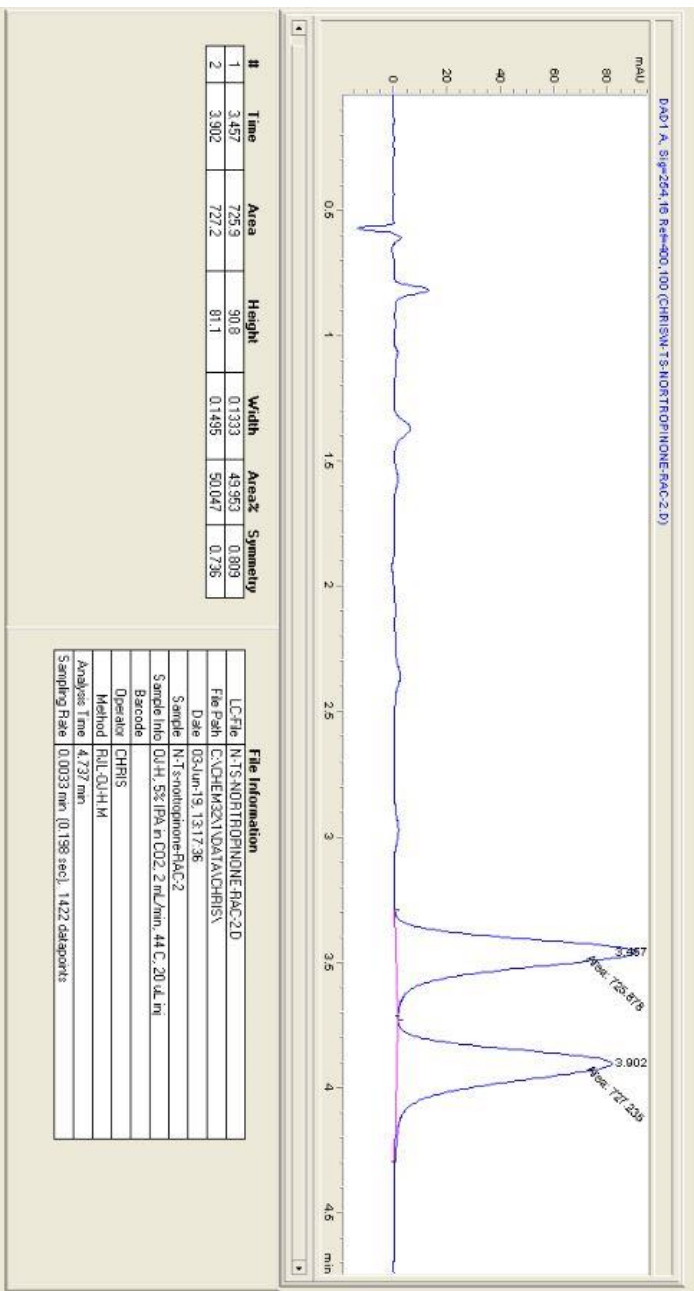

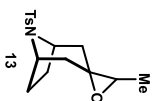

SFC, 0.1-H, 5% IPA:CO<sub>2</sub>  
 2 mL/min, 44°C, 15 uL  
 enantioenriched  
 80% ee

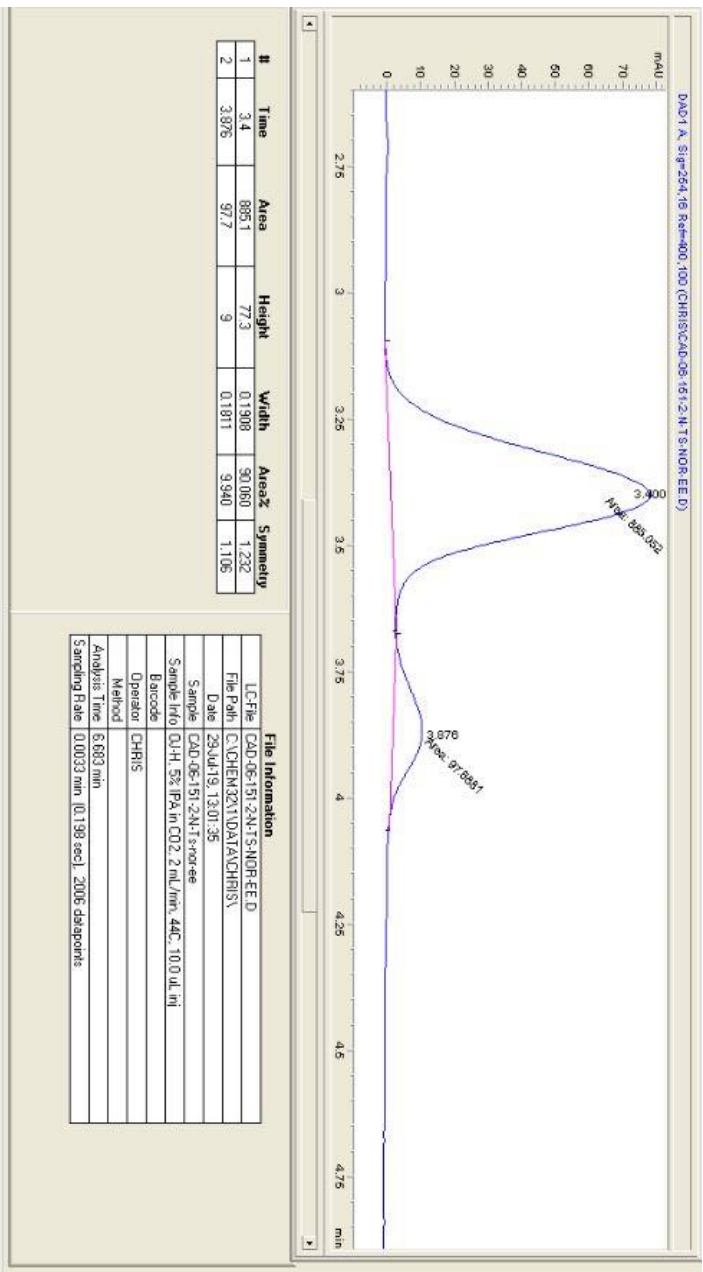

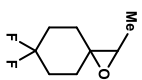

14

chiral GC/FID  
80 °C, 75 min  
racemic

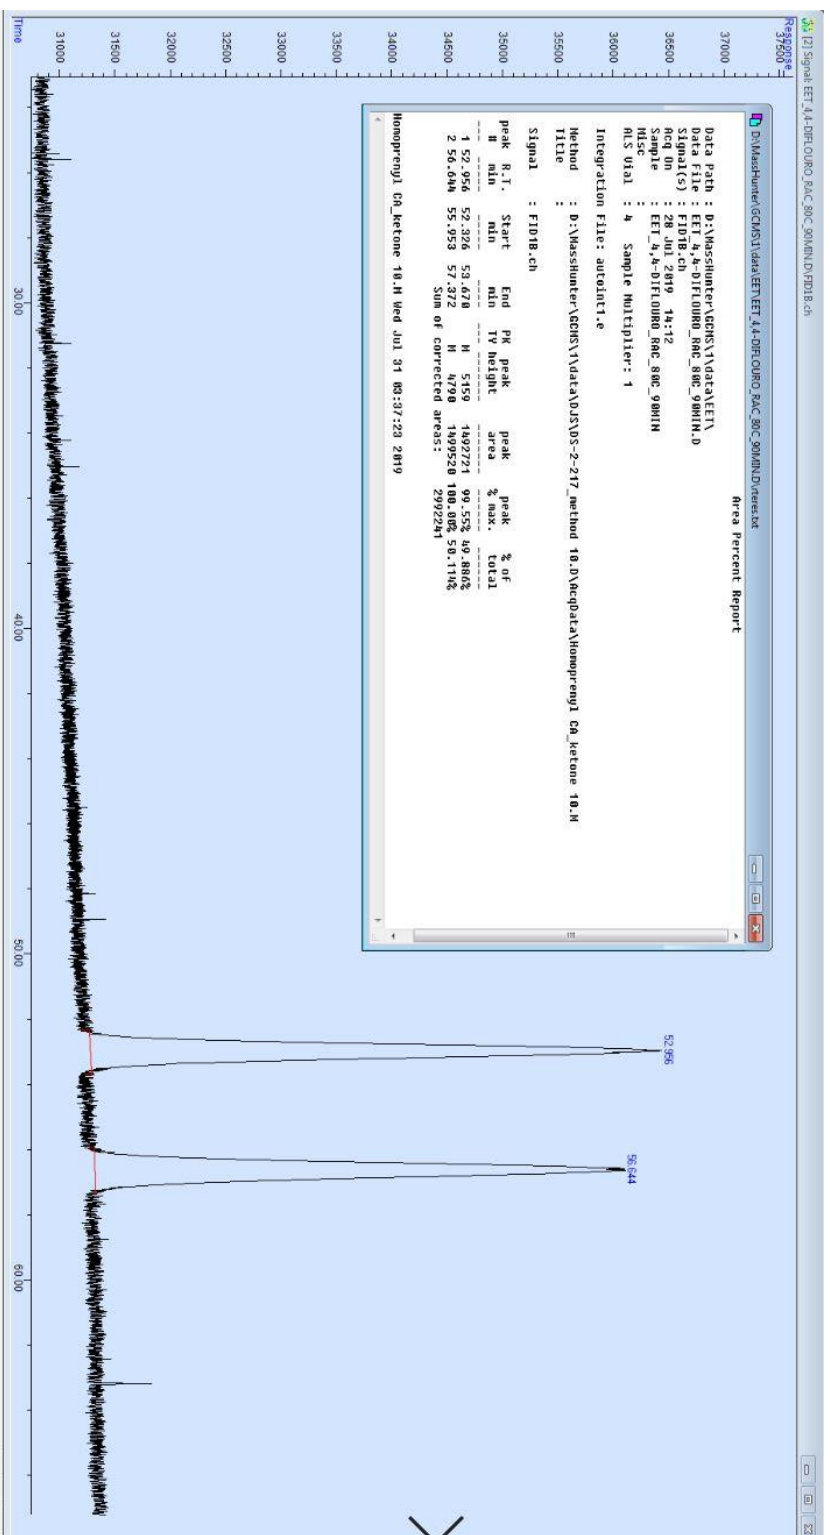

S144

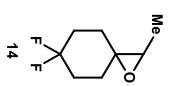

chiral GC/FID  
80 °C, 75 min  
enantiomerised  
89% ee

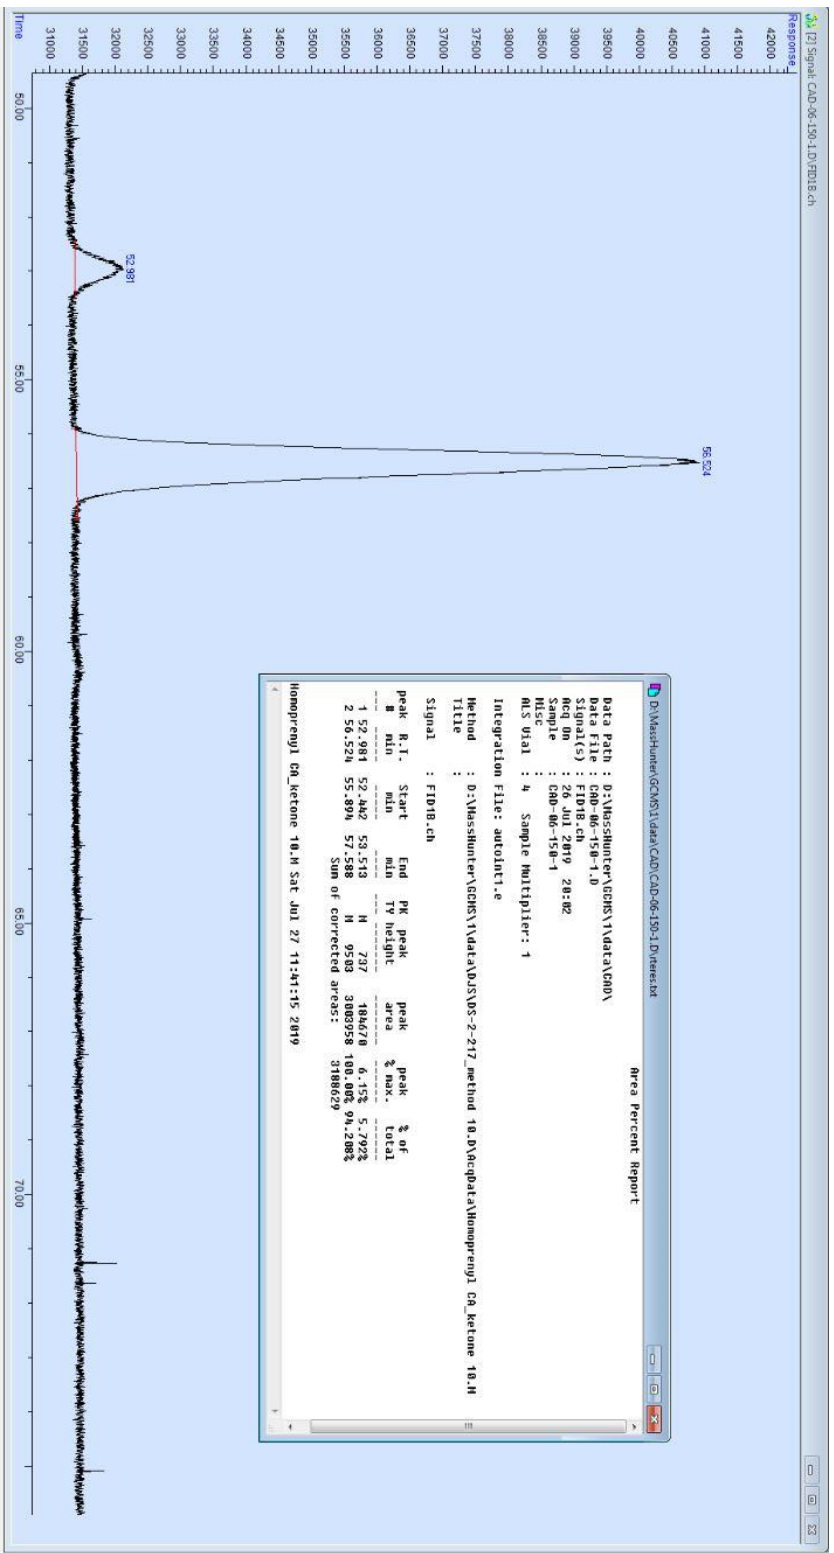

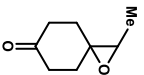

15

chiral GC/FID  
110 °C, 120 min  
racemic

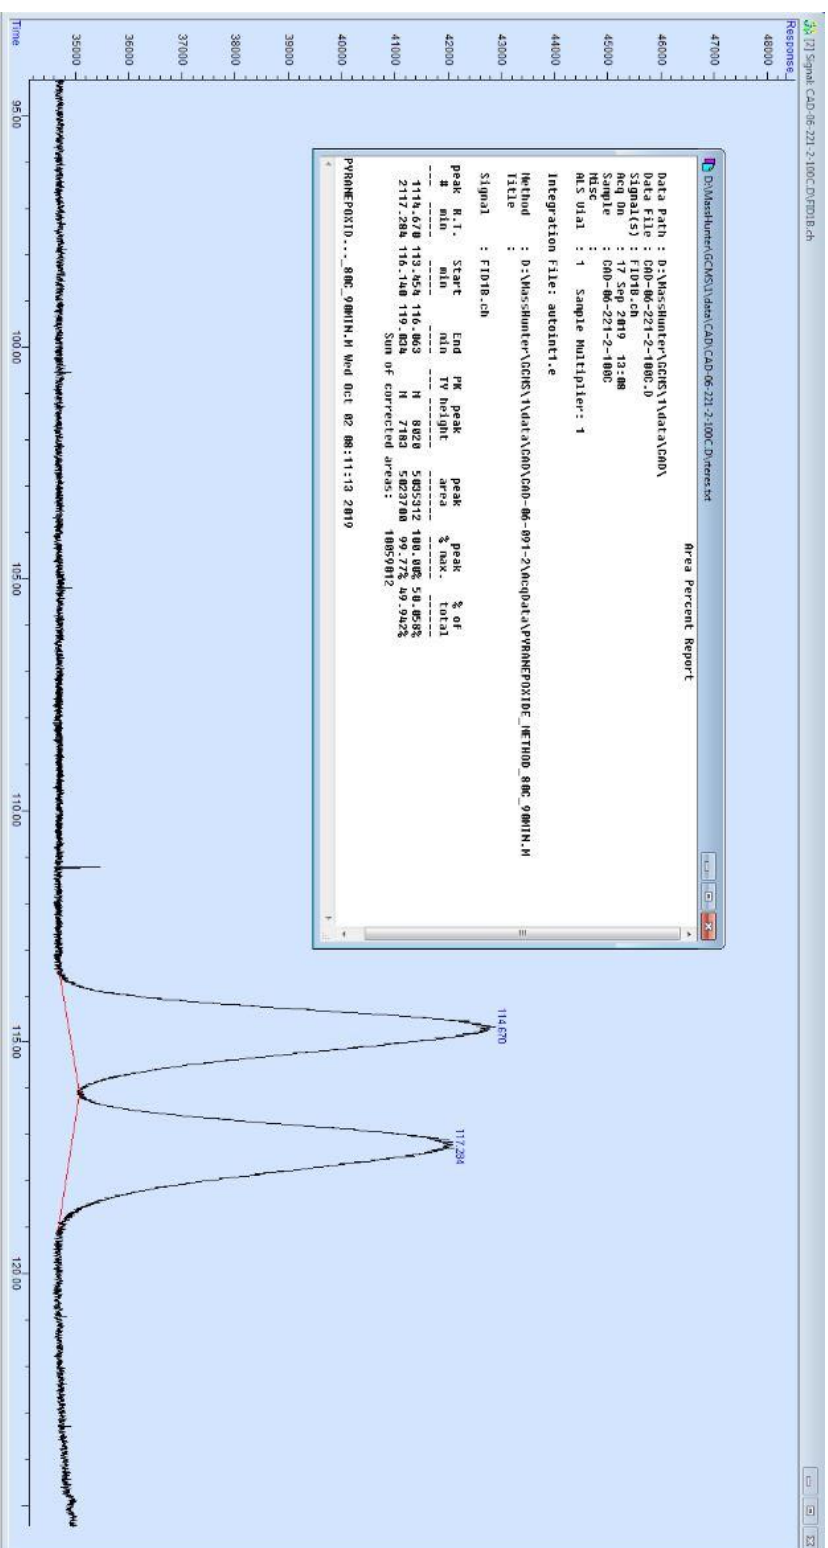

S146

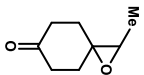

15

chiral GC/FID  
110 °C, 120 min  
enantiomeriched  
89% ee

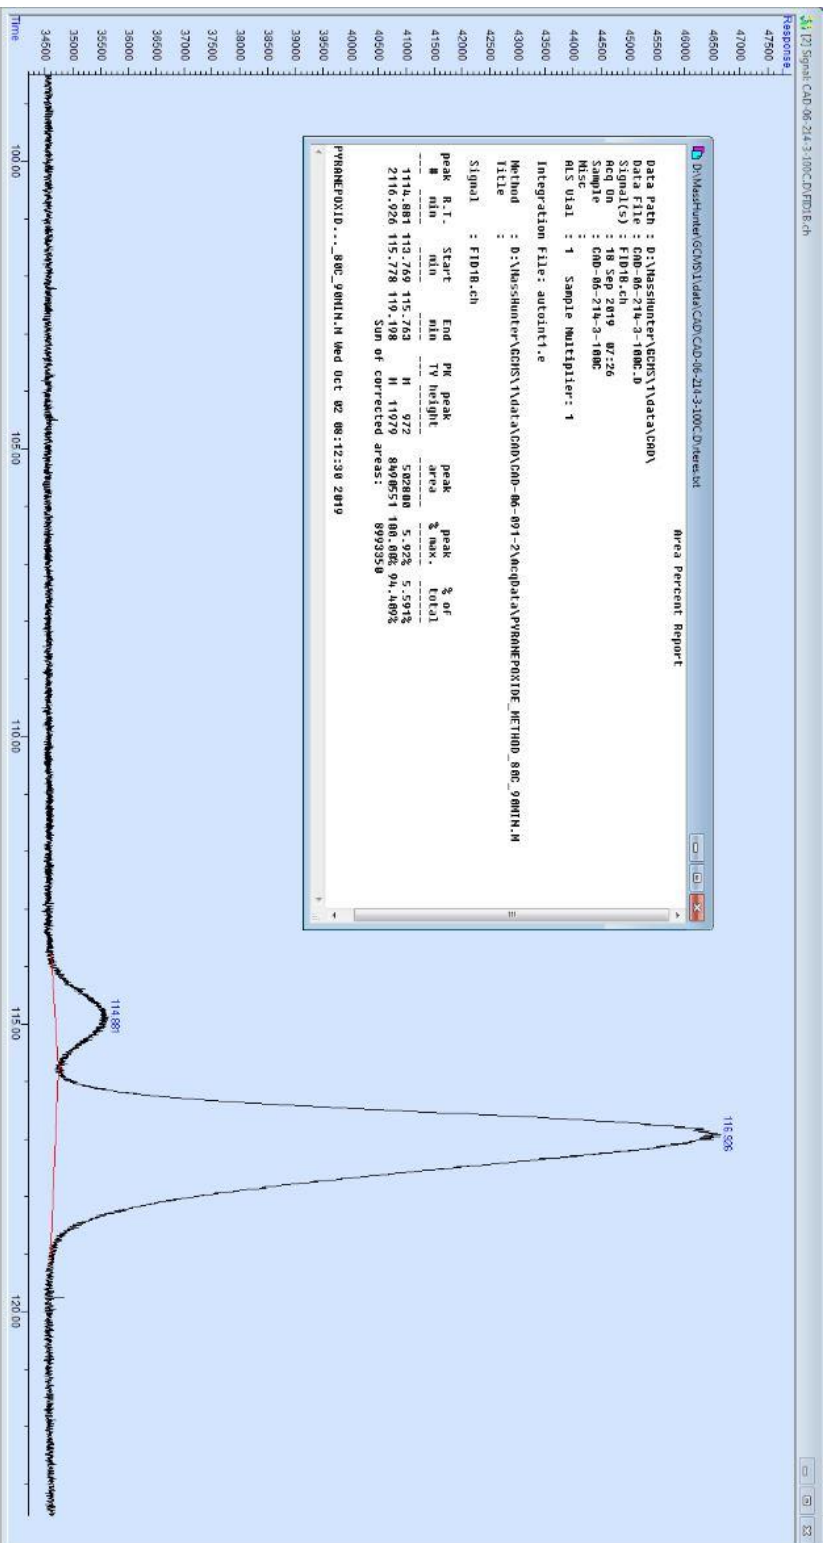

S147

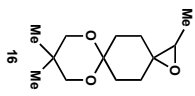

chiral GC/FID  
130 °C, 180 min  
racemic

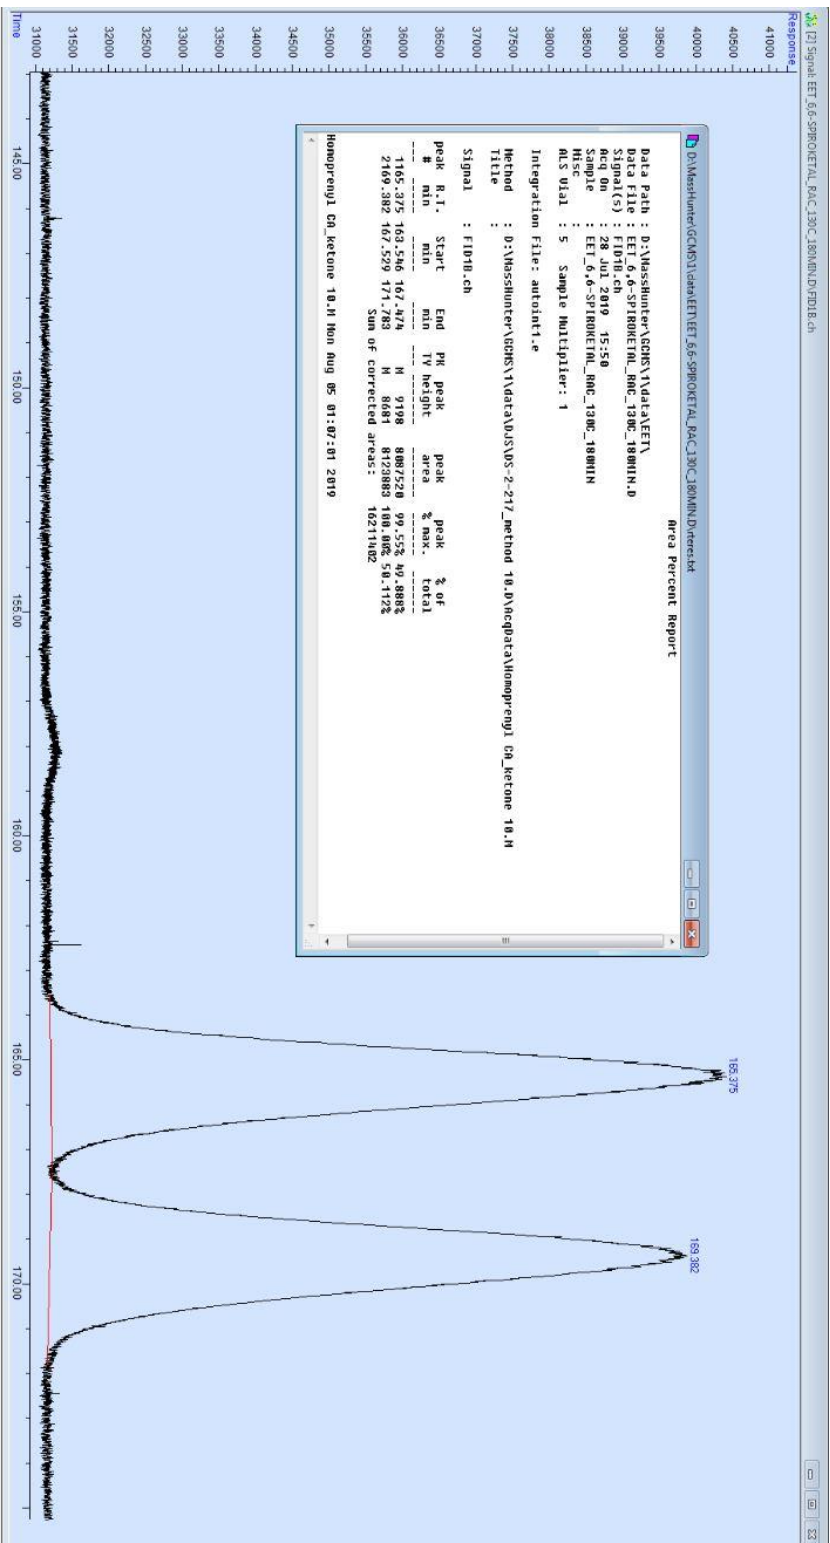



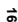

81% ee

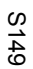

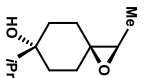

17

chiral GC/FID  
110 °C, 180 min  
then ramp to 200 °C  
at 10 °C per min  
racemic

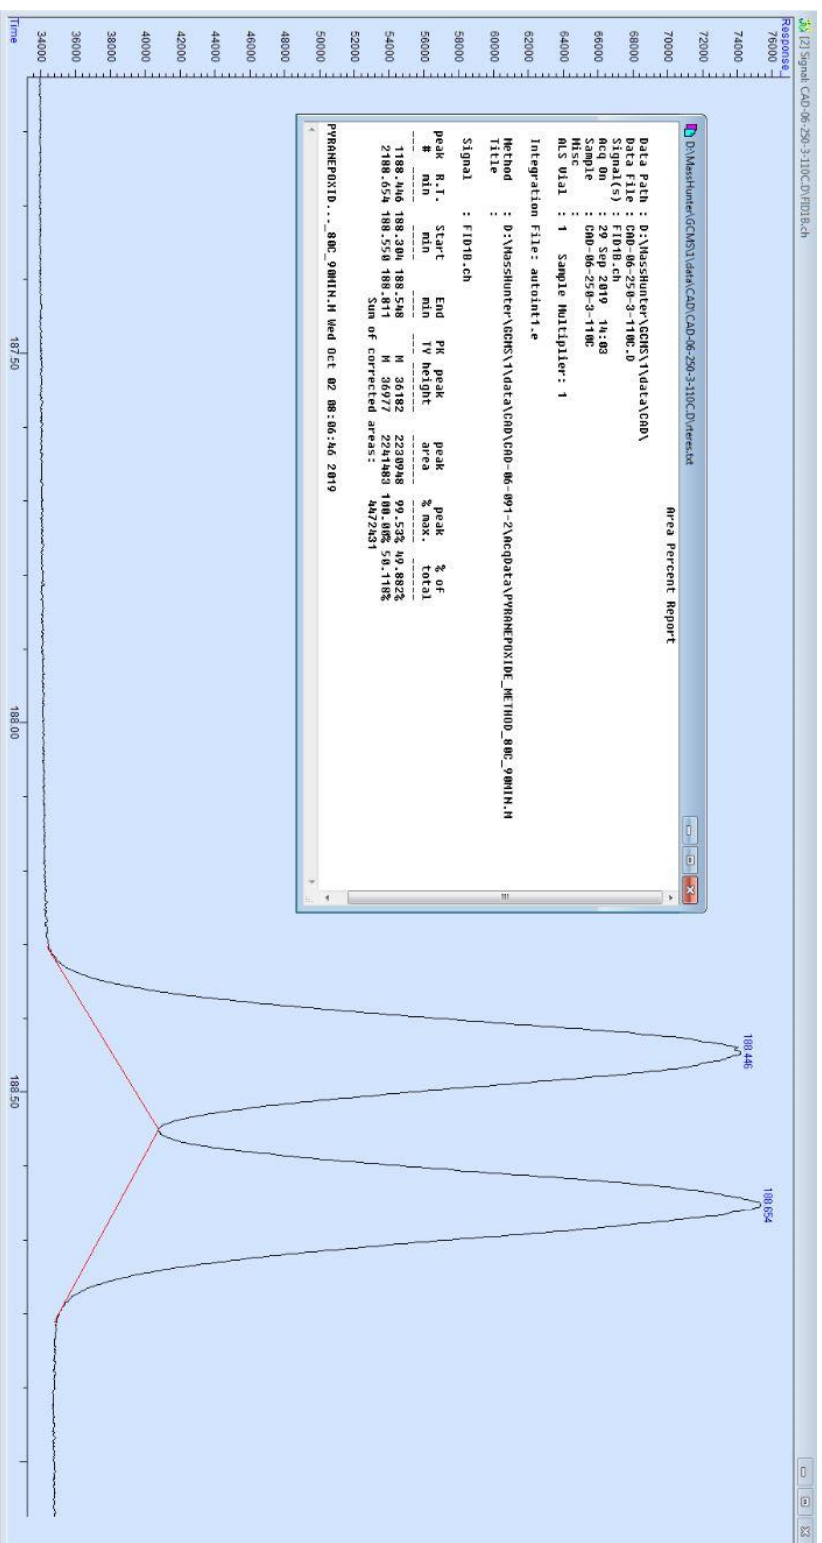

S150

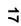

86% ee

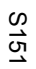

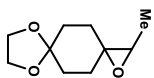

18

chiral GC/FID  
110 °C, 180 min  
ramp to 150 °C, 40 min  
racemic

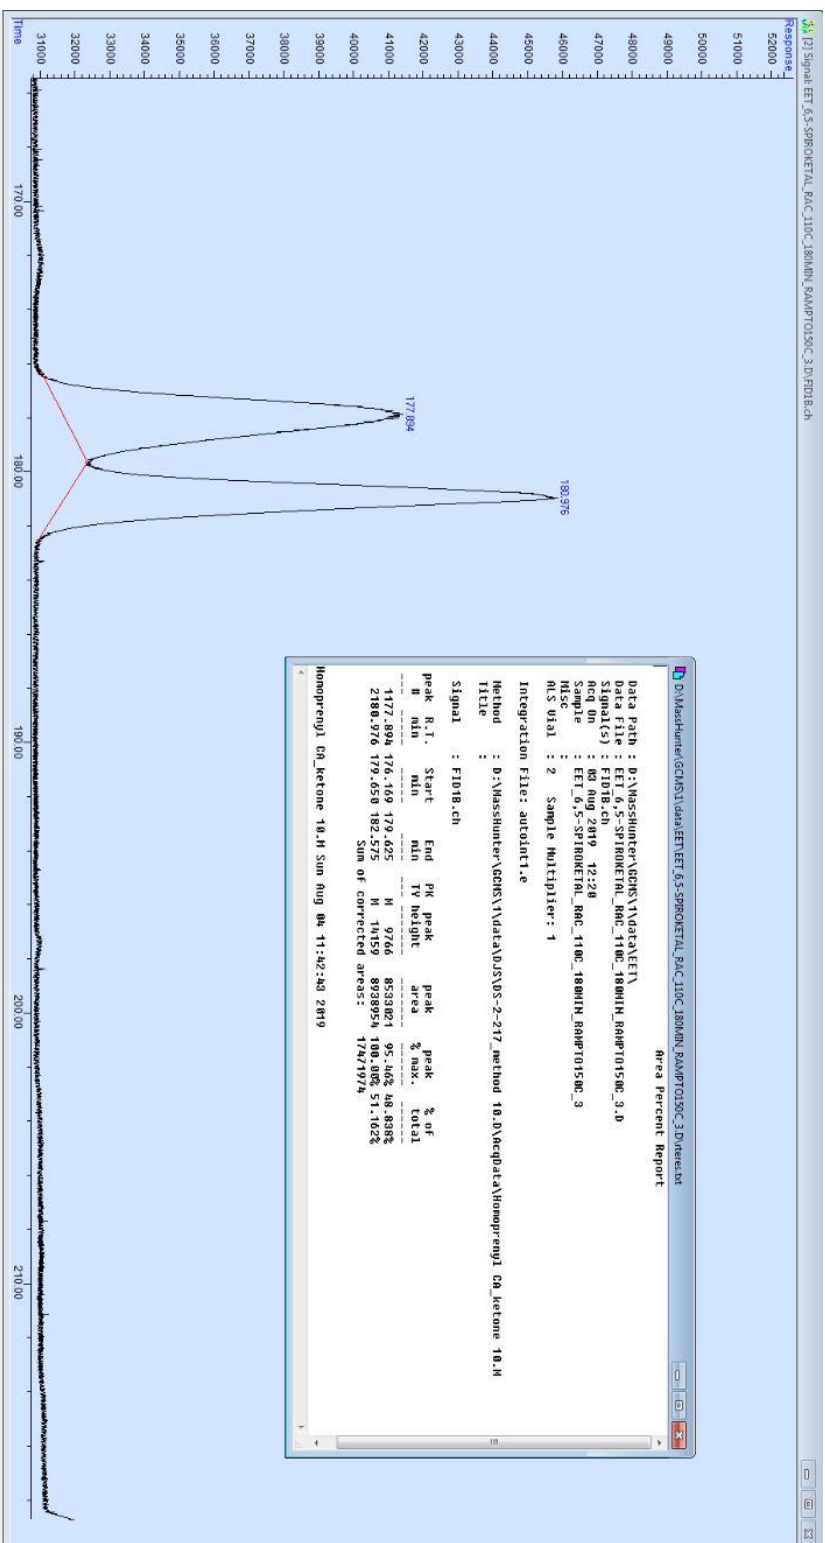

S152

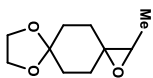

18

chiral GC/FID  
110 °C, 180 min  
ramp to 150 °C, 40 min  
enantiomerized  
92% ee

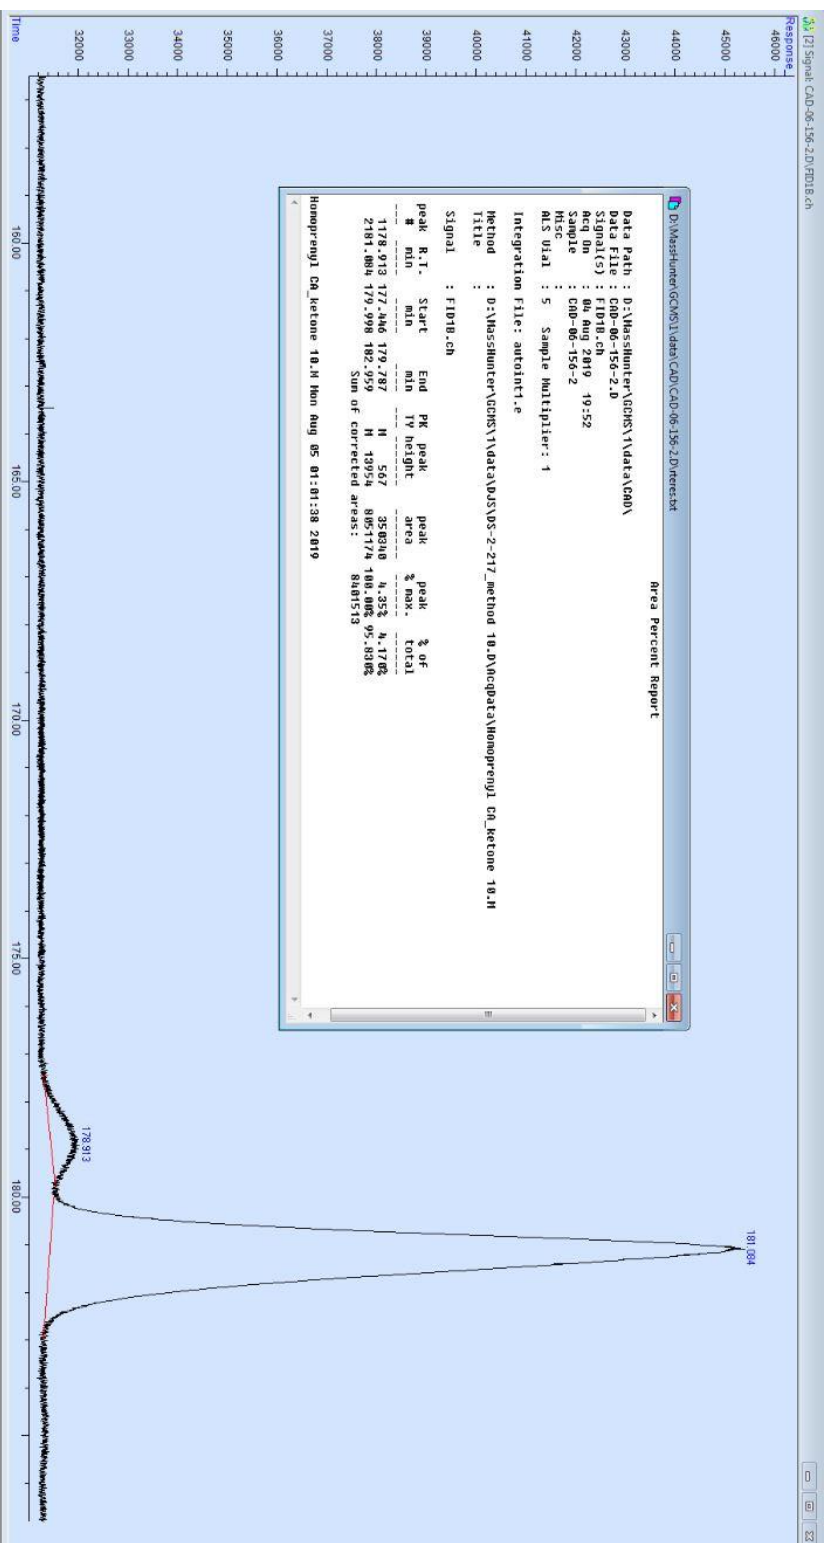

S153

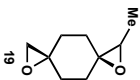

chiral GC/FID  
 110 °C, 90 min  
 racemic

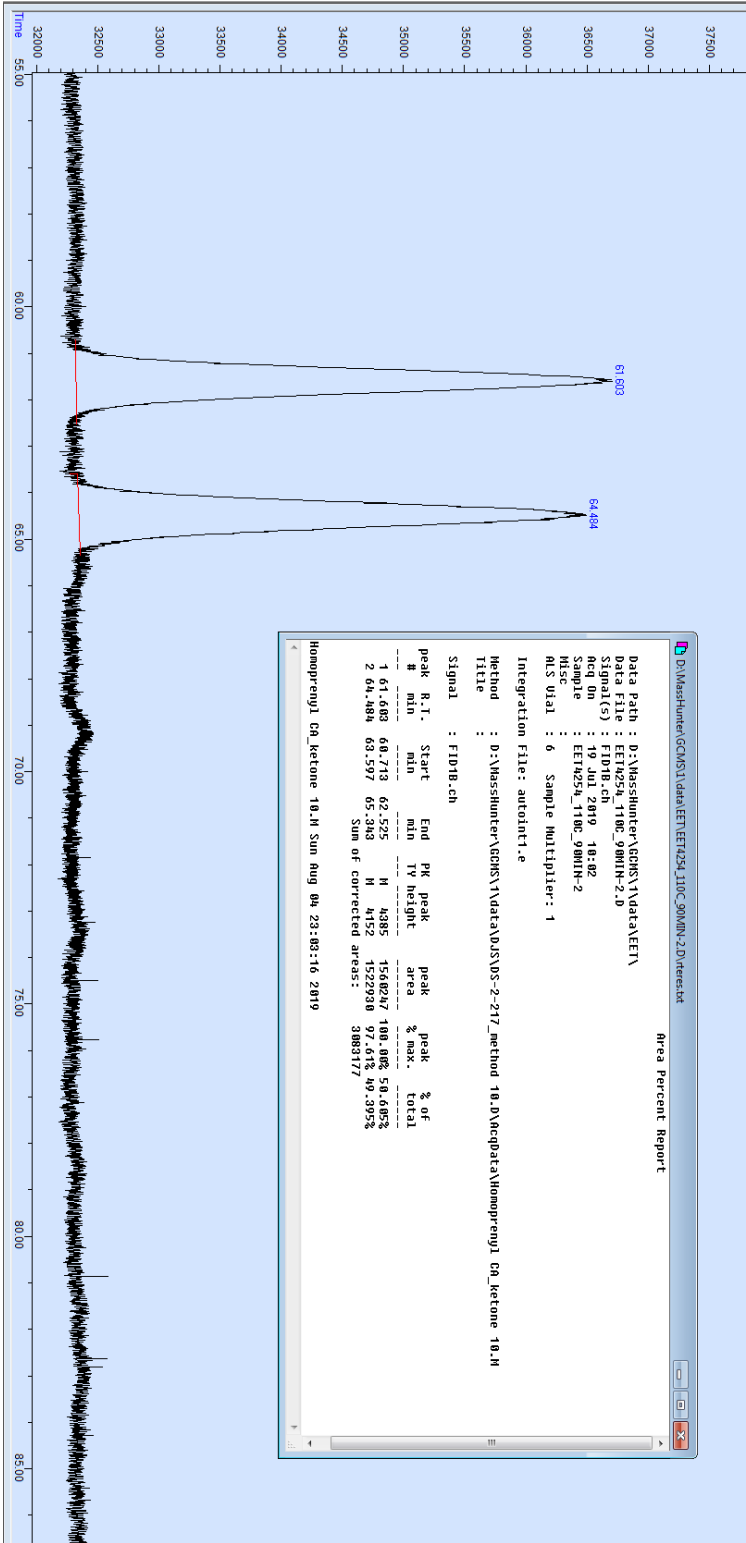

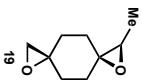

chiral GC/FID  
110 °C, 90 min  
enantiomerized  
91% ee

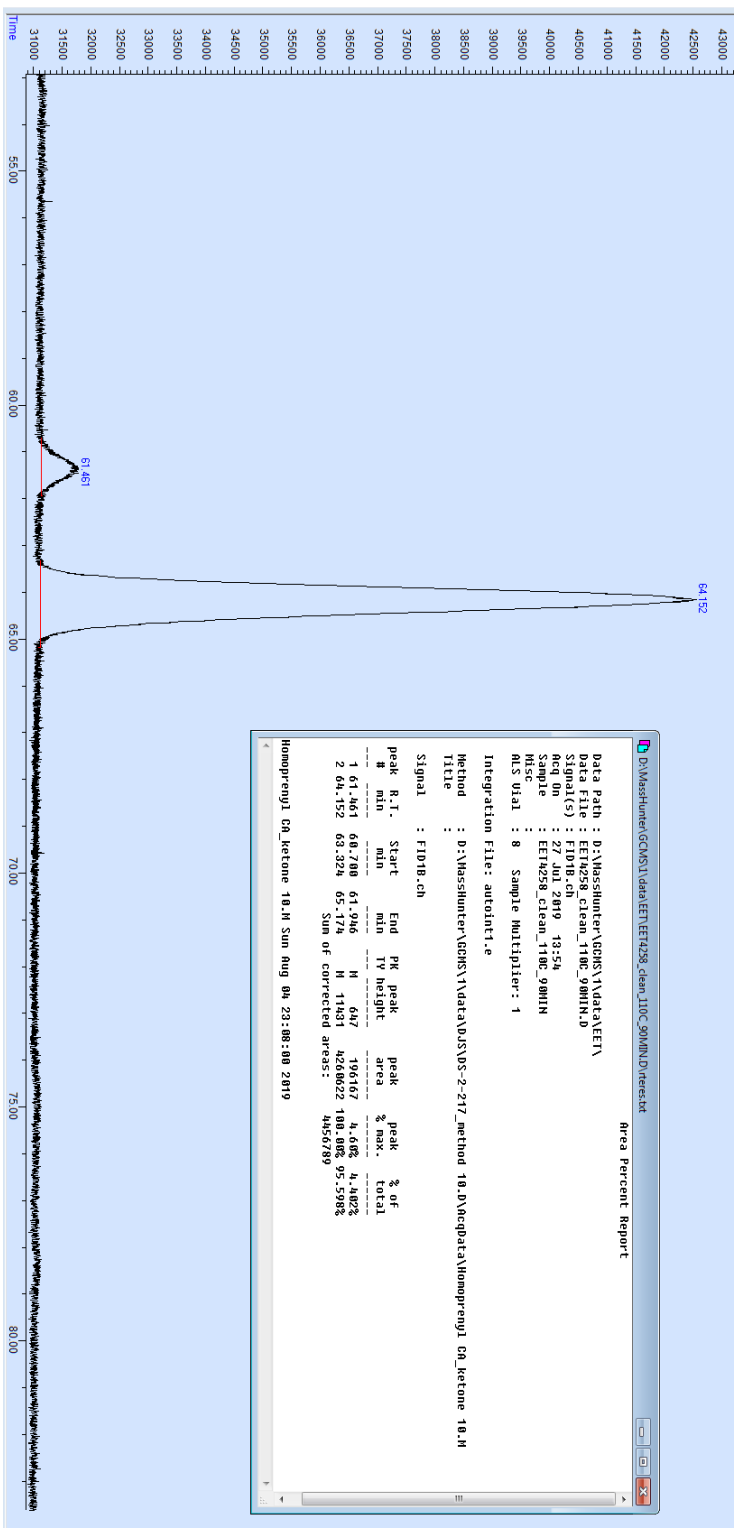

S155

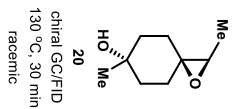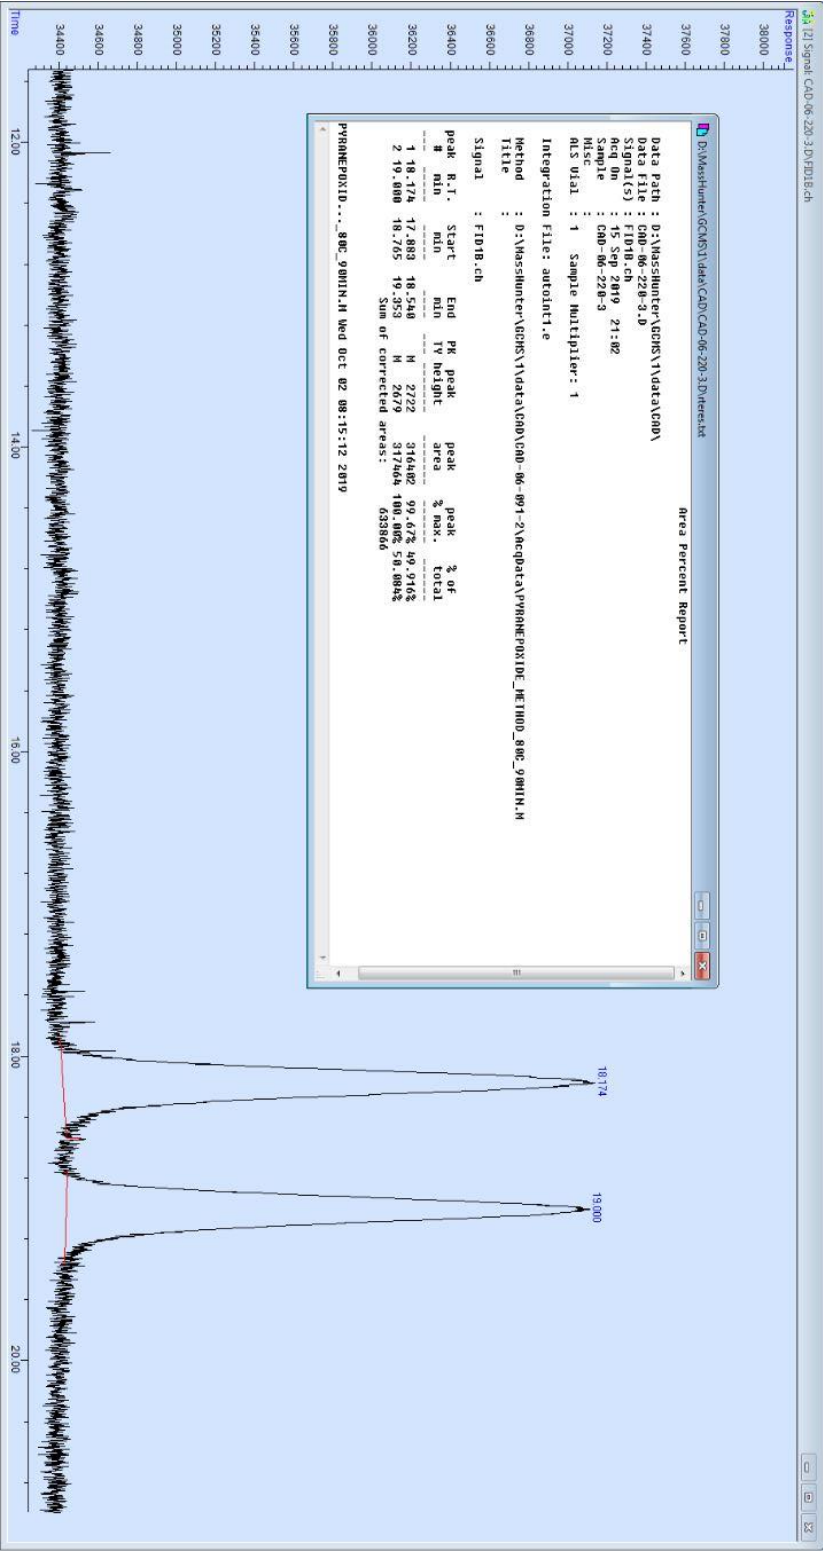



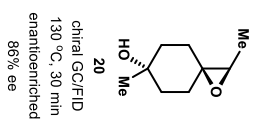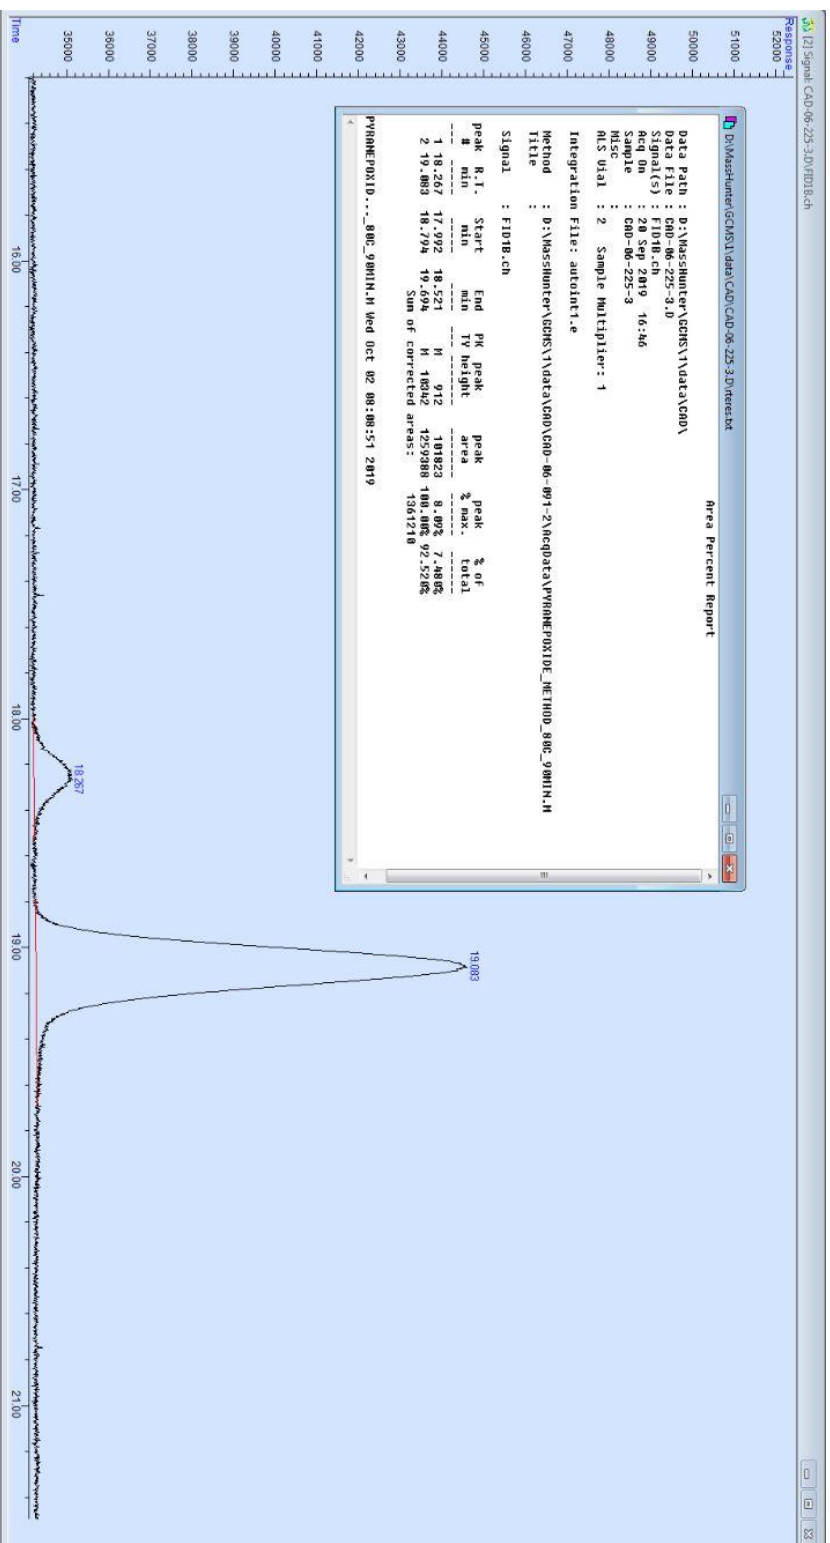

S157

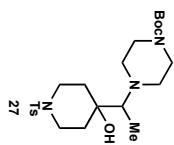

SFC OJ-H, 5% IPA/CO<sub>2</sub>  
2.0 mL/min  
racemic

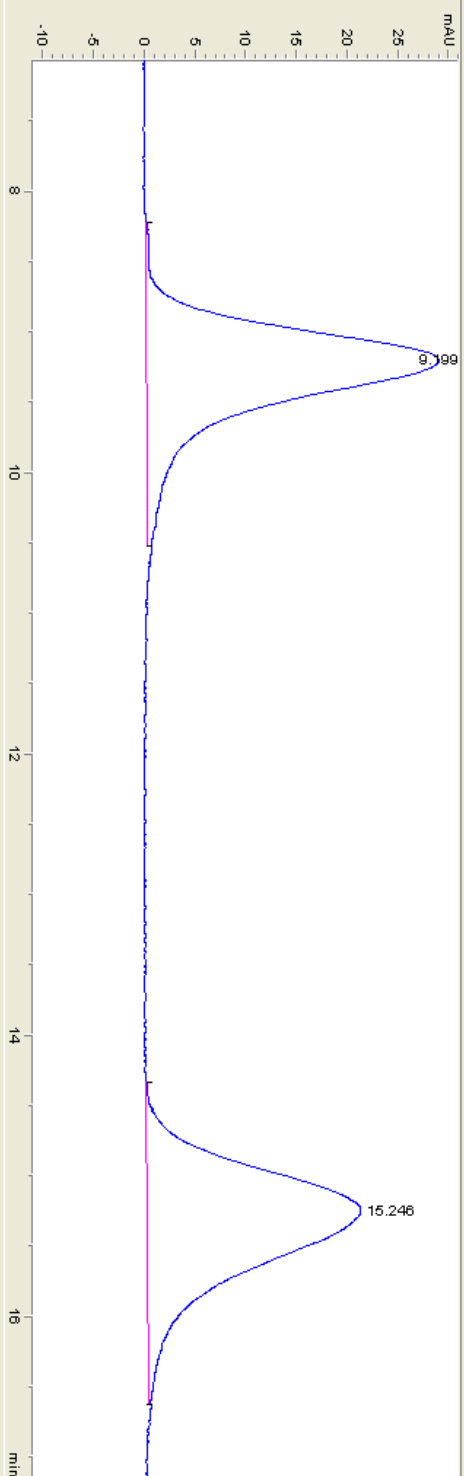

DAD1.D, Sig=240.16 Ref=400.100 (ERIC14201-1-OL5IPAD)

| # | Time   | Area  | Height | Width  | Area%  | Symmetry |
|---|--------|-------|--------|--------|--------|----------|
| 1 | 9.199  | 10436 | 28.9   | 0.5371 | 50.760 | 0.704    |
| 2 | 15.246 | 10123 | 21.1   | 0.6609 | 49.240 | 0.725    |

| File Information |                       |
|------------------|-----------------------|
| LC-File          | ET4201-1-OL5IPAD      |
| File Path        | C:\CHEM321\DATA\ERICY |
| Date             | 24-Jun-19, 18:59:57   |

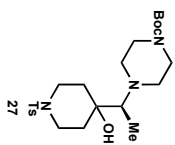

SFC O<sub>2</sub>/H<sub>2</sub>, 5% IPA/CO<sub>2</sub>  
 2.0 mL/min  
 enantioenriched  
 94% ee

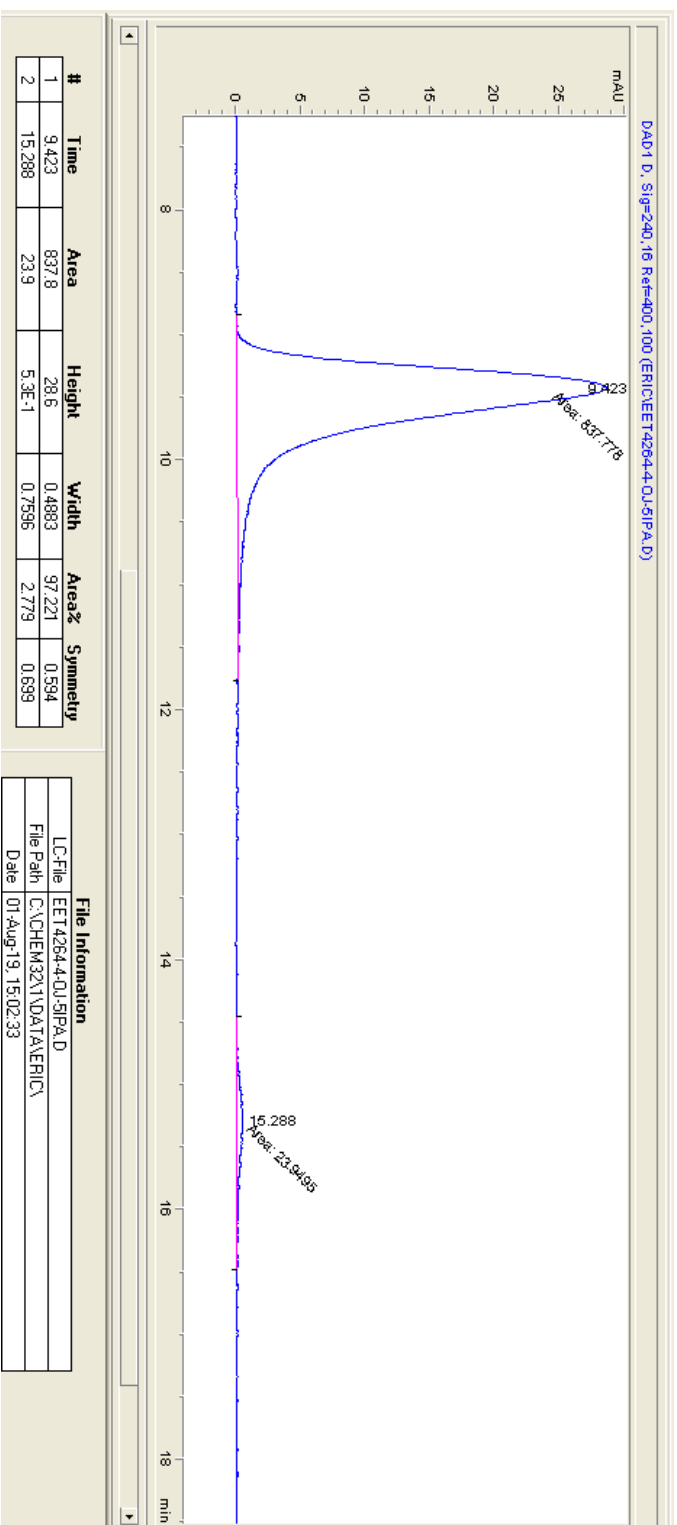

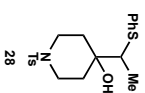

SFC, OD-H, 20% IPA, CO<sub>2</sub>  
2.0 mL/min  
racemic

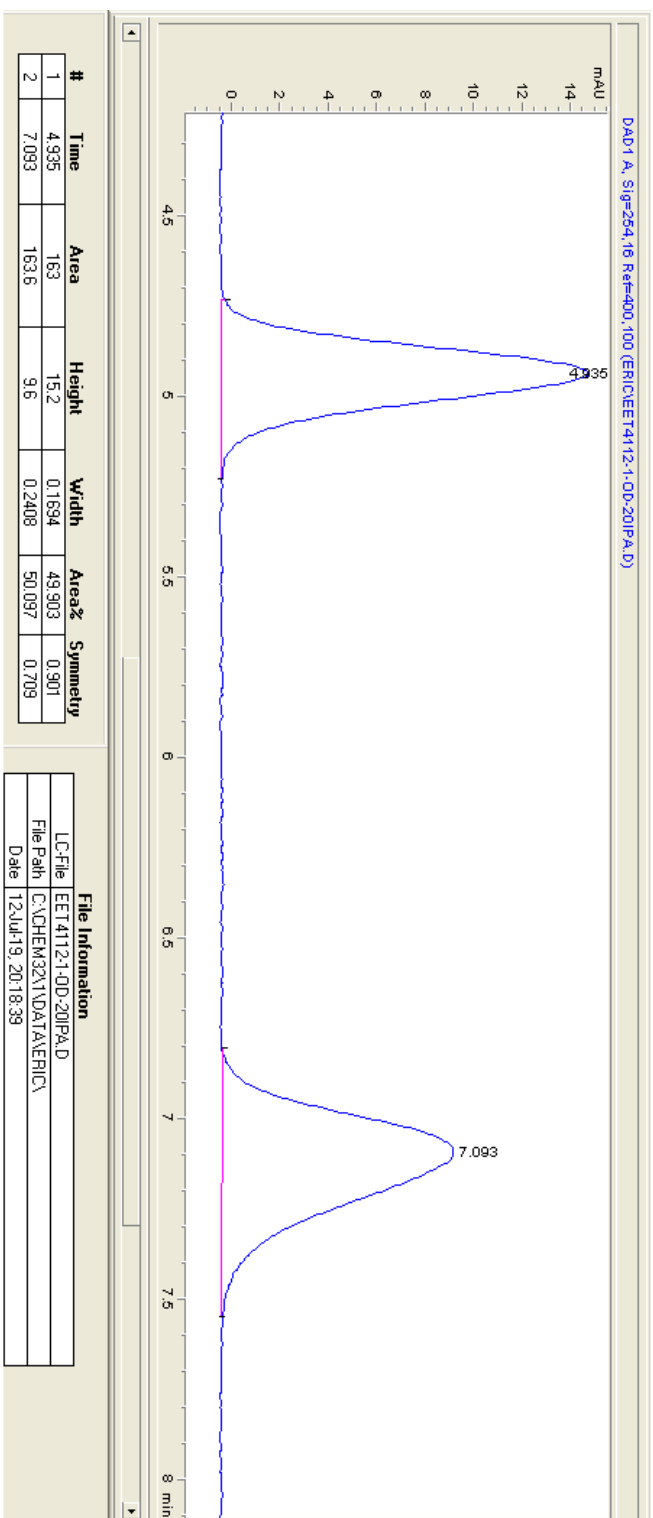

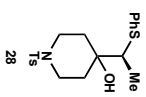

SFC, OD-H, 20% IPA/CO<sub>2</sub>  
2.0 mL/min  
enantioenriched  
94% ee

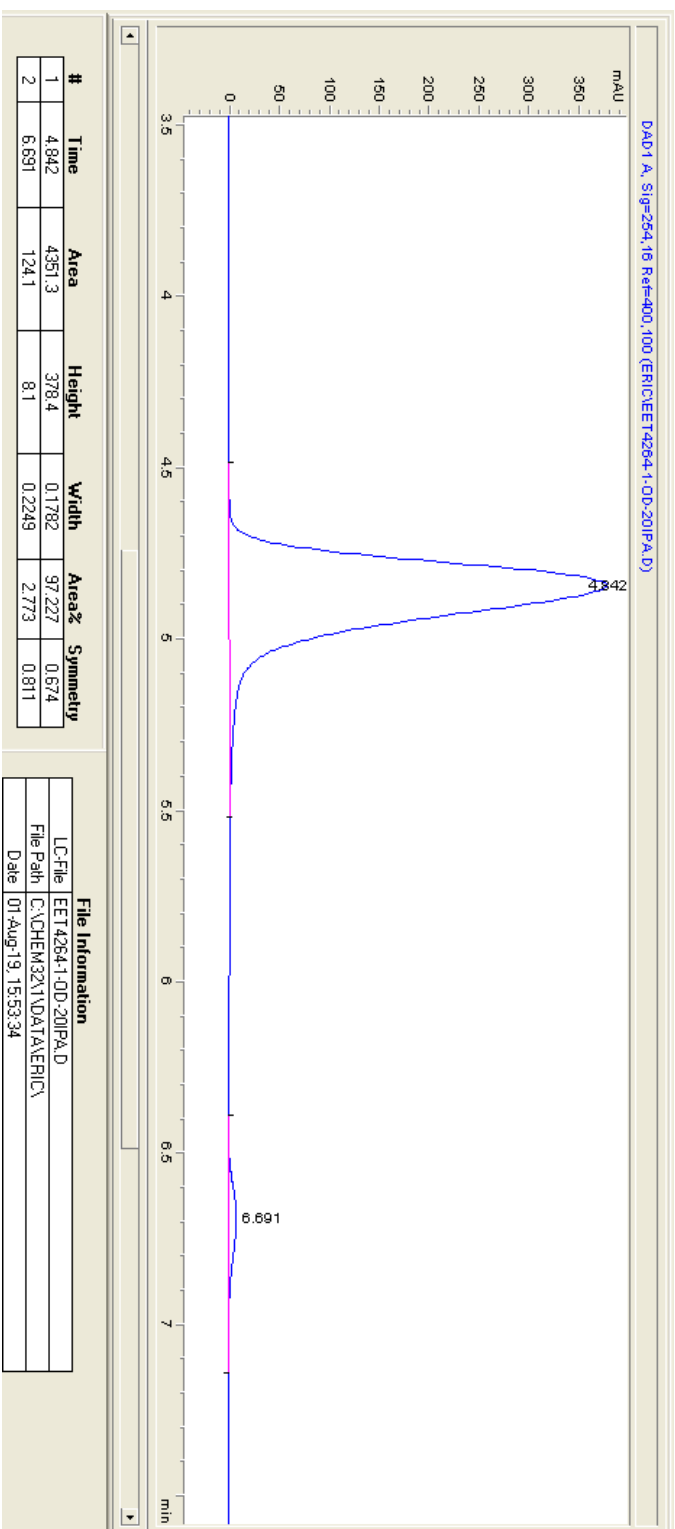

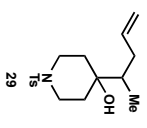

SFC, OD-H, 3% iPA/CO<sub>2</sub>  
2.0 mL/min  
racemic

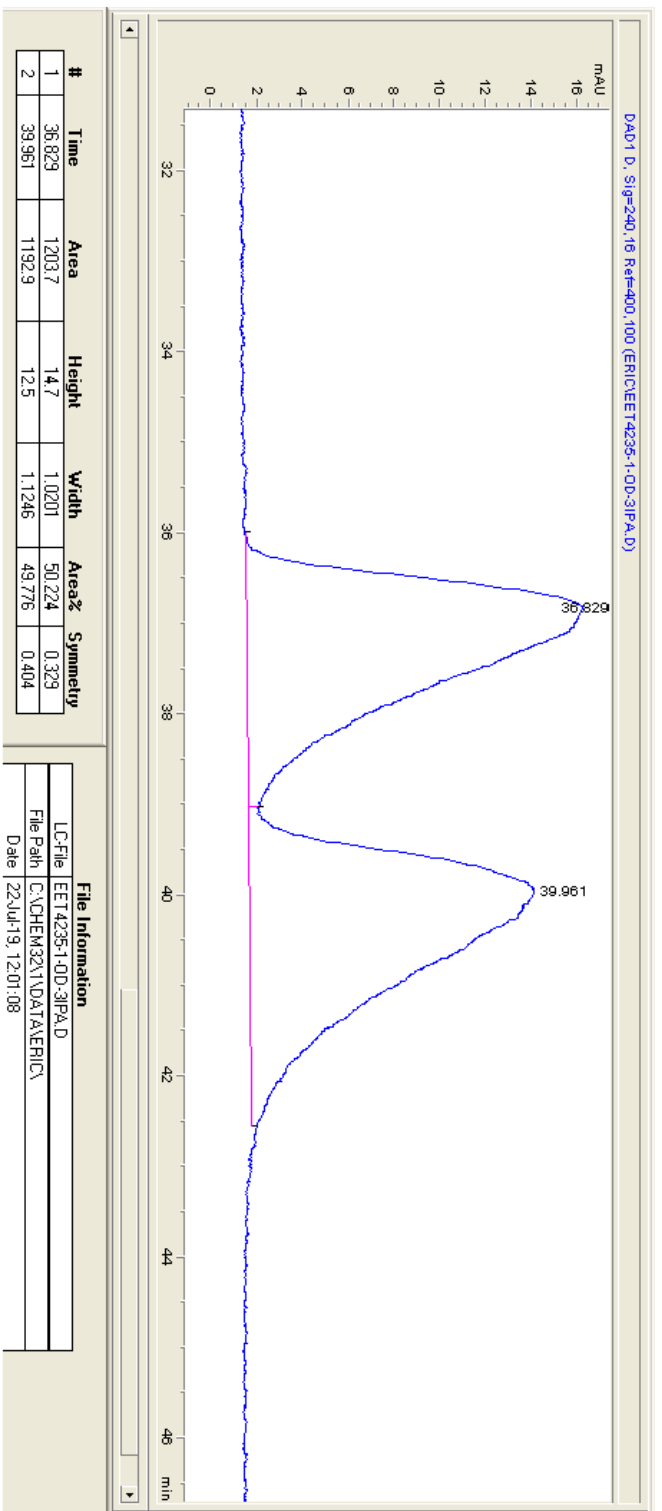

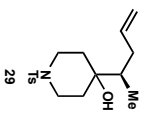

SFC, OD-H, 3% IPA/CO<sub>2</sub>  
2.0 mL/min  
enantiomerized  
95% ee

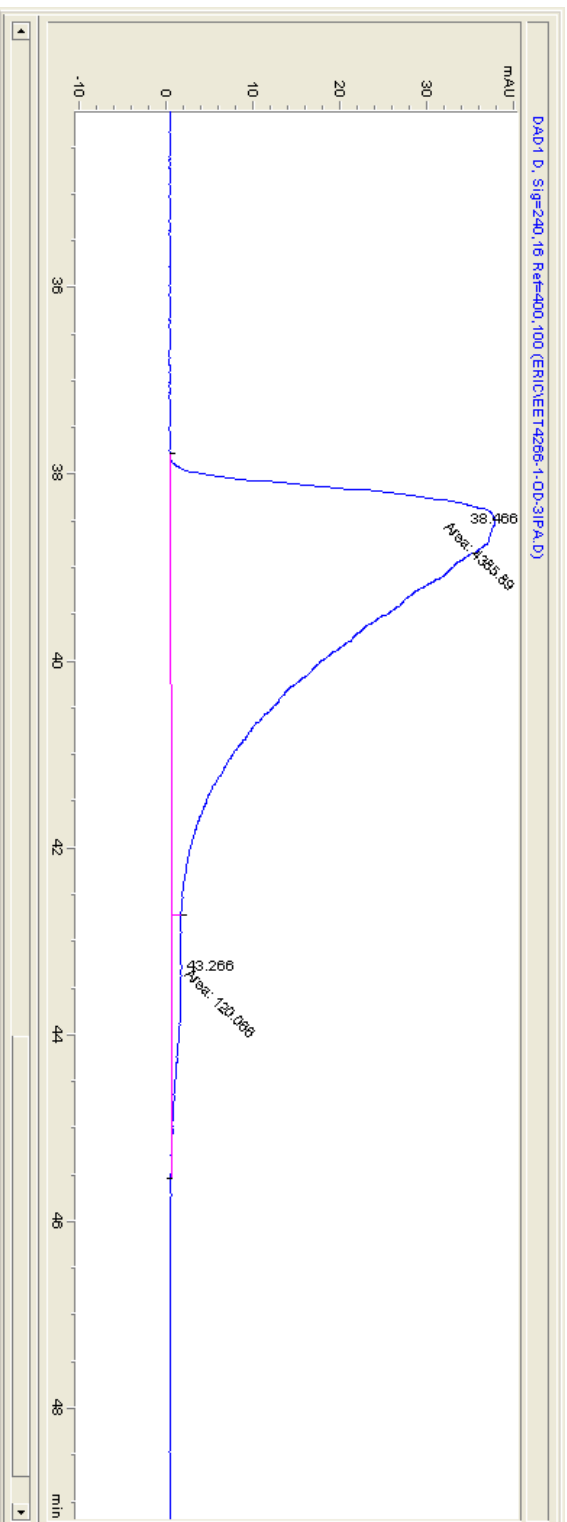

| # | Time   | Area   | Height | Width  | Area%  | Symmetry |
|---|--------|--------|--------|--------|--------|----------|
| 1 | 38.466 | 4385.9 | 37.4   | 1.9544 | 97.335 | 0.201    |
| 2 | 43.266 | 120.1  | 1.2    | 1.6246 | 2.665  | 0.495    |

| File Information |                         |
|------------------|-------------------------|
| LC-File          | EET4266-1-OD-3IPAD      |
| File Path        | C:\CHEM32\1\DATA\ERICA\ |
| Date             | 01-Aug-19, 16:11:34     |

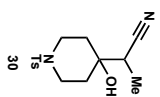

SFC, OJ-H, 20% IPAC:CO<sub>2</sub>  
2.0 mL/min  
racemic

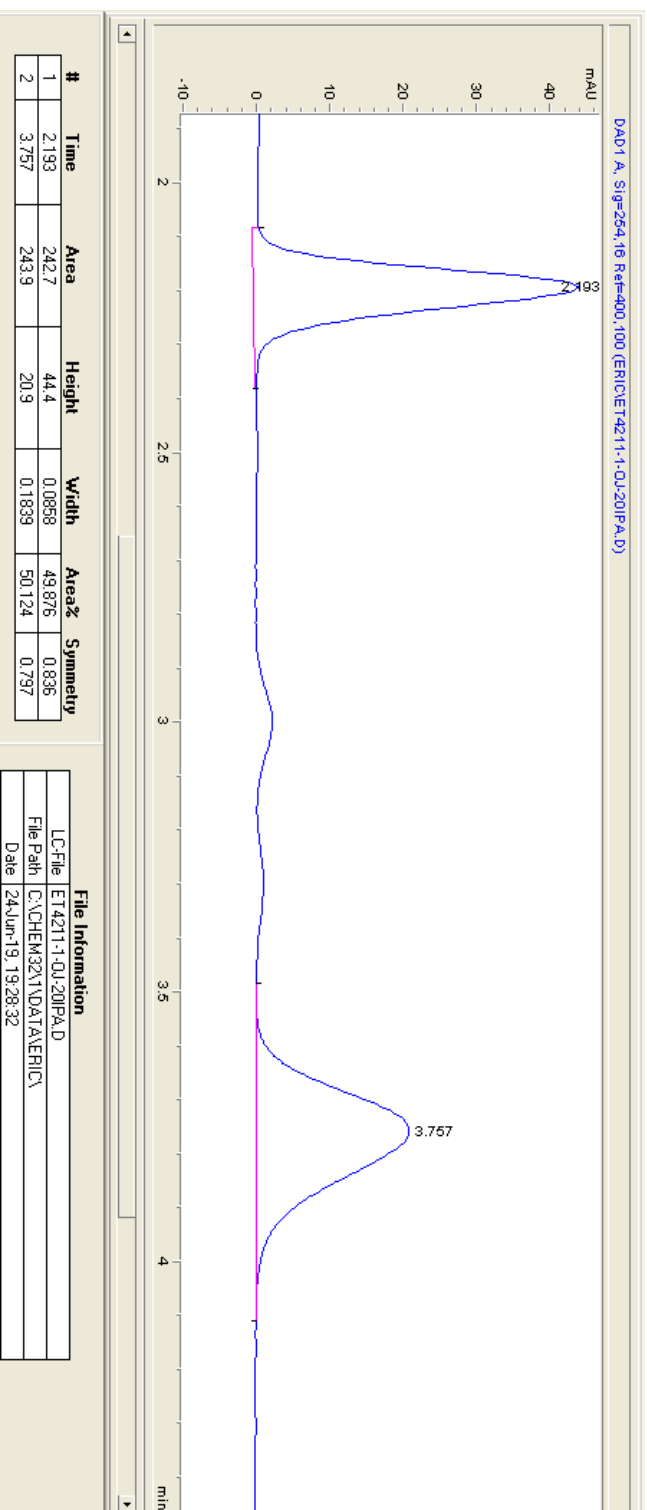



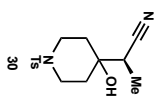

SFC, OJ-H, 20% IPA:CO<sub>2</sub>  
2.0 mL/min  
enantiomerized  
95% ee

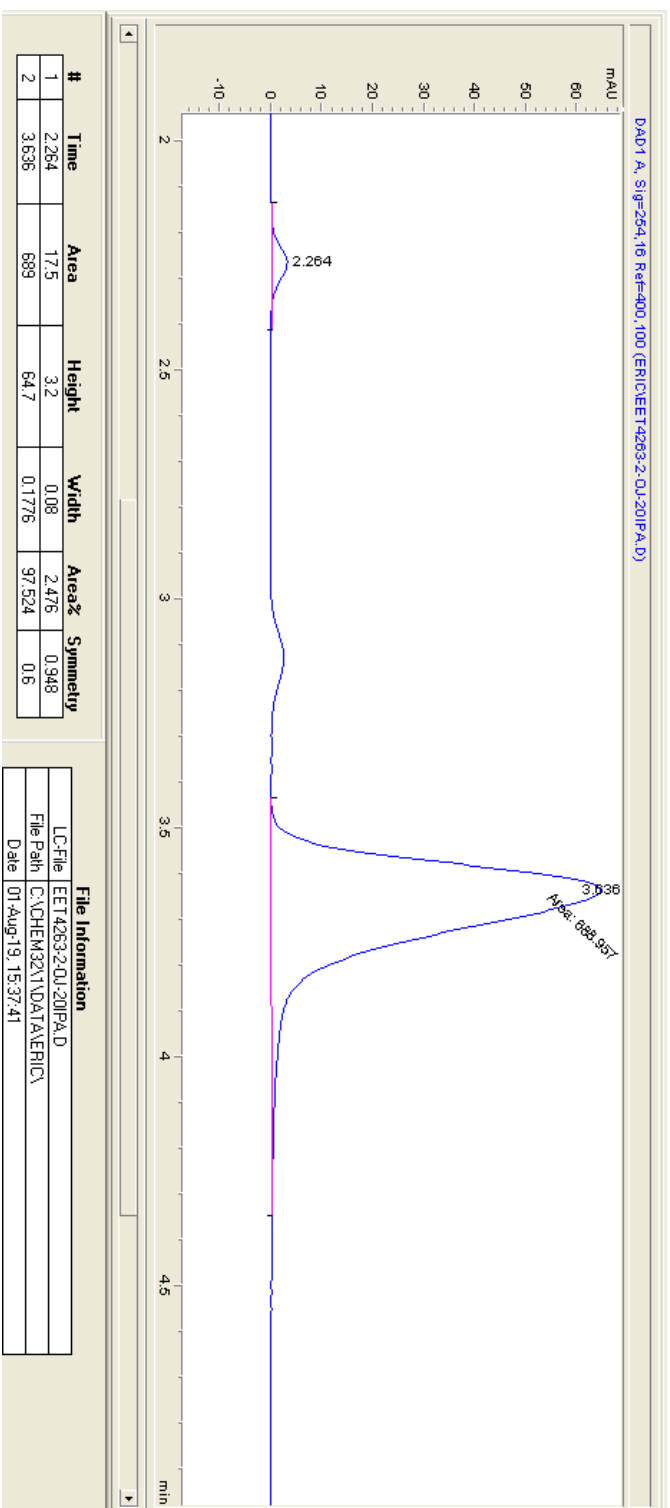

Supplement: Supplementary file 1 [file 18112817]
